# Supplementary material for: Local dynamics of a white syndrome outbreak and changes in the microbial community associated with colonies of the scleractinian brain coral Pseudodiploria strigosa
Source: PeerJ. 2021 Feb 2;9:e10695. doi: 10.7717/peerj.10695 (PMC7863780; doi:10.7717/peerj.10695)
Supplement: Table S2 [file peerj-09-10695-s003.xlsx]

## Sheet: Sheet1
ASV_ID	UCL1	UCL2	UCL3	UAL1	UAL2	SWD	H1	H2	H3	SWH	Domain	Phylum	Class	Order	Family	Genus	Species
0048c3c9a664690bd20c1ed31e5cbeea	0	0	0	0.0421687	0	0	0	0	0	0	Bacteria	Proteobacteria	Gammaproteobacteria	Betaproteobacteriales	Burkholderiaceae	Achromobacter	Unassigned
004ed405f907328095b100d57d9cc5d2	0	0	0	0	0	0	0.0361446	0	0	0	Bacteria	Proteobacteria	Gammaproteobacteria	Enterobacteriales	Enterobacteriaceae	Enterobacter	Unassigned
0060f396505ea59c94be0296a9b93699	0	0	0	0	0	0.0120482	0	0	0	0	Bacteria	Fusobacteria	Fusobacteriia	Fusobacteriales	Fusobacteriaceae	Propionigenium	Unassigned
0074c6db4adf7be80356cac9f397a87c	0	0	0.0120482	0	0	0	0	0	0	0	Bacteria	Spirochaetes	Leptospirae	Leptospirales	Leptospiraceae	Leptospira	Unassigned
0132d902ed0dd6a87ba5d2dab00df285	0	0	0.108434	0	0	0	0	0	0	0	Bacteria	Bacteroidetes	Bacteroidia	Bacteroidales	Prolixibacteraceae	Roseimarinus	uncultured Bacteroidetes bacterium
01af52aba4bbe4ad3baf338d1a03182e	0	0	0	0	0	0.0120482	0	0	0	0	Bacteria	Bacteroidetes	Bacteroidia	Flavobacteriales	Flavobacteriaceae	uncultured	Unassigned
02585f8f905460b70c1031db166810cb	0	0	0	0	0	0.0180723	0	0	0	0	Bacteria	Proteobacteria	Alphaproteobacteria	Puniceispirillales	SAR116 clade	uncultured bacterium	uncultured bacterium
0272bda16e9c91e2303acc0525dac77b	0	0	0	0	0	0.0180723	0	0	0	0	Bacteria	Proteobacteria	Gammaproteobacteria	Cellvibrionales	Spongiibacteraceae	Spongiibacter	Unassigned
02ad6d545f3f5cc5fffa5dd24876a61b	0	0	0	0	0.138554	0	0	0	0	0	Bacteria	Actinobacteria	Actinobacteria	Micrococcales	Dermabacteraceae	Brachybacterium	Unassigned
02cb35945e1e2a75130bc7127c6769c8	0.349398	0	0	0	0	0	0	0	0	0	Bacteria	Bacteroidetes	Bacteroidia	Sphingobacteriales	Sphingobacteriaceae	Sphingobacterium	Unassigned
02e905e7fa40afacc7dc6a51c286a207	0	0	0	0	0	0	0	0	0.0421687	0	Bacteria	Proteobacteria	Alphaproteobacteria	Rhodobacterales	Rhodobacteraceae	Unassigned	Unassigned
02f6d27bedd687c50bc36f27171f6dbd	0	0	0	0	0	0	0	0.0481928	0	0	Bacteria	Proteobacteria	Gammaproteobacteria	Betaproteobacteriales	Burkholderiaceae	Aquabacterium	Unassigned
034dd759b2060570cee6d5e96dc3aa88	0	0	0	0	0	0	0	0.126506	0	0	Bacteria	Proteobacteria	Alphaproteobacteria	Puniceispirillales	SAR116 clade	uncultured bacterium	uncultured bacterium
035917e577badc1662a09d9b09428f4f	0	0	0	0.0783133	0	0	0	0	0	0	Bacteria	Bacteroidetes	Bacteroidia	Flavobacteriales	Flavobacteriaceae	Winogradskyella	Unassigned
036e6b0383d0a3c354d61058600bd384	0	0	0	0	0	0.168675	0	0	0	0	Bacteria	Proteobacteria	Alphaproteobacteria	Puniceispirillales	SAR116 clade	uncultured bacterium	uncultured bacterium
039db4403e6c58d315aa40f78fd53413	0.512048	0.493976	0	2.44578	4.06024	0	2.4759	2.94578	1.98193	0	Bacteria	Proteobacteria	Gammaproteobacteria	Pseudomonadales	Pseudomonadaceae	Pseudomonas	Unassigned
03af1410868bf76ace5a72824ae0fcbe	0	0	0	0	0	0.0180723	0	0	0	0	Bacteria	Proteobacteria	Gammaproteobacteria	Betaproteobacteriales	Methylophilaceae	OM43 clade	uncultured bacterium
040f48f91b5245e4e5f5de996f3e3a73	0	0	0	0	0	0	0.0481928	0	0	0	Bacteria	Proteobacteria	Gammaproteobacteria	Cellvibrionales	Cellvibrionaceae	uncultured	Unassigned
04fc29ebed356f85dc628725a10f4c27	0.156627	0	0	0	0	0	0	0	0	0	Bacteria	Proteobacteria	Gammaproteobacteria	Vibrionales	Vibrionaceae	Vibrio	uncultured bacterium
04fd6037cba09acc161678ae0750429c	0	0	0	0	0	0	0.89759	0	0	0	Bacteria	Proteobacteria	Gammaproteobacteria	Vibrionales	Vibrionaceae	Vibrio	Unassigned
05099bccab537cd5dfb00801ae804197	0	0	0	0	0	0	0.475904	0	0	0	Bacteria	Bacteroidetes	Bacteroidia	Bacteroidales	Marinifilaceae	Marinifilum	uncultured bacterium
053b3863d12e13a755b65c57c1b53b5a	0	0	0	0	0	0	0	0	0	0.0180723	Bacteria	Spirochaetes	Spirochaetia	Spirochaetales	Spirochaetaceae	Spirochaeta 2	uncultured bacterium
05a0be5612f86a862f4a9b3225f4a970	0	0	0.0060241	0	0	0	0	0	0	0	Bacteria	Firmicutes	Bacilli	Lactobacillales	Leuconostocaceae	Leuconostoc	uncultured bacterium
05b6770ab0915868c4ba68cec8075b7c	0	0	0	0	0	0	0.0060241	0	0	0	Bacteria	Bacteroidetes	Chlorobia	Chlorobiales	Chlorobiaceae	Unassigned	Unassigned
05f977f1f8572fe7efcec1cd5692212a	0	0	0	0	0	0.0240964	0	0	0	0	Bacteria	Proteobacteria	Alphaproteobacteria	SAR11 clade	Clade III	Unassigned	Unassigned
0605ae5ef26130534e80d8450f86bd17	0	0	0	0	0	0	0	0.126506	0	0	Bacteria	Proteobacteria	Alphaproteobacteria	SAR11 clade	Clade I	Clade Ia	Unassigned
06466f9731dc62b457420bf214f2e658	0	0	0	0	0	0	0.0481928	0	0	0	Bacteria	Proteobacteria	Deltaproteobacteria	SAR324 clade(Marine group B)	Unassigned	Unassigned	Unassigned
065a1f1dc71825987b670ddcfa4b2acd	0	0	0	0	0	0	0.0542169	0	0	0	Bacteria	Proteobacteria	Deltaproteobacteria	SAR324 clade(Marine group B)	Unassigned	Unassigned	Unassigned
065df08784aef9e70ea9dd3a56ed300c	0	0	0	0	0	0	0.0361446	0	0	0	Bacteria	Proteobacteria	Gammaproteobacteria	Alteromonadales	Alteromonadaceae	Rheinheimera	uncultured bacterium
06d26693c2fc808b6e2bed326b65b112	0	0	0	0	0	0	0	0	0	0.060241	Bacteria	Proteobacteria	Deltaproteobacteria	Bdellovibrionales	Bacteriovoracaceae	Unassigned	Unassigned
0702990aaade54537c49956cd7e9a084	0	0	0	0	0	0	0.0361446	0	0	0	Bacteria	Verrucomicrobia	Verrucomicrobiae	Verrucomicrobiales	Rubritaleaceae	Rubritalea	uncultured bacterium
070c4b1e009e45608f78b0fb1d11f884	0	0	0	0	0.0180723	0	0	0	0	0	Bacteria	Proteobacteria	Alphaproteobacteria	Rhizobiales	Hyphomicrobiaceae	Filomicrobium	uncultured bacterium
073d2da1b2f2df7239df61d5db108486	0.26506	0.156627	0	0	0	0	0	0	0	0	Bacteria	Proteobacteria	Deltaproteobacteria	Desulfobacterales	Desulfobacteraceae	Desulfocella	Unassigned
0771764dfea25a9289a6ea17b35cc18d	0.0843373	0	0.150602	0	0	0	0	0	0	0	Bacteria	Proteobacteria	Gammaproteobacteria	Oceanospirillales	Nitrincolaceae	Unassigned	Unassigned
079e4ea2b4756f14f0e22501ed42375f	0	0.680723	0	0	0	0	0	0	0	0	Bacteria	Proteobacteria	Gammaproteobacteria	Vibrionales	Vibrionaceae	Vibrio	Unassigned
08390fc1f131a6de65917740c04a5ac6	0.0361446	0	0	0	0	0	0	0.0903614	0.0180723	0	Bacteria	Proteobacteria	Gammaproteobacteria	Betaproteobacteriales	Burkholderiaceae	Tepidimonas	Unassigned
088f22f0459f18a05f206527d2583ca7	0	0	0	0	0	0.0240964	0	0	0	0	Bacteria	Proteobacteria	Gammaproteobacteria	Oceanospirillales	Unassigned	Unassigned	Unassigned
089115c9d8c810e1146f438e652272cb	0.240964	0.216867	0	0.126506	0	0.493976	0.536145	0.120482	0	1.12651	Bacteria	Bacteroidetes	Bacteroidia	Flavobacteriales	Flavobacteriaceae	NS5 marine group	Unassigned
08c5406da572e5ad39bf1b8008d3869a	0.0421687	0	0	0	0	0	0	0	0	0	Bacteria	Armatimonadetes	Fimbriimonadia	Fimbriimonadales	Fimbriimonadaceae	uncultured bacterium	uncultured bacterium
09223f40126291ae4a3a065f212e95df	0	0	0.0120482	0	0	0	0	0	0	0	Bacteria	Bacteroidetes	Bacteroidia	Unassigned	Unassigned	Unassigned	Unassigned
09241972e4b24858b245ec7f6c3acba3	0	0	0	0	0	0	0.0722892	0	0	0	Bacteria	Proteobacteria	Alphaproteobacteria	Rhodobacterales	Rhodobacteraceae	Loktanella	Unassigned
095f332e0274a40f48b65c1b604495e4	0	0	0	0	0	0	0	0	0.0542169	0	Bacteria	Proteobacteria	Gammaproteobacteria	Pseudomonadales	Pseudomonadaceae	Pseudomonas	uncultured bacterium
09bfcea6efa9aef165d8c4c5cfd06432	0	0	0	0	0	0.0361446	0	0	0	0	Bacteria	Bacteroidetes	Bacteroidia	Flavobacteriales	Flavobacteriaceae	Unassigned	Unassigned
09d574e77ef8808a18bab13813cc4e1e	0	4.51807	0	0	0	0	0	0	0	0	Bacteria	Bacteroidetes	Bacteroidia	Bacteroidales	Prolixibacteraceae	Roseimarinus	uncultured Bacteroidetes bacterium
09eb26cd2177b4a3c0d860a3ce7211a4	0	0	0	0	0	0	0	0.289157	0	0	Bacteria	Proteobacteria	Alphaproteobacteria	Rhodovibrionales	Kiloniellaceae	uncultured	Unassigned
0b08e1422c4b23c358c1ad6dc23878a7	0.0240964	0	0	0	0	0	0	0	0	0	Bacteria	Proteobacteria	Deltaproteobacteria	Bdellovibrionales	Bdellovibrionaceae	OM27 clade	Unassigned
0b285a07e5aa1f0862145ad6e04944dd	0	0	0	0	0	0	0.0180723	0	0	0	Bacteria	Proteobacteria	Gammaproteobacteria	SAR86 clade	uncultured bacterium	uncultured bacterium	uncultured bacterium
0b2c6e44aacd8361bae82a67a6bc3e7d	0	0	0	0	0	0	0	0	0.138554	0	Bacteria	Proteobacteria	Gammaproteobacteria	Betaproteobacteriales	Neisseriaceae	uncultured	uncultured bacterium
0b492506fa0c492e1f15358d163b02d5	0	0	0	0.0903614	0	0	0	0	0	0	Bacteria	Actinobacteria	Actinobacteria	Micromonosporales	Micromonosporaceae	Actinoplanes	Unassigned
0b8c5c53c555e9d7114f7de57ccc1ec4	0	0	0	0	0	0	0.0361446	0	0	0	Bacteria	Proteobacteria	Alphaproteobacteria	Caulobacterales	Hyphomonadaceae	uncultured	Unassigned
0c11e1b32e37d02b71d64a7ceb16693f	0.0662651	0	0	0	0	0	0	0	0	0	Bacteria	Acidobacteria	Blastocatellia (Subgroup 4)	Blastocatellales	Blastocatellaceae	Blastocatella	uncultured bacterium
0c1406f55c27a8bacb1d1597451f8eec	0	0	0	0	0	0	0	0.144578	0	0	Bacteria	Proteobacteria	Gammaproteobacteria	Pseudomonadales	Moraxellaceae	Acinetobacter	Unassigned
0c40a5d16843d45c01f709318672a5a6	0.0301205	0	0	0	0	0	0	0	0	0	Bacteria	Firmicutes	Bacilli	Bacillales	Paenibacillaceae	Paenibacillus	Paenibacillus barengoltzii
0c49444211e915a48d73fcb7a3fbe155	0	0	0	0	0	0.0481928	0	0	0	0	Bacteria	Proteobacteria	Alphaproteobacteria	Micavibrionales	uncultured	uncultured bacterium	uncultured bacterium
0c6010caa991788de40391f6d250c16e	0	0	0	0	0	0	0	0	0.0903614	0	Bacteria	Proteobacteria	Gammaproteobacteria	Pseudomonadales	Moraxellaceae	Acinetobacter	Unassigned
0c67d21919f6497c083a7864a0bd0f00	0	0.060241	0	0	0	0	0	0	0	0	Bacteria	Proteobacteria	Gammaproteobacteria	Betaproteobacteriales	Neisseriaceae	Neisseria	uncultured bacterium
0d1afc84b280be5ff311a5b12cd32005	0.373494	0	0	0	0	0.204819	0	0	0	0.198795	Bacteria	Bacteroidetes	Bacteroidia	Flavobacteriales	Flavobacteriaceae	NS5 marine group	Unassigned
0d62cc1eae2d64982a4a5ce11cf40e5b	0	0	0	0	0	0	0	0	0	0.0542169	Bacteria	Proteobacteria	Gammaproteobacteria	Betaproteobacteriales	Burkholderiaceae	MWH-UniP1 aquatic group	Unassigned
0e2d6db116027594d413f776d77baca0	0	0	0	0.289157	0.0060241	2.06024	0.626506	0.415663	0	1.0241	Bacteria	Proteobacteria	Alphaproteobacteria	SAR11 clade	Clade I	Clade Ia	Unassigned
0e3d19b8b7320176872026882eed72bc	0	0	0	0	0.060241	0	0	0	0	0	Bacteria	Marinimicrobia (SAR406 clade)	uncultured bacterium	uncultured bacterium	uncultured bacterium	uncultured bacterium	uncultured bacterium
0e9611aebf833986bce135b7d43816ae	0.0662651	0	0	0	0	0	0	0	0	0	Bacteria	Patescibacteria	Saccharimonadia	Saccharimonadales	uncultured bacterium	uncultured bacterium	uncultured bacterium
0e99a3d113fc82e1441d169f2233b124	0	0	0	0	0	0.0240964	0	0	0	0	Bacteria	Cyanobacteria	Oxyphotobacteria	Synechococcales	Cyanobiaceae	Synechococcus CC9902	Unassigned
0ed327fedb63817c10c1c7f8722ee59b	0	0	0	0	0	0.0361446	0	0	0	0	Bacteria	Bacteroidetes	Bacteroidia	Unassigned	Unassigned	Unassigned	Unassigned
0eed3f2c5cecc2227bb503103433fb1c	0	0.0481928	0	0	0	0	0	0	0	0	Bacteria	Bacteroidetes	Bacteroidia	Flavobacteriales	NS9 marine group	uncultured bacterium	uncultured bacterium
0ef848df23b2c110d315ba2ae3d05aae	0	0	0.536145	0	0	0	0	0	0	0	Bacteria	Proteobacteria	Gammaproteobacteria	Vibrionales	Vibrionaceae	Vibrio	Unassigned
0f4bb60c6aefc5892f22047356d779f9	0	0	0	0.10241	0	0	0	0	0	0	Bacteria	Proteobacteria	Gammaproteobacteria	SAR86 clade	Unassigned	Unassigned	Unassigned
0f8a4971749976546e3eb8af581081b5	0.0361446	0	0	0	0	0	0	0	0	0	Bacteria	Actinobacteria	Acidimicrobiia	Microtrichales	Microtrichaceae	Sva0996 marine group	Unassigned
0f9ec750575736c2d68dc12936f2ab18	0	0	0	0	0	0.0120482	0	0	0	0	Bacteria	Proteobacteria	Deltaproteobacteria	Bdellovibrionales	Bdellovibrionaceae	OM27 clade	uncultured bacterium
0faa1ea46aaa396b421405a82381b4df	0	0	0	0	0	0.0120482	0	0	0	0	Bacteria	Proteobacteria	Alphaproteobacteria	Puniceispirillales	SAR116 clade	uncultured bacterium	uncultured bacterium
0fad08b7a114f5c006e5e5887376ecc8	0	0	0	0	0.120482	0	0	0	0	0	Archaea	Diapherotrites	Iainarchaeia	Iainarchaeales	Unassigned	Unassigned	Unassigned
0ff531918ce1b22088027481f32b71a9	0	0	0	0.0662651	0	0	0.228916	0	0	0	Bacteria	Firmicutes	Bacilli	Bacillales	Bacillaceae	Bacillus	Unassigned
10195c21d8ff0ab5190c876bd2a18285	0	0	0	0	0	0.198795	0.0240964	0	0	0.0662651	Bacteria	Proteobacteria	Alphaproteobacteria	SAR11 clade	Clade IV	uncultured bacterium	uncultured bacterium
1020d3f16febc67267e399d4479a133b	0	2.07831	0	0	0	0	0	0	0	0	Bacteria	Proteobacteria	Gammaproteobacteria	Alteromonadales	Shewanellaceae	Ferrimonas	Unassigned
1059464fdfe589cd48f28ef36937ecc8	0	0	0	0	0	0	0	0	0	0.0240964	Bacteria	Bacteroidetes	Bacteroidia	Bacteroidales	Prolixibacteraceae	Roseimarinus	uncultured Bacteroidetes bacterium
106074907c9e151d3db84a51d7d0110b	0	0	0	0	0	0.0301205	0	0	0	0	Bacteria	Proteobacteria	Gammaproteobacteria	Ectothiorhodospirales	Thioalkalispiraceae	Thiohalophilus	uncultured bacterium
108fa9baad12e7eaad1475e80929b7fd	0	0	0	0	0	0	0	0.0662651	0	0	Bacteria	Bacteroidetes	Bacteroidia	Flavobacteriales	Flavobacteriaceae	NS5 marine group	Unassigned
10ba022844513773a2c68d9503ab4b3a	0	0	0	0	0	0	0.0421687	0	0	0	Bacteria	Bacteroidetes	Bacteroidia	Chitinophagales	uncultured	Unassigned	Unassigned
11092b60b276088cee651f45102eee06	0	0	0	0	0	0	0.144578	0	0	0	Bacteria	Proteobacteria	Alphaproteobacteria	Puniceispirillales	SAR116 clade	uncultured bacterium	uncultured bacterium
115e31b945eb3d6cce3fddf43e502dcc	0	0	0	0	0	0.0180723	0	0	0	0	Bacteria	Margulisbacteria	Unassigned	Unassigned	Unassigned	Unassigned	Unassigned
11652534edfc7fdc3fc7f787f8682ef9	0	0	0.0481928	0	0	0	0	0	0	0	Bacteria	Bacteroidetes	Bacteroidia	Bacteroidales	Prolixibacteraceae	Sunxiuqinia	Unassigned
11a444a8c2abeada17ac2a5d0abc9728	0.0421687	0	0	0	0	0	0	0	0	0	Bacteria	Proteobacteria	Gammaproteobacteria	Cellvibrionales	Cellvibrionaceae	Unassigned	Unassigned
11e964a7599af69ba5f774a9894a6ec4	0	0	0	0	0	0	0.10241	0	0	0	Bacteria	Proteobacteria	Alphaproteobacteria	Rhodovibrionales	Kiloniellaceae	Kiloniella	Unassigned
12bd3fb22bf7728400ea54e83d3d4f2d	0	0	0	0	0	0	0	0	0.0722892	0	Bacteria	Proteobacteria	Gammaproteobacteria	Pseudomonadales	Pseudomonadaceae	Pseudomonas	Unassigned
1315571f4ea85039f97bf07356c1c387	0	0	0	0	0	0.0240964	0	0	0	0	Bacteria	Proteobacteria	Alphaproteobacteria	SAR11 clade	Clade I	Clade Ia	Unassigned
132c1cd22813c262e022a6d176a5bbad	0.0421687	0	0	0	0	0	0	0	0	0	Bacteria	Proteobacteria	Alphaproteobacteria	Rhizobiales	Beijerinckiaceae	Chelatococcus	Unassigned
133c80b751fdf6713a14530416d8a990	0.0301205	0	0	0	0	0	0	0	0	0	Bacteria	Chloroflexi	Anaerolineae	Anaerolineales	Anaerolineaceae	uncultured	uncultured bacterium
1366fbf3d7ae7f8ad35ff11070bf901e	0	0	0	0	0	0	0	0	0	0.240964	Bacteria	Proteobacteria	Alphaproteobacteria	Puniceispirillales	SAR116 clade	Unassigned	Unassigned
13c09dee695e75c58fd94c2e8b602a2b	0.0421687	0	0	0	0.0722892	0	0	0	0	0	Bacteria	Bacteroidetes	Bacteroidia	Flavobacteriales	NS9 marine group	Unassigned	Unassigned
14149da5006c90e2aa4f443d919f502e	0	0	0	0	0	0	0.060241	0	0	0	Bacteria	Bacteroidetes	Chlorobia	Chlorobiales	Chlorobiaceae	Prosthecochloris	Unassigned
14321e587e63cff86fe6a8851228338b	0	0	0	0	0	0.0180723	0	0	0	0	Bacteria	Proteobacteria	Alphaproteobacteria	Puniceispirillales	SAR116 clade	Unassigned	Unassigned
145a36ac6574b8268bd3f73fba08540c	0	0	0	0	0	0	0	0	0	0.0301205	Bacteria	Cyanobacteria	Oxyphotobacteria	Nostocales	Unassigned	Unassigned	Unassigned
14bddcb52aab2efdc4d488d2bfc52401	0	0	0	0	0	0	0	0	0	0.0180723	Bacteria	Bacteroidetes	Bacteroidia	Bacteroidales	Prolixibacteraceae	Unassigned	Unassigned
14dbb9f8af307e6c029c7b2b79381682	0	0	0	0	0	0	0.060241	0	0	0	Bacteria	Firmicutes	Bacilli	Bacillales	Staphylococcaceae	Staphylococcus	Unassigned
14f8deb0dc468efebc25aec63859ea4d	0	0	0.0662651	0	0	0	0	0	0	0	Bacteria	Bacteroidetes	Bacteroidia	Cytophagales	Cyclobacteriaceae	Fabibacter	Unassigned
152b6e29275de4b60f70421c69f0ea55	0	0	0	0	0	0.0301205	0	0	0	0	Bacteria	Proteobacteria	Alphaproteobacteria	Unassigned	Unassigned	Unassigned	Unassigned
156f265b35ac12d16a51167e47082a0d	0	0	0	0	0	0.0120482	0	0	0	0	Bacteria	Bacteroidetes	Bacteroidia	Flavobacteriales	NS9 marine group	Unassigned	Unassigned
163108f26f824a6e30742f9a636d03dc	0	0	0	0	0	0	0.168675	0	0	0	Bacteria	Proteobacteria	Gammaproteobacteria	Pseudomonadales	Pseudomonadaceae	Pseudomonas	Unassigned
16380b2aaea08c54c56dc6d01ac2d58a	0	0	0	0	0	0.0120482	0	0	0	0	Bacteria	Proteobacteria	Alphaproteobacteria	Puniceispirillales	SAR116 clade	uncultured bacterium	uncultured bacterium
164fa58110d559a296abe5bccb63afb2	0	0	0	0	0	0.0120482	0	0	0	0	Bacteria	Bacteroidetes	Bacteroidia	Flavobacteriales	Flavobacteriaceae	NS5 marine group	uncultured Flavobacteriaceae bacterium
1652aaef2e0b04f4d65c0c0b0b4a8cb7	0	0	0	0	0	0	0	0	0	0.0963855	Bacteria	Proteobacteria	Gammaproteobacteria	Alteromonadales	Alteromonadaceae	Alteromonas	Unassigned
165bfbed1a763c2e336c79d6270490d4	0	0	0	0	0	0.0120482	0	0	0	0	Bacteria	Bacteroidetes	Bacteroidia	Flavobacteriales	NS9 marine group	Unassigned	Unassigned
167686a87c2060cd0800be5d7c513086	0	0	0	0	0	0	0.271084	0	0	0	Bacteria	Proteobacteria	Gammaproteobacteria	Pseudomonadales	Moraxellaceae	Acinetobacter	Unassigned
16eb8dc64a71c3d343f86b462a409294	1.09036	0	0	0	0	0	0	0	0	0	Bacteria	Firmicutes	Bacilli	Bacillales	Bacillaceae	Bacillus	Unassigned
1726f9b43c78f61a25e46f7967746dd6	0	0	0	0	0	0	0	0.0722892	0	0	Bacteria	Firmicutes	Clostridia	Clostridiales	Clostridiaceae 4	Unassigned	Unassigned
174056fc9aa4c28ad4e256a6aa9e1180	0	0	0.686747	0	0	0	0	0	0	0	Bacteria	Bacteroidetes	Bacteroidia	Sphingobacteriales	Lentimicrobiaceae	uncultured bacterium	uncultured bacterium
176268e65d68171331d66f49d3a5b0c3	0	0	0	0	0	0.0120482	0	0	0	0	Bacteria	Bacteroidetes	Bacteroidia	Chitinophagales	Saprospiraceae	uncultured	Unassigned
17754bb7a9697d189ce0c81e93e96760	0	0	0.475904	0	0	0	0	0	0	0	Bacteria	Firmicutes	Clostridia	Clostridiales	Clostridiaceae 1	Unassigned	Unassigned
17e964e0ec1bd377d5f1a4af1998e76a	0	0	0	0	0	0.373494	0	0	0	0	Bacteria	Actinobacteria	Acidimicrobiia	Actinomarinales	Actinomarinaceae	Candidatus Actinomarina	uncultured bacterium
1806947dd8c1d3bba7247ffba0c9ae80	0.0120482	0	0	0	0	0	0	0	0	0	Bacteria	Firmicutes	Clostridia	Clostridiales	Eubacteriaceae	Anaerofustis	uncultured bacterium
181d355068056fdf66fbcafc3e5f4fb5	0	0	0	0	0	0.0240964	0	0	0	0	Bacteria	Bacteroidetes	Bacteroidia	Flavobacteriales	Flavobacteriaceae	NS5 marine group	uncultured Flavobacteriaceae bacterium
183c20d1d5f2b44bf3e33ad9c9d839ea	0	0	0	0	0	0	0	0	0	0.0240964	Bacteria	Proteobacteria	Alphaproteobacteria	Rhodospirillales	Unassigned	Unassigned	Unassigned
187cc8036e15ce90aa0ce41d5694fabe	0	0	0	0.0481928	0	0	0	0	0	0	Bacteria	Epsilonbacteraeota	Campylobacteria	Campylobacterales	Arcobacteraceae	Arcobacter	uncultured bacterium
188716a50cdf9b9e2c7cfcac9d4e13ee	0	0.0783133	0	0	0	0	0	0	0	0	Bacteria	Bacteroidetes	Bacteroidia	Flavobacteriales	Cryomorphaceae	uncultured	Unassigned
18c08993018fc4c06c8cc38508568b91	0	0	0	0	0.150602	0	0.0722892	0	0	0	Bacteria	Bacteroidetes	Bacteroidia	Flavobacteriales	Weeksellaceae	Empedobacter	Unassigned
19156e0c6de21d10850122825cc86426	0	0	0	0	0	0	0.0301205	0	0	0	Bacteria	Bacteroidetes	Bacteroidia	Chitinophagales	Saprospiraceae	uncultured	Unassigned
19306cebaed358d54d17f648c2533070	0	0	0	0.10241	0	0	0	0	0	0	Bacteria	Proteobacteria	Gammaproteobacteria	Gammaproteobacteria Incertae Sedis	Unknown Family	Candidatus Berkiella	Unassigned
19ecb2178820c349f4958b7c3bc41c2b	3.86145	0	0	0	0	0	0	0	0.313253	0	Bacteria	Bacteroidetes	Bacteroidia	Flavobacteriales	Flavobacteriaceae	Maritimimonas	Unassigned
19f2bc01c6005d92aecced644a9dfb50	0	0	0	0.10241	0.0903614	0.246988	0	0.198795	0	0.162651	Bacteria	Proteobacteria	Alphaproteobacteria	Puniceispirillales	SAR116 clade	Unassigned	Unassigned
1a25ee2da12fce5a9759cba50491ac2b	0.0421687	0	0	0	0	0.524096	0.0963855	0.0662651	0.10241	0.253012	Bacteria	Bacteroidetes	Bacteroidia	Flavobacteriales	NS9 marine group	Unassigned	Unassigned
1a76333d11736690093d28909791da78	0	0	0	0	0	0.0120482	0	0	0	0	Bacteria	Planctomycetes	Phycisphaerae	Phycisphaerales	Phycisphaeraceae	JL-ETNP-F27	Unassigned
1a7b207d4f56acefef55f6c5078fa22d	0	0	0	0	0	0.0180723	0	0	0	0	Bacteria	Bacteroidetes	Bacteroidia	Flavobacteriales	Flavobacteriaceae	NS5 marine group	uncultured Flavobacteriaceae bacterium
1a99a8bd863cacfdc416098d58b780a4	0	0	0	0	0	0.0120482	0	0	0	0	Bacteria	Actinobacteria	Acidimicrobiia	Actinomarinales	Actinomarinaceae	Candidatus Actinomarina	Unassigned
1ac180eedfed699252d69ca699b4a6a0	0	0	0	0	0	0	0	0	0	0.0361446	Bacteria	Verrucomicrobia	Verrucomicrobiae	Opitutales	Puniceicoccaceae	Lentimonas	uncultured bacterium
1ac4ee24f08de26b6012003dddbf245e	0	0	0	0	0	0.0120482	0	0	0	0	Bacteria	Proteobacteria	Alphaproteobacteria	SAR11 clade	Clade III	Unassigned	Unassigned
1af6ce83dd358dc61390040e7f2ca415	0	0	0	0.0240964	0	0	0	0	0	0	Bacteria	Proteobacteria	Gammaproteobacteria	Cellvibrionales	Spongiibacteraceae	BD1-7 clade	uncultured bacterium
1b1689a8bddc3eaf6a00d16f048ff8f8	0.126506	0	0	0.120482	0	0.409639	0.0963855	0.150602	0	0.192771	Bacteria	Proteobacteria	Alphaproteobacteria	Rhodospirillales	AEGEAN-169 marine group	uncultured bacterium	uncultured bacterium
1bc3cf3bc57ae1a3b9b837093b35bfc3	0	0	0	0	0.174699	0	0	0	0	0	Bacteria	Proteobacteria	Alphaproteobacteria	Rhodospirillales	AEGEAN-169 marine group	Unassigned	Unassigned
1bd32b41664d375ec594f1a8f9c27827	0	0	0	0	0.313253	0	0	0	0.144578	0	Bacteria	Bacteroidetes	Bacteroidia	Cytophagales	Cyclobacteriaceae	Fabibacter	Unassigned
1bf6a1a22e7fc68b6ac3c4f7b78758ae	0	0	0	0	0	0	0	0.144578	0	0	Bacteria	Proteobacteria	Alphaproteobacteria	Puniceispirillales	SAR116 clade	Unassigned	Unassigned
1c64e7cabdf79df23dd3aa3eff079460	0	0	0	0.0421687	0	0	0	0	0.0481928	0	Bacteria	Actinobacteria	Actinobacteria	Corynebacteriales	Corynebacteriaceae	Corynebacterium 1	Unassigned
1ca07a2a09e2e52cc750c3711cb507b0	0.457831	0.795181	0	1.54819	1.64458	0	1.11446	1.40964	1.27711	0	Bacteria	Proteobacteria	Gammaproteobacteria	Oceanospirillales	Endozoicomonadaceae	Endozoicomonas	uncultured bacterium
1cc80199357d386fd676d9fb91484e2f	0	0	0	0.156627	0	0	0.0843373	0	0	0	Bacteria	Actinobacteria	Actinobacteria	Micrococcales	Micrococcaceae	Arthrobacter	Unassigned
1cf7aa98141476e169bbea994395f0e1	0	0	0	0.0722892	0	0	0	0	0	0	Bacteria	Proteobacteria	Gammaproteobacteria	Aeromonadales	Aeromonadaceae	Oceanisphaera	Unassigned
1d3fef25e614a3c05e75f1d20c4ff38b	0.0240964	0	0	0	0	0	0	0	0	0	Bacteria	Bacteroidetes	Bacteroidia	Bacteroidales	Bacteroidetes vadinHA17	uncultured bacterium	uncultured bacterium
1d4348bc7aac75ab3bd6e15ed1ecd228	0	0	0	0	0	0.0240964	0	0	0	0	Bacteria	Verrucomicrobia	Verrucomicrobiae	Verrucomicrobiales	Rubritaleaceae	Rubritalea	Unassigned
1d546ca14415f59d1df24bdfdf53d8fb	0	0	0	0.120482	0	0	0	0	0	0	Bacteria	Proteobacteria	Gammaproteobacteria	Alteromonadales	Psychromonadaceae	Agarivorans	Unassigned
1d6016986ef039af25a5443690acf64e	0	0	0	0	0	0	0.0180723	0	0	0	Bacteria	Proteobacteria	Alphaproteobacteria	Rhodovibrionales	Kiloniellaceae	uncultured	uncultured bacterium
1d66e9eaf0a650f2479db077896a0473	0	0	0	0	0	0	0	0.421687	0	0	Bacteria	Firmicutes	Clostridia	Clostridiales	Peptococcaceae	BRH-c8a	Unassigned
1d823bc06b145068a57f63ba5b567f3b	0	0	0	0	0	0.0120482	0	0	0	0	Bacteria	Proteobacteria	Alphaproteobacteria	Puniceispirillales	SAR116 clade	Unassigned	Unassigned
1df7100e497de8dd369f4244502f73d4	0	0	0	0	0	0	0	0	0	0.0722892	Bacteria	Proteobacteria	Gammaproteobacteria	Pseudomonadales	Pseudomonadaceae	Pseudomonas	Unassigned
1e80c63d58fb3ddf2307560cafe616e9	0	0	0	0	0	0	0.0903614	0	0	0	Bacteria	Fusobacteria	Fusobacteriia	Fusobacteriales	Fusobacteriaceae	Propionigenium	Unassigned
1e837ab48b6e640f5d4205e8ff15431b	0.0180723	0	0	0	0	0	0	0	0	0	Bacteria	Patescibacteria	ABY1	Candidatus Uhrbacteria	uncultured bacterium	uncultured bacterium	uncultured bacterium
1e9b9a12c93391737192c3e76c20d660	0.0963855	0	0	0.168675	0	0.210843	0.126506	0	0.0963855	0.415663	Bacteria	Bacteroidetes	Bacteroidia	Flavobacteriales	Flavobacteriaceae	NS5 marine group	uncultured Flavobacteriaceae bacterium
1ecd26f8cf2ce29981075598884456af	0	0	0	0	0	0	0	0.114458	0	0	Bacteria	Firmicutes	Clostridia	Clostridiales	TSAC18	uncultured Clostridia bacterium	uncultured Clostridia bacterium
1efd1a2bbc76e3bdec552486d08c7bdf	0	0	0	0	0	0	0	0	0	0.10241	Bacteria	Proteobacteria	Gammaproteobacteria	Alteromonadales	Pseudoalteromonadaceae	Pseudoalteromonas	Unassigned
1fff3430e8d1defcaa99f594a4ce26a4	0.0301205	0	0	0	0	0	0	0	0	0	Bacteria	Actinobacteria	Acidimicrobiia	Microtrichales	Microtrichaceae	Sva0996 marine group	uncultured bacterium
2006bc0a6e13cc80e3d0b9b354bf25dd	0	0	0	0	0	0.0361446	0	0	0	0	Bacteria	Proteobacteria	Deltaproteobacteria	Myxococcales	BIrii41	Unassigned	Unassigned
202722e26bffa332b215bbd8525dc253	0.174699	0	0	0.156627	0	0	0.277108	0.23494	0	0	Bacteria	Firmicutes	Bacilli	Bacillales	Staphylococcaceae	Staphylococcus	uncultured bacterium
202ae1bfb291c6d6cfdd26f22d7bfab9	0	0	0	0	0	0.0120482	0	0	0	0	Bacteria	Bacteroidetes	Bacteroidia	Flavobacteriales	Cryomorphaceae	NS10 marine group	Unassigned
206d6d3bc495dbcd1a5438f6d2ce4000	0.060241	0	0	0	0	0	0	0	0	0	Bacteria	Proteobacteria	Alphaproteobacteria	Rickettsiales	Midichloriaceae	MD3-55	uncultured bacterium
206d857bf2b06c2678e7ba8ff7b4980f	0	0	0	0	0	0.060241	0	0	0	0	Bacteria	Proteobacteria	Alphaproteobacteria	Caulobacterales	Caulobacteraceae	Brevundimonas	Unassigned
2077e293e4decb5e6d56bfeca856089f	0	0	0.807229	0	0	0	0	0	0	0	Bacteria	Firmicutes	Clostridia	Clostridiales	Clostridiaceae 1	Unassigned	Unassigned
2085c6b84f1dfb36df7184cb34dd1489	0	0	0	0	0	0	0	0	0.0120482	0	Bacteria	Calditrichaeota	Calditrichia	Calditrichales	Calditrichaceae	Caldithrix	Unassigned
20c21cd0ea41763e265cda8fa922317d	0	0.518072	0.0421687	0	0	0	0	0	0	0	Bacteria	Proteobacteria	Gammaproteobacteria	Alteromonadales	Shewanellaceae	Ferrimonas	Unassigned
211632a2849ee9b5af54226ca024c9e6	0	0	0	0.0361446	0	0	0	0	0	0	Bacteria	Proteobacteria	Deltaproteobacteria	Desulfobacterales	Desulfobacteraceae	Desulfococcus	Unassigned
2184cf799632fa43256a7771e3a780e6	0	0	0	0.0542169	0	0	0	0	0	0	Bacteria	Proteobacteria	Gammaproteobacteria	Vibrionales	Vibrionaceae	Vibrio	Unassigned
21ce87416c3411754718bd7256655231	0	0	0.626506	0	0	0	2.28916	0	0	0	Bacteria	Bacteroidetes	Chlorobia	Chlorobiales	Chlorobiaceae	Chlorobium	Unassigned
227d0e36421ae321ed34b5a13924a4ff	0	0	0	0	0	0	0	0	0.0542169	0	Bacteria	Acidobacteria	Blastocatellia (Subgroup 4)	Blastocatellales	Blastocatellaceae	Blastocatella	uncultured bacterium
22df09bbe2dfa82d89a0a6dad96d5135	0	0	0	0	0	0	0	0.343373	0	0.240964	Bacteria	Bacteroidetes	Bacteroidia	Flavobacteriales	Flavobacteriaceae	NS2b marine group	Unassigned
235156243f24789023497401820f609b	0	0.0301205	0	0	0	0	0	0	0	0	Bacteria	Proteobacteria	Gammaproteobacteria	Alteromonadales	Shewanellaceae	Shewanella	Unassigned
236541bcd7c3abd478412aa4c26996cf	0.0240964	0	0	0	0	0	0	0	0	0	Bacteria	Proteobacteria	Gammaproteobacteria	Cellvibrionales	Halieaceae	OM60(NOR5) clade	uncultured bacterium
237957ace2baad34a1f081c7f46caff6	0	0	0.0421687	0	0	0	0	0	0	0	Bacteria	Bacteroidetes	Bacteroidia	Cytophagales	Amoebophilaceae	uncultured	uncultured bacterium
23e3235b17f6cf6fbe31ba588f4a2865	0	0.0240964	0	0	0	0	0	0	0	0	Bacteria	Bacteroidetes	Bacteroidia	Cytophagales	Cyclobacteriaceae	Fulvivirga	Unassigned
2422a72700bc25bf3c9bd644ecf44bfe	0.0120482	0	0	0	0	0	0	0	0	0	Bacteria	Proteobacteria	Gammaproteobacteria	Vibrionales	Vibrionaceae	Vibrio	Unassigned
24be488abac3e53287e8f66e616bf5ad	0	0	0	0.138554	0	0	0	0	0	0	Bacteria	Proteobacteria	Gammaproteobacteria	Oceanospirillales	Endozoicomonadaceae	Endozoicomonas	uncultured bacterium
24fd1e47797e9c043b10bda99092e707	0	0	0	0	0	0.0180723	0	0	0	0	Bacteria	Bacteroidetes	Bacteroidia	Flavobacteriales	Flavobacteriaceae	Tenacibaculum	Unassigned
2521de47af144699381283eb57679d34	0	0	0	0	0	0	0	0.198795	0	0	Bacteria	Proteobacteria	Alphaproteobacteria	Thalassobaculales	uncultured	Unassigned	Unassigned
25556f3fd26eb6b1b3101f9264f76609	0	0	0	0	0	0.0120482	0	0	0	0	Bacteria	Firmicutes	Clostridia	Clostridiales	Family XII	Fusibacter	uncultured bacterium
2585e5af5dc76aeb01d77d67e0190495	0	0	0	0	0.0060241	0	0	0	0	0	Bacteria	Bacteroidetes	Bacteroidia	Bacteroidales	Prolixibacteraceae	Roseimarinus	Unassigned
259603771cdd546d737eac33f29063af	0	0	0	0	0	0	0.740964	0	0	0	Bacteria	Patescibacteria	Gracilibacteria	uncultured bacterium	uncultured bacterium	uncultured bacterium	uncultured bacterium
262da3aa7ab3eef5cc1574e5ba5ef30f	0	0	0	0	0	0	0.060241	0.0421687	0	0	Bacteria	Bacteroidetes	Bacteroidia	Cytophagales	Cyclobacteriaceae	uncultured	uncultured bacterium
2664d061a69d4a88594127e008db6867	0.0542169	0	0	0	0	0.13253	0	0	0.0963855	0.0843373	Bacteria	Bacteroidetes	Bacteroidia	Flavobacteriales	Flavobacteriaceae	uncultured	Unassigned
26b04cd9ee6393fb81c32d1931165e42	0	0	0	0.13253	0	0	0	0	0	0	Bacteria	Proteobacteria	Gammaproteobacteria	Pseudomonadales	Moraxellaceae	Acinetobacter	Unassigned
26e608c97ee4d0e5c011537146d90921	0	0	0	0	0	0	0	0	0	0.0542169	Bacteria	Marinimicrobia (SAR406 clade)	uncultured bacterium	uncultured bacterium	uncultured bacterium	uncultured bacterium	uncultured bacterium
270794b704c84d503867ad4ec6163cfd	0	0	0	0	0	0	0.108434	0	0	0	Bacteria	Proteobacteria	Deltaproteobacteria	Desulfobacterales	Desulfobacteraceae	Unassigned	Unassigned
2757220189f4c39004ba0188c2e17ed2	0	0	0	0	0	0	0	0	0	0.0240964	Bacteria	Bacteroidetes	Bacteroidia	Flavobacteriales	Flavobacteriaceae	Algitalea	Unassigned
2762db914612a4ff1af70cf273b38733	0	0	0	0.228916	0	0	0	0	0	0	Bacteria	Bacteroidetes	Bacteroidia	Flavobacteriales	Flavobacteriaceae	NS4 marine group	Unassigned
276f23b8be06fbfff804041c216e5194	0	0	0	0	0	0	0	0	0.0542169	0	Bacteria	Patescibacteria	Gracilibacteria	uncultured bacterium	uncultured bacterium	uncultured bacterium	uncultured bacterium
27d06521bb6d37bafb252736a5ec3a18	0	0	3.61446	0	0	0	0	0	0	0	Bacteria	Bacteroidetes	Bacteroidia	Bacteroidales	Prolixibacteraceae	Roseimarinus	uncultured Bacteroidetes bacterium
2809b9283f9617a441b3c8a94b82589d	0	0	0	0	0	0	0	0	0.0722892	0	Bacteria	Proteobacteria	Alphaproteobacteria	Sphingomonadales	Sphingomonadaceae	Sphingomonas	Unassigned
281ac826dc2cd60e995df04d7f312673	0	0	0	0	0.120482	0.0662651	0	0	0	0.0240964	Bacteria	Proteobacteria	Alphaproteobacteria	Rhodobacterales	Rhodobacteraceae	uncultured	uncultured bacterium
28f54ff5b0cf30469d0525a3210e719a	0	0	0	0.0240964	0	0	0	0	0	0	Bacteria	Epsilonbacteraeota	Campylobacteria	Campylobacterales	Unassigned	Unassigned	Unassigned
291c073bc632383ba2aff61030248546	0	0	0	0	0	0.0301205	0	0	0	0	Bacteria	Verrucomicrobia	Verrucomicrobiae	Verrucomicrobiales	Rubritaleaceae	Rubritalea	Unassigned
29224a8c5c72a6132fa4b426c50ffd42	0	0	0	0	0	0.168675	0	0	0	0	Bacteria	Proteobacteria	Alphaproteobacteria	Rhodospirillales	AEGEAN-169 marine group	Unassigned	Unassigned
299b5fd0dd492bd230b22e16f08132e0	0	0	0	0	0	0.0120482	0	0	0	0	Bacteria	Proteobacteria	Alphaproteobacteria	SAR11 clade	Clade IV	uncultured bacterium	uncultured bacterium
29a6e274948b55c399c8ec16343b9223	0	0	0	0	0	0.0120482	0	0	0	0	Bacteria	Proteobacteria	Gammaproteobacteria	Unassigned	Unassigned	Unassigned	Unassigned
2a1b7378f4ffef4889e538218a16bb0e	0	0	0	0	0	0.0783133	0	0.307229	0	0	Bacteria	Bacteroidetes	Bacteroidia	Flavobacteriales	Flavobacteriaceae	NS5 marine group	Unassigned
2a61897e18dc49302b5b3ce6f4f1995d	0	0	0	0	0	0.0180723	0	0	0	0	Bacteria	Bacteroidetes	Bacteroidia	Flavobacteriales	Flavobacteriaceae	NS2b marine group	Unassigned
2a7f6692290be9b60b0a7767d2453ff6	0	0	0	0.271084	0	0	0	0	0	0	Bacteria	Proteobacteria	Gammaproteobacteria	Vibrionales	Vibrionaceae	Vibrio	Unassigned
2abd251ccc13556a109cc95fc7fc4e09	0	0	0	0	0	0	0	0	0	0.0060241	Bacteria	Proteobacteria	Alphaproteobacteria	Rhodospirillales	Terasakiellaceae	uncultured	uncultured alpha proteobacterium
2ac4c57d389d492436f8e780414bd11b	0	0	0	0	0	0	0	0.0301205	0	0	Bacteria	Proteobacteria	Gammaproteobacteria	Aeromonadales	Aeromonadaceae	Oceanisphaera	Unassigned
2af1f30a2b59f975c883e3709363bb85	0	0	0.108434	0	0	0	0	0	0	0	Bacteria	Proteobacteria	Gammaproteobacteria	Vibrionales	Vibrionaceae	Vibrio	Unassigned
2b04f3490b41b256d354b07db6b3bdfd	0	0	0	0	0	0	0.0481928	0	0	0	Bacteria	Proteobacteria	Alphaproteobacteria	Sphingomonadales	Sphingomonadaceae	Sphingomonas	Unassigned
2b4ea1807fb215cd25e94c6e4c6fd594	0.331325	0.253012	0.10241	1.1747	1.43976	0	0.313253	0.240964	0.518072	0.0481928	Bacteria	Actinobacteria	Actinobacteria	Propionibacteriales	Propionibacteriaceae	Cutibacterium	uncultured bacterium
2b5cd0e742c990815df9197f00488616	0.156627	0.0361446	2.22289	0	0	0	0	0	0	0	Bacteria	Proteobacteria	Deltaproteobacteria	SAR324 clade(Marine group B)	Unassigned	Unassigned	Unassigned
2b86cd92c4fe5e23818fa6490d678747	0	0	0	0.0180723	0	0	0	0	0	0	Bacteria	Actinobacteria	Coriobacteriia	Coriobacteriales	Atopobiaceae	Atopobium	Unassigned
2b8b2eec372048adc073978f7032d13b	0	0	0	0	0	0	0	0	0.0783133	0	Bacteria	Patescibacteria	Gracilibacteria	Candidatus Peribacteria	Unassigned	Unassigned	Unassigned
2bc22e4dff7d8ce5e5ff06f6f628c037	0	0	0	0	0	0	0	0	0.0542169	0	Bacteria	Proteobacteria	Gammaproteobacteria	Oceanospirillales	Marinomonadaceae	Marinomonas	Unassigned
2be937e838ff59bb0e02dd2cfc2835c7	0	0.0180723	0	0	0	0	0	0	0	0	Archaea	Nanoarchaeaeota	Woesearchaeia	marine metagenome	marine metagenome	marine metagenome	marine metagenome
2c06597c28ad3f821016762b3f70d1f9	0	0	0	0	0	0	0	0.174699	0	0	Bacteria	Proteobacteria	Alphaproteobacteria	SAR11 clade	Clade I	Clade Ia	uncultured bacterium
2c65a287c04719f5fde95d1905322768	0	0	0	0	0	0.0120482	0	0	0	0	Bacteria	Bacteroidetes	Bacteroidia	Chitinophagales	Saprospiraceae	uncultured	uncultured bacterium
2c7d7c2aabdfcae5dcab268b68cc639a	1.8012	0	0	0	0	0	0	0	0	0	Bacteria	Firmicutes	Bacilli	Lactobacillales	Enterococcaceae	Enterococcus	Unassigned
2c8d59367e14b5cd4a15fc136861cc59	0	0	0	0	0.120482	0	0	0	0	0	Bacteria	Proteobacteria	Gammaproteobacteria	Pseudomonadales	Pseudomonadaceae	Pseudomonas	Unassigned
2c990096666db7bb689e02f6d3938b32	0	0	0	0	0	0.0903614	0	0	0	0	Bacteria	Proteobacteria	Alphaproteobacteria	Rhodobacterales	Rhodobacteraceae	HIMB11	Unassigned
2cce349cf9963eefa9107b51d20719a0	0	0	0	0.331325	0.0783133	0	0.216867	0	0.192771	0	Bacteria	Firmicutes	Bacilli	Lactobacillales	Streptococcaceae	Streptococcus	uncultured bacterium
2d42c5044e6febf53d785c0576ead839	0.259036	0.144578	0	0.277108	0.204819	0.957831	0.415663	0.403614	0	1.56024	Bacteria	Proteobacteria	Alphaproteobacteria	SAR11 clade	Clade III	Unassigned	Unassigned
2dd6ae896b6ccb6258e6dbf355fc0022	0	0	0	0	0	0.0481928	0	0	0	0	Bacteria	Proteobacteria	Alphaproteobacteria	Rhodospirillales	uncultured	Unassigned	Unassigned
2e0bcc3a3ea7aa463758a1f45addd1b7	0	0	0	0	0.560241	0	0.445783	2.30723	0.590361	0	Bacteria	Bacteroidetes	Bacteroidia	Cytophagales	Cyclobacteriaceae	Fulvivirga	Unassigned
2e0d6c64525127b1f285b91f2e7ff3b6	0	0	0	0	0	0	0.0481928	0	0	0	Bacteria	Proteobacteria	Gammaproteobacteria	Oceanospirillales	Endozoicomonadaceae	Endozoicomonas	Unassigned
2e5a5888a7be027852e5f6b7f54364b8	0	0	0	0	0	0	0	0	0	0.0361446	Bacteria	Proteobacteria	Gammaproteobacteria	SAR86 clade	Unassigned	Unassigned	Unassigned
2ed7c15a128163571091ab0ed8a49eea	0.162651	0	0	0	0	0.76506	0	0.271084	0	1.50602	Bacteria	Bacteroidetes	Bacteroidia	Flavobacteriales	Cryomorphaceae	uncultured	uncultured bacterium
2eff8e0aa8a8eb32ff554a6b8a85ac8d	0	0	0	0	0	0.0361446	0	0	0	0	Bacteria	Marinimicrobia (SAR406 clade)	Unassigned	Unassigned	Unassigned	Unassigned	Unassigned
2f16ac4c95527009613d2e1cb7f51927	1.98193	0.584337	3.60843	0	0	0	0	0	0	0	Bacteria	Firmicutes	Clostridia	Clostridiales	Peptostreptococcaceae	Tepidibacter	Unassigned
2f280719aebac50441a0f1d3cb1450c1	0.578313	0.10241	0	0.301205	0.150602	1.10843	0	0.753012	0.409639	2.12048	Bacteria	Bacteroidetes	Bacteroidia	Flavobacteriales	Cryomorphaceae	uncultured	uncultured bacterium
2fe2901dc8cc4495f0e7edcc1e53d9a1	0	0	0	0	0	0.108434	0.0180723	0	0	0	Bacteria	Proteobacteria	Deltaproteobacteria	Bdellovibrionales	Bdellovibrionaceae	OM27 clade	uncultured bacterium
30e8af00c4488b430488bd35a1a79442	0	0	0	0	0	0.10241	0	0	0	0	Bacteria	Bacteroidetes	Bacteroidia	Flavobacteriales	Crocinitomicaceae	Fluviicola	Unassigned
31547201b01b9bc90add364d247c3dc7	0	0	0	0.216867	0.240964	0.319277	0	0.13253	0	0.819277	Bacteria	Bacteroidetes	Bacteroidia	Flavobacteriales	Flavobacteriaceae	NS5 marine group	Unassigned
31833ebecc93ba12701937524ac18792	6.3012	49.2651	54.1145	0.144578	0.0120482	0	0	0	0	0	Bacteria	Bacteroidetes	Bacteroidia	Bacteroidales	Prolixibacteraceae	Roseimarinus	uncultured Bacteroidetes bacterium
318d0dfb77f22351c031a1acffbe79f3	0	0	0	0	0	0.0120482	0	0	0	0	Bacteria	Cyanobacteria	Oxyphotobacteria	Synechococcales	Cyanobiaceae	Synechococcus CC9902	Unassigned
3268b3fad8a10767d987ff93c0102ee8	0.0722892	0	0.26506	0	0	0	0	0	0	0	Bacteria	Firmicutes	Clostridia	Clostridiales	Clostridiaceae 4	Paramaledivibacter	Unassigned
327493b13c5b6fbc05bf1bbafcfb0d22	0	0	0	0	0	0.0180723	0	0	0	0	Bacteria	Bacteroidetes	Bacteroidia	Flavobacteriales	Flavobacteriaceae	NS5 marine group	uncultured bacterium
32ce6b047a35a18ff6cc3930a386b6d9	0.0240964	0	0	0	0	0	0	0	0	0	Bacteria	Proteobacteria	Deltaproteobacteria	Myxococcales	Sandaracinaceae	uncultured	Unassigned
330881ef1e37b139d888f31f4a5cdeaf	0	0	0	0	0	0.337349	0	0	0	0	Bacteria	Bacteroidetes	Bacteroidia	Flavobacteriales	NS9 marine group	uncultured bacterium	uncultured bacterium
33aeb1cee573194e6938e3000cf9861b	0.0361446	0	0	0	0	0	0	0	0	0	Bacteria	Bacteroidetes	Bacteroidia	Cytophagales	Cyclobacteriaceae	Fulvivirga	Unassigned
3432cad31af98f513e7d73411ae6f644	0	0	0	0	0	0.0240964	0	0	0	0	Bacteria	Proteobacteria	Alphaproteobacteria	Rhodobacterales	Rhodobacteraceae	HIMB11	Unassigned
344b04173ba546727d77a833d9722db1	0.144578	0.0542169	0	0	0	0	0	0.975904	0	0	Bacteria	Spirochaetes	Spirochaetia	Spirochaetales	Spirochaetaceae	Spirochaeta 2	uncultured organism
34ad775f43c2af633b70a4aa55f9ae47	0	0	0	0	0	1.89157	0	0	0	0.680723	Bacteria	Proteobacteria	Alphaproteobacteria	Rhodobacterales	Rhodobacteraceae	HIMB11	Unassigned
34cd48ce0c5ceba698a13a0bea8a7384	0	0	0	0	0.144578	0	0	0	0	0	Bacteria	Proteobacteria	Gammaproteobacteria	Oceanospirillales	Nitrincolaceae	Unassigned	Unassigned
35074d803622584ae80ffb397a26f7df	0	0	0	0	0	0	0.144578	0	0	0	Bacteria	Proteobacteria	Gammaproteobacteria	Betaproteobacteriales	Burkholderiaceae	Comamonas	Unassigned
359eabb14a586d4ebdf816608cf0bf03	0	0.0361446	0	0	0.150602	0	0.0301205	0	0	0.10241	Bacteria	Proteobacteria	Gammaproteobacteria	Betaproteobacteriales	Burkholderiaceae	Massilia	uncultured bacterium
36088ca75f864addc2f6d0de908f8f90	0	0	0	0	0	0	0	0	0	0.0361446	Bacteria	Firmicutes	Bacilli	Bacillales	Staphylococcaceae	Staphylococcus	Unassigned
36636fbf48b0445c813f6e99033cb85c	0	0	0	0	0	0.0120482	0	0	0	0	Bacteria	Actinobacteria	Acidimicrobiia	Actinomarinales	Actinomarinaceae	Candidatus Actinomarina	uncultured bacterium
368384e623fce2220ef57e92f0a549a1	0.108434	0.144578	0	0	0	0.307229	0	0	0	0.307229	Bacteria	Proteobacteria	Alphaproteobacteria	Puniceispirillales	SAR116 clade	Unassigned	Unassigned
36a7af9ab84a77bf77a3aef44fad183a	0	0	0	0	0	0	0.536145	0	0	0	Bacteria	Proteobacteria	Gammaproteobacteria	Vibrionales	Vibrionaceae	Vibrio	Unassigned
372827bba97fec4710a9ca8b5ef7dd28	0	0	0	0	0	0	0	0	0.0542169	0	Bacteria	Actinobacteria	Actinobacteria	Corynebacteriales	Corynebacteriaceae	Turicella	uncultured bacterium
37783c588c847ba52cf546c89192c3e9	0	0	0	0.10241	0	0	0	0	0	0.349398	Bacteria	Proteobacteria	Gammaproteobacteria	Pseudomonadales	Pseudomonadaceae	Pseudomonas	Unassigned
378bda9e1916e0fd882e0bea4595b42d	0	0	0	0	0	0.0180723	0	0	0	0	Bacteria	Bacteroidetes	Bacteroidia	Flavobacteriales	Flavobacteriaceae	Formosa	Unassigned
37d5dfe5282c3ebf3610fcefb2f8ffa0	0.0542169	0	0	0	0	0.614458	0	0.0963855	0	0.5	Bacteria	Proteobacteria	Gammaproteobacteria	SAR86 clade	Unassigned	Unassigned	Unassigned
37fb32c76a457ff18bc2578493170fce	0	0	0	0	0	0.0120482	0	0	0	0	Bacteria	Proteobacteria	Gammaproteobacteria	Cellvibrionales	Cellvibrionaceae	Unassigned	Unassigned
3894989d771976c51cf41faaaaa91173	0	0	0	0	0	0.150602	0	0	0	0.0361446	Bacteria	Bacteroidetes	Bacteroidia	Flavobacteriales	NS9 marine group	uncultured bacterium	uncultured bacterium
38cf58864b3b1a1a86574d97943127bb	0	0	0	0	0	0.0120482	0	0	0	0	Bacteria	Proteobacteria	Alphaproteobacteria	Unassigned	Unassigned	Unassigned	Unassigned
39360c41cd40f4228fd55209e3dd49ac	0	0	0	0	0	0.301205	0.246988	0.138554	0	0	Bacteria	Proteobacteria	Gammaproteobacteria	Vibrionales	Vibrionaceae	Vibrio	Unassigned
393f00a5589b693e9bbf49f36139ffd2	0	0	0	0	0	0	0	0	0.060241	0	Bacteria	Bacteroidetes	Bacteroidia	Chitinophagales	Saprospiraceae	Unassigned	Unassigned
3945f7f40a71eeb3eabd3eaf7f842cf6	0	0.144578	0	0	0	0	0	0	0	0	Bacteria	Bacteroidetes	Bacteroidia	Flavobacteriales	Flavobacteriaceae	NS5 marine group	Unassigned
399b5df08c7ef6072a43cf3ec45584fe	0.0301205	0	0	0	0	0	0	0	0	0	Bacteria	Patescibacteria	Saccharimonadia	Saccharimonadales	uncultured bacterium	uncultured bacterium	uncultured bacterium
3a9e87a0851b6edd99586e2674df009e	0	0	0	0	0	0.0240964	0	0	0	0	Bacteria	Proteobacteria	Alphaproteobacteria	SAR11 clade	Clade III	Unassigned	Unassigned
3afcfe58aa47f1c346894a5cabc3bd74	0	0	0	0	0	0	0	0	0.108434	0	Bacteria	Proteobacteria	Alphaproteobacteria	uncultured	uncultured bacterium	uncultured bacterium	uncultured bacterium
3bd7fdd0daf1aa0f1779bc3117dade7c	0	0	0.0120482	0	0	0	0	0	0	0	Bacteria	Bacteroidetes	Bacteroidia	Bacteroidales	Marinilabiliaceae	Carboxylicivirga	Unassigned
3bf452254e3256305ccad28b4b61142b	0	0.0361446	0	0	0	0	0	0	0	0	Bacteria	Proteobacteria	Gammaproteobacteria	Steroidobacterales	Woeseiaceae	Woeseia	Unassigned
3c774a0ff48427799fd09786f243a4fb	0.144578	0	0	0.162651	0.0361446	0.957831	0.0903614	0	0.10241	0.704819	Bacteria	Bacteroidetes	Bacteroidia	Flavobacteriales	Flavobacteriaceae	NS4 marine group	Unassigned
3cae951cc305975d130ab759c71c2500	0.0180723	0	0	0	0	0	0	0	0	0	Bacteria	Spirochaetes	Spirochaetia	Spirochaetales	Spirochaetaceae	Spirochaeta 2	uncultured organism
3cb7ca9ce2391703cfe9900eeb0e84b8	0	0	0	0	0	0	0	0.126506	0	0	Bacteria	Proteobacteria	Gammaproteobacteria	Oceanospirillales	Endozoicomonadaceae	Endozoicomonas	uncultured bacterium
3cbcfd8b7189d01afc4941008f9d944c	0	0	0	0	0	0	0	0	0	0.0361446	Bacteria	Proteobacteria	Alphaproteobacteria	Sphingomonadales	Sphingomonadaceae	Sphingomonas	Unassigned
3d049dae742519704ea4572487782494	1.48193	0	0	0	0	0	0	0	0	0	Bacteria	Bacteroidetes	Bacteroidia	Bacteroidales	Dysgonomonadaceae	Proteiniphilum	uncultured bacterium
3d307706a30dbed576afcca3c0f3eff2	0	0	0	0	0	0	0	0	0.0120482	0	Archaea	Nanoarchaeaeota	Woesearchaeia	uncultured euryarchaeote	uncultured euryarchaeote	uncultured euryarchaeote	uncultured euryarchaeote
3d3b6d52b0c51d8ae60aa5d4a971af83	0	0	0	0	0	0.120482	0	0	0	0	Bacteria	Proteobacteria	Gammaproteobacteria	SAR86 clade	uncultured bacterium	uncultured bacterium	uncultured bacterium
3d579399630a185b80c998d958eee3a6	0.0240964	0	0	0	0	0	0	0	0	0	Bacteria	Firmicutes	Clostridia	Clostridiales	Syntrophomonadaceae	uncultured	uncultured bacterium
3d8da47804acfc3d8ed51154e2b50c63	0	0	0	0	0	0	0	0	0	0.0120482	Bacteria	Bacteroidetes	Bacteroidia	Flavobacteriales	Flavobacteriaceae	NS5 marine group	Unassigned
3d9db5b3b063178562b420afc89fc4db	0	0	0	0	0	0.0843373	0	0	0	0	Bacteria	Proteobacteria	Alphaproteobacteria	SAR11 clade	Clade I	Clade Ia	uncultured bacterium
3e361939b786fc2fa64f41f6b2fea00a	0	0	0	0	0	0.0662651	0	0	0	0	Bacteria	Proteobacteria	Alphaproteobacteria	Puniceispirillales	SAR116 clade	Unassigned	Unassigned
3e83753dd905c5614de02a432a7b27bd	0	0	0.5	0	0	0	0	0	0	0	Bacteria	Patescibacteria	Parcubacteria	Candidatus Yanofskybacteria	uncultured bacterium	uncultured bacterium	uncultured bacterium
3ec7f95fd4f192e223e27a042c1cb1fa	0	0	0	0	0	0	0.0542169	0	0	0	Bacteria	Proteobacteria	Gammaproteobacteria	Vibrionales	Vibrionaceae	Vibrio	Unassigned
3ff86bb9f2b1d9a41fdf7f35901e54bc	0	0	0	0	0	0	0	0	0	0.0240964	Bacteria	Proteobacteria	Alphaproteobacteria	Micavibrionales	Micavibrionaceae	uncultured	Unassigned
4024086397b6af8927e081e3317bdd3c	0	0	0	0.162651	0	0.26506	0	0	0	0.301205	Bacteria	Bacteroidetes	Bacteroidia	Flavobacteriales	Cryomorphaceae	uncultured	Unassigned
402c20258e34cdb9168fda6ae9456b4b	0	0.0240964	0	0	0	0	0	0	0	0	Bacteria	Cyanobacteria	Oxyphotobacteria	Phormidesmiales	Nodosilineaceae	Unassigned	Unassigned
4048dace5470afe7d16ebdc1c2b47c94	0	0	0	0	0	0.0301205	0	0	0	0	Bacteria	Bacteroidetes	Bacteroidia	Sphingobacteriales	NS11-12 marine group	Unassigned	Unassigned
404911708412c1fb939b1a1843b79e23	0	0	0	0	0	0	0	0.0722892	0	0	Bacteria	Planctomycetes	Planctomycetacia	Pirellulales	Pirellulaceae	Blastopirellula	uncultured bacterium
406e2d903fb0239681771f6582f074e6	0	0	0	0	0	0.0180723	0	0	0	0	Bacteria	Proteobacteria	Unassigned	Unassigned	Unassigned	Unassigned	Unassigned
407032679eb5e7064b86df399cfb0fbd	0	0	0	0	0	0.0120482	0	0	0	0	Bacteria	Proteobacteria	Alphaproteobacteria	Rhodobacterales	Rhodobacteraceae	HIMB11	Unassigned
40846cf02183774c41084a83824ef2b9	0	0	0	0	0	0.0180723	0	0	0	0	Bacteria	Proteobacteria	Gammaproteobacteria	Oceanospirillales	Litoricolaceae	Litoricola	uncultured bacterium
40a27c24e54aaf975affdfe0d0b23220	0	0	0	0	0	0	0	0.0783133	0	0	Bacteria	Actinobacteria	Actinobacteria	Micrococcales	Brevibacteriaceae	Brevibacterium	uncultured bacterium
40c1537cd274a1bcad76b2c064a8d9e1	0	0	0	0	0	0.0120482	0	0	0	0	Bacteria	Proteobacteria	Alphaproteobacteria	SAR11 clade	Clade I	Clade Ia	uncultured bacterium
40d0055c934a5c2f9435056fd0885bcc	0	0	0	0	0	0.325301	0.126506	0	0.0963855	0.361446	Bacteria	Bacteroidetes	Bacteroidia	Flavobacteriales	NS9 marine group	uncultured bacterium	uncultured bacterium
40e84b9fe928f74a1f555e605d8a498c	3.28313	0	0	0	0	0	0	0	0	0	Bacteria	Firmicutes	Bacilli	Lactobacillales	Enterococcaceae	Enterococcus	Unassigned
40fb0a8e12fbe52d9ee3bc68afe8bda8	0	0	0.0722892	0	0	0	0	0	0	0	Bacteria	Proteobacteria	Deltaproteobacteria	Desulfobacterales	Desulfobacteraceae	Desulfofrigus	Unassigned
4143cdcc51c10abdeaeb1ec80e01caee	0	0	0	0.0301205	0	0	0	0	0	0	Bacteria	Firmicutes	Bacilli	Lactobacillales	Streptococcaceae	Streptococcus	uncultured bacterium
41624d09c1b605e9b2dc701d91833411	0	0	0	0	0	0	0	0	0	0.0240964	Bacteria	Cyanobacteria	Oxyphotobacteria	Phormidesmiales	Phormidesmiaceae	Acrophormium PCC-7375	Unassigned
4186e23e66a0ce9aba75d76cdad9271c	0	0	0	0	0	0	0	0	0	0.0180723	Bacteria	Proteobacteria	Deltaproteobacteria	Oligoflexales	Oligoflexaceae	uncultured	Unassigned
41a221562f7d53fb22cd97b1d68c5400	0.753012	0.355422	0	0	0	0	0	0	0	0	Bacteria	Proteobacteria	Gammaproteobacteria	Vibrionales	Vibrionaceae	Vibrio	Unassigned
41debc4ac00fb9fa395b7f87327f40cd	0	0	0	0	0	0.0180723	0	0	0	0	Bacteria	Bacteroidetes	Bacteroidia	Flavobacteriales	Flavobacteriaceae	NS5 marine group	uncultured Flavobacteriaceae bacterium
42233b938a98e4251183d1865df37fa3	0	0	0	0	0	0.0120482	0	0	0	0	Bacteria	Bacteroidetes	Bacteroidia	Flavobacteriales	Flavobacteriaceae	Unassigned	Unassigned
422565147e53803e1628962a24f93c3f	0	0	0	0	0	0.0963855	0.126506	0	0	0.439759	Bacteria	Proteobacteria	Alphaproteobacteria	Unassigned	Unassigned	Unassigned	Unassigned
424f277dd20fd2995289489ccdd54712	0	0	0	0	0	0.0843373	0	0	0	0	Bacteria	Proteobacteria	Gammaproteobacteria	Oceanospirillales	Litoricolaceae	Litoricola	Unassigned
42b917e681a76983b41f4aff29d41477	0	0	0	0	0	0	0	0	0	0.0240964	Bacteria	Actinobacteria	Acidimicrobiia	Microtrichales	Microtrichaceae	uncultured	uncultured bacterium
42cc0dba1ca891cc3da77df9e5fc0f68	0	0	0	0	0.144578	0	0	0	0	0	Bacteria	Proteobacteria	Alphaproteobacteria	Puniceispirillales	SAR116 clade	Unassigned	Unassigned
4391db4e7baf0d3c97db873238d2da1b	0	0.0542169	0.0180723	14.9157	0.186747	0	4.95181	1.29518	0.39759	0	Bacteria	Bacteroidetes	Bacteroidia	Flavobacteriales	Flavobacteriaceae	Maritimimonas	Unassigned
43930551aa65512330668488728f200d	0	0	0	0	0	0	0.180723	0	0	0	Bacteria	Proteobacteria	Deltaproteobacteria	Desulfobacterales	Desulfobacteraceae	uncultured	Unassigned
43aa86f98a6134976bc89f1f25c38023	0	0	0	0	0	0.560241	0	0	0	0.307229	Bacteria	Cyanobacteria	Oxyphotobacteria	Synechococcales	Cyanobiaceae	Synechococcus CC9902	Unassigned
43b5ddeff41800aa0231c90e789b71b3	0.0783133	0	0	0.0963855	0	0.349398	0.5	0	0	0.626506	Bacteria	Bacteroidetes	Bacteroidia	Flavobacteriales	Flavobacteriaceae	NS5 marine group	Unassigned
43b90d451a0c208d5aef6c81ce96b107	0	0	0	0	0	0.0120482	0	0	0	0	Bacteria	Bacteroidetes	Bacteroidia	Flavobacteriales	Flavobacteriaceae	Wenyingzhuangia	Unassigned
43d112b825f90607bf0d856a55884441	0	0	0	0	0	0	0	0	0	0.108434	Bacteria	Bacteroidetes	Bacteroidia	Flavobacteriales	Flavobacteriaceae	NS4 marine group	Unassigned
4415de17cd04c37ac49ff357d9b58ab8	0	0	0	0	0	0	0.0963855	0	0	0	Bacteria	Proteobacteria	Gammaproteobacteria	KI89A clade	uncultured bacterium	uncultured bacterium	uncultured bacterium
444ed38f6f13891f2a0750641f2c6b9b	0	0	0.0240964	0	0	0	0	0	0	0	Bacteria	Proteobacteria	Gammaproteobacteria	Pasteurellales	Pasteurellaceae	Haemophilus	uncultured bacterium
445766f0ae088597f5427396ee961186	0.0361446	0	0	0	0	0	0	0	0	0	Bacteria	Lentisphaerae	Oligosphaeria	P.palmC41	Unassigned	Unassigned	Unassigned
4489ef67896758f1f16a8c0a7d9c156b	0	0	0	0	0	0	0	0	0	0.0120482	Bacteria	Bacteroidetes	Bacteroidia	Chitinophagales	Saprospiraceae	uncultured	Unassigned
44d4325528338a16d42b6f6176bc4b72	0.10241	0	0	0	0.481928	0	0	0	0	0	Bacteria	Proteobacteria	Gammaproteobacteria	Xanthomonadales	Xanthomonadaceae	Stenotrophomonas	Unassigned
44e40afccd669b6fce07bbf1eb1e3db0	0	0	0	0	0	0.0060241	0	0	0	0	Bacteria	Bacteroidetes	Bacteroidia	Flavobacteriales	NS9 marine group	Unassigned	Unassigned
4511d6f4fc9710aca1b9b1061be01ed6	0	0	0	0	0	0	0.0662651	0	0	0	Bacteria	Bacteroidetes	Bacteroidia	Flavobacteriales	Cryomorphaceae	uncultured	Unassigned
4519d0d1d4a257b61cb62a32910fb364	0.0301205	0	0	0	0	0	0	0	0	0	Bacteria	Patescibacteria	Unassigned	Unassigned	Unassigned	Unassigned	Unassigned
453d326f7b5ad5c6a59f05350a3f7f73	0.379518	0	0	0.391566	0	0	0.0542169	0	0	0	Bacteria	Firmicutes	Bacilli	Bacillales	Bacillaceae	Anoxybacillus	Unassigned
45426c478aab4702ac05b777d3d3e905	0	0	0	0.138554	0	0	0	0	0	0	Bacteria	Bacteroidetes	Bacteroidia	Flavobacteriales	Flavobacteriaceae	Flavobacterium	Unassigned
45ab25c51b2a0e5f71a87f3812330651	0	0	0	0	0	0	0	0	0	0.0120482	Bacteria	Proteobacteria	Gammaproteobacteria	Oceanospirillales	Saccharospirillaceae	Oleispira	uncultured bacterium
45abe1d252ee302478a2669e8ebf5081	0	0	0	0.0421687	0	0	0	0	0	0	Bacteria	Firmicutes	Bacilli	Bacillales	Staphylococcaceae	Salinicoccus	Salinicoccus roseus
45bdc7c409ac0d0def44348c3b8da113	0.0662651	0	0	0	0	0	0	0	0	0	Bacteria	Acidobacteria	Blastocatellia (Subgroup 4)	Blastocatellales	Blastocatellaceae	uncultured	uncultured bacterium
4609b8cd78af87fe945149d2764ad076	0	0	0.138554	0	0	0	0	0	0	0	Bacteria	Proteobacteria	Deltaproteobacteria	Desulfobacterales	Desulfobulbaceae	Desulfopila	uncultured bacterium
469a96340494fdd7edb85f4a9dc10e08	0	0	0	0	0	0	0	0	0	0.0662651	Bacteria	Bacteroidetes	Bacteroidia	Cytophagales	Amoebophilaceae	uncultured	uncultured bacterium
46a2d24216e755b8bc0a347ccb31a3fa	0	0	0	0	0	0	0	0.0421687	0	0	Bacteria	Actinobacteria	Actinobacteria	Corynebacteriales	Corynebacteriaceae	Corynebacterium 1	uncultured bacterium
46e3c902444a9dd6b5aa1b3da9ac3e33	0	0	0	0	0.126506	0	0	0	0	0	Bacteria	Marinimicrobia (SAR406 clade)	uncultured bacterium	uncultured bacterium	uncultured bacterium	uncultured bacterium	uncultured bacterium
471d725bfdea10455839a1315d0dc43a	0.210843	0	0.0421687	0.301205	0.060241	1.4759	0.168675	0.162651	0.13253	1.43373	Bacteria	Proteobacteria	Gammaproteobacteria	Cellvibrionales	Halieaceae	OM60(NOR5) clade	Unassigned
472888d9a5f647b48b3bb0d8ad03c3c0	0	0	0	0	0	0.0180723	0	0	0	0	Bacteria	Bacteroidetes	Bacteroidia	Flavobacteriales	Flavobacteriaceae	NS5 marine group	Unassigned
4730c071004f237b45757d81530487c1	8.6988	0	0	0	0	0	0	0	0	0	Bacteria	Bacteroidetes	Bacteroidia	Bacteroidales	Unassigned	Unassigned	Unassigned
477d11de6d8fc15723eca8ff8e591629	0	0	0	0	0	0.0120482	0	0	0	0	Bacteria	Bacteroidetes	Bacteroidia	Flavobacteriales	NS9 marine group	uncultured bacterium	uncultured bacterium
478a30819554af06d4a360b05d6da38f	0	0	0	0	0.150602	0	0	0	0	0	Bacteria	Fusobacteria	Fusobacteriia	Fusobacteriales	Fusobacteriaceae	Fusobacterium	uncultured organism
478ff5073c53c40084a8ae9cf0c1a5ac	0	0	0	0	0	0	0.0963855	0	0	0	Bacteria	Proteobacteria	Gammaproteobacteria	Vibrionales	Vibrionaceae	Vibrio	Unassigned
47ea579027854b4b549e7e071490ed58	0	0	0	0	0	0	0	0.192771	0	0	Bacteria	Proteobacteria	Gammaproteobacteria	Pseudomonadales	Moraxellaceae	Acinetobacter	Unassigned
47f3dacbe758c07a36003337dab3d9ae	0	0	0	0	0	0	0	0	0	0.0180723	Bacteria	Proteobacteria	Gammaproteobacteria	Enterobacteriales	Enterobacteriaceae	Enterobacter	Unassigned
482cb3882314b4f3906d11c1c867e25e	0	0	0	0	0	0	0	0	0	0.0301205	Bacteria	Proteobacteria	Deltaproteobacteria	PB19	Unassigned	Unassigned	Unassigned
488cc769c093d1be71296e796e6252ee	0.0783133	0	0	0	0	0	0	0	0	0	Bacteria	Bacteroidetes	Bacteroidia	Flavobacteriales	Weeksellaceae	Moheibacter	uncultured bacterium
48961b8e2380baba31be02d31b1df7d4	0.0662651	0	0	0	0	0	0	0	0	0	Bacteria	Firmicutes	Clostridia	Clostridiales	Ruminococcaceae	Saccharofermentans	uncultured bacterium
4918be5d3fa0b5bede4e2ab7e0cd4146	0	0.0301205	0	0	0	0	0	0	0	0	Bacteria	Proteobacteria	Deltaproteobacteria	Desulfobacterales	Desulfobulbaceae	Desulfobulbus	Unassigned
492297ee6cb119e07dc951035046a464	0	0	0	0	0	0	0	0	0.0180723	0	Bacteria	Proteobacteria	Gammaproteobacteria	Pseudomonadales	Moraxellaceae	Enhydrobacter	Unassigned
495b39970ff62321ccd68fd8b6f35d74	0	0	0	0.108434	0	0	0	0	0	0	Bacteria	Firmicutes	Bacilli	Bacillales	Bacillaceae	Anoxybacillus	uncultured bacterium
498d7551e066fc0bca55b1194a0356ba	0.518072	0.439759	0	0	0	0	0	0	0	0	Bacteria	Proteobacteria	Gammaproteobacteria	Vibrionales	Vibrionaceae	Vibrio	Unassigned
499b275055720ebd9db432f70fdcd3d7	0	0	0	0	0.240964	0	0	0	0	0	Bacteria	Proteobacteria	Gammaproteobacteria	Vibrionales	Vibrionaceae	Vibrio	Unassigned
4a4bc0f6e3189b2c1efe501e905f880a	0	0	0	0.0903614	0	0	0	0	0	0	Bacteria	Proteobacteria	Gammaproteobacteria	Oceanospirillales	Nitrincolaceae	Unassigned	Unassigned
4af692500d83f6a7242166dbd56021bd	0.0180723	0	0	0	0	0	0	0	0	0	Bacteria	Chloroflexi	Anaerolineae	Ardenticatenales	uncultured	uncultured bacterium	uncultured bacterium
4af76f7236cce6f17c5845abc4fdd549	0.0481928	0	0	0	0	0	0	0	0	0	Bacteria	Proteobacteria	Alphaproteobacteria	Rhizobiales	Methyloligellaceae	uncultured	uncultured bacterium
4b11bdd65e04e4eeed4d7dfa9bf3ea3f	1.51807	0	0	0	0	0	0	0	0	0	Bacteria	Firmicutes	Bacilli	Lactobacillales	Enterococcaceae	Enterococcus	Unassigned
4b2fa860af7aa3b3d6cf28520aa40b4a	0	0	0	0	0	0.0180723	0	0	0	0	Bacteria	Proteobacteria	Gammaproteobacteria	Thiotrichales	Thiotrichaceae	uncultured	Unassigned
4b3cf5be287bcfc1880d06236b6770a5	0	0	0	0.0361446	0	0	0	0	0	0	Bacteria	Proteobacteria	Gammaproteobacteria	Oceanospirillales	Unassigned	Unassigned	Unassigned
4b3daf315ec124dc1da85172d1950132	0	0	0	0	0	0.0240964	0	0	0	0	Bacteria	Bacteroidetes	Bacteroidia	Flavobacteriales	Flavobacteriaceae	NS4 marine group	Unassigned
4b49b7ba4cb9906c1810da70afa77ca3	0.0843373	0	0	0	0	0	0	0	0	0	Bacteria	Firmicutes	Clostridia	Clostridiales	Family XI	Anaerococcus	uncultured bacterium
4b70550953163427b06730de492a8380	0	0	0	0	0	0	0	0	0	0.0060241	Bacteria	Proteobacteria	Deltaproteobacteria	Unassigned	Unassigned	Unassigned	Unassigned
4bba67d79a381c4a596c00959f91dedb	0.283133	0.0240964	0.0662651	0.433735	0.337349	3.96988	0.26506	0.457831	0.168675	2.18072	Bacteria	Cyanobacteria	Oxyphotobacteria	Synechococcales	Cyanobiaceae	Synechococcus CC9902	Unassigned
4beeda3b76e9448b58cd75a161763c28	0	0.150602	0	0	0	0	0	0	0	0	Bacteria	Proteobacteria	Gammaproteobacteria	Oceanospirillales	Saccharospirillaceae	Oleibacter	uncultured bacterium
4bf261c937264ae062718e9d0019e393	0	0	0	0	0	0.0180723	0	0	0	0	Bacteria	Proteobacteria	Alphaproteobacteria	Rhodospirillales	Magnetospiraceae	uncultured	uncultured bacterium
4c2ba236ddd3745a09909069e88d490d	0.0421687	0	0	0	0	0	0	0	0	0	Bacteria	Proteobacteria	Deltaproteobacteria	Desulfobacterales	Desulfobacteraceae	Unassigned	Unassigned
4c44c8c00d8b1c5ac139c01e319c73a9	0	0	0	0.192771	0	0	0	0	0	0	Bacteria	Proteobacteria	Alphaproteobacteria	SAR11 clade	Clade II	uncultured bacterium	uncultured bacterium
4cc3ffae72fbacfd5f3aac6808322c64	0.120482	0.0361446	0	0	0.36747	0	0	0	0	0	Bacteria	Proteobacteria	Alphaproteobacteria	Rhodovibrionales	Kiloniellaceae	Tistlia	Unassigned
4d86f569f0d971a7852a1489f928905f	0	0	0	0	0	0	0.13253	0	0	0	Bacteria	Spirochaetes	Spirochaetia	Spirochaetales	Spirochaetaceae	Spirochaeta 2	Unassigned
4da17d2a6d9e3b342a20c2545750acac	0.0722892	0	0	0	0	0	0	0	0	0	Bacteria	Actinobacteria	Actinobacteria	Propionibacteriales	Propionibacteriaceae	uncultured	uncultured bacterium
4e0f1b4534b10ae235da16d1a5e45750	0	0	0	0.0722892	0	0	0	0	0	0	Bacteria	Proteobacteria	Alphaproteobacteria	Rhodobacterales	Rhodobacteraceae	uncultured	Unassigned
4e24afa1d96ce817d19baf44a756d7ae	0	0.0120482	0	0	0	0	0	0	0	0	Bacteria	Firmicutes	Clostridia	Clostridiales	Clostridiaceae 1	Unassigned	Unassigned
4e3c1c427b4137262e8cced385959e51	2.13855	0	0	0	0	0	0	0	0	0	Bacteria	Firmicutes	Bacilli	Lactobacillales	Enterococcaceae	Enterococcus	Unassigned
4e518efbd67789bcdc67b1042a7375f0	0	0	0	0	0	0	0	0	0.0240964	0	Bacteria	Proteobacteria	Gammaproteobacteria	Alteromonadales	Unassigned	Unassigned	Unassigned
4e52070c5563074c0b9e82a85c72fa71	0	0	0	0	0	0	0	0	0	0.0240964	Bacteria	Bacteroidetes	Bacteroidia	Flavobacteriales	Flavobacteriaceae	Unassigned	Unassigned
4ecf49020bf4b89716ab12c9089ad942	0	0	0	0	0	0	0	0.120482	0	0	Bacteria	Lentisphaerae	Unassigned	Unassigned	Unassigned	Unassigned	Unassigned
4f3901c5df05fa499c08c9901ef1af93	0	0	0	0	0	0	0.0542169	0	0	0	Bacteria	Proteobacteria	Alphaproteobacteria	Rhizobiales	Rhizobiaceae	Allorhizobium-Neorhizobium-Pararhizobium-Rhizobium	Unassigned
4f62a06a1735243d3dc11fc1b9a78dda	0	0	0	0	0	0.0361446	0	0	0	0	Bacteria	Proteobacteria	Deltaproteobacteria	Oligoflexales	Oligoflexaceae	uncultured	uncultured bacterium
4f663bfbf8b47da5d77e2f06ccdc3438	0	0	0	0	0	0.0120482	0	0	0	0	Bacteria	Bacteroidetes	Bacteroidia	Unassigned	Unassigned	Unassigned	Unassigned
4f6cfaa3cd179036342bcf1c8425207a	0.0421687	0	0	0	0	0	0	0	0	0	Bacteria	Margulisbacteria	uncultured bacterium	uncultured bacterium	uncultured bacterium	uncultured bacterium	uncultured bacterium
4f8b6693115253a27a67467e29de3208	0	0	0	0	0	0.0060241	0	0	0	0	Bacteria	Bacteroidetes	Bacteroidia	Flavobacteriales	NS9 marine group	uncultured bacterium	uncultured bacterium
4f92f91dd17e02d79c74147f22331d83	0.506024	0	0	0	0	0	0	0	0	0	Bacteria	Proteobacteria	Gammaproteobacteria	Vibrionales	Vibrionaceae	Vibrio	Unassigned
4fcad306b802fa3fb575bd76ff4e9793	0.10241	0	0	0	0	0	0	0	0	0	Bacteria	Actinobacteria	Actinobacteria	Bifidobacteriales	Bifidobacteriaceae	Bifidobacterium	uncultured bacterium
4fd2d12231b0efb619ed0567f737a406	0	0.13253	0	0.240964	0	0.909639	0	0	0	0.740964	Bacteria	Proteobacteria	Alphaproteobacteria	SAR11 clade	Clade III	Unassigned	Unassigned
5167742223b1e6fa87f8d6eb0abdf033	0.337349	0	0	0	0	0	0	0	0	0	Bacteria	Proteobacteria	Gammaproteobacteria	Vibrionales	Vibrionaceae	Vibrio	Unassigned
516943ebeda751528bddc5c9fd481649	0.0662651	0	0	0	0	0	0	0	0	0	Bacteria	Proteobacteria	Alphaproteobacteria	Rhodobacterales	Rhodobacteraceae	Paracoccus	uncultured bacterium
51d0bf30a13c4b19baf66a87259dc37c	0	0	0	0.156627	0	0	0	0	0	0	Bacteria	Proteobacteria	Gammaproteobacteria	Vibrionales	Vibrionaceae	Vibrio	Unassigned
51f096ba96e1b3bf728bf064c4eb3b7a	0	0	0	0	0	0	0	0	0.0240964	0	Archaea	Nanoarchaeaeota	Woesearchaeia	uncultured euryarchaeote	uncultured euryarchaeote	uncultured euryarchaeote	uncultured euryarchaeote
5265fb152f9fcfbcb98977e220268386	0	0	0	0	0	0	0.108434	0	0	0	Archaea	Euryarchaeota	Thermoplasmata	Marine Group II	Unassigned	Unassigned	Unassigned
527680ccff6a9420849a642d6e1229a5	0	0	0	0.13253	0	0	0	0	0	0	Bacteria	Epsilonbacteraeota	Campylobacteria	Campylobacterales	Arcobacteraceae	Arcobacter	uncultured bacterium
528e85dbb195eb0298fb0442d6be70fd	0	0	0	0.0301205	0	0.180723	0	0	0	0.126506	Archaea	Euryarchaeota	Thermoplasmata	Marine Group II	uncultured marine archaeon	uncultured marine archaeon	uncultured marine archaeon
52a283cd839fb7773f565775f924612b	0	0	0	0	0	0	0	0	0	0.349398	Bacteria	Proteobacteria	Alphaproteobacteria	Puniceispirillales	SAR116 clade	Unassigned	Unassigned
52e0d5aecb739ed74d5f4558913b7a15	0	0	0	0	0	0.0120482	0	0	0	0	Bacteria	Bacteroidetes	Bacteroidia	Flavobacteriales	Crocinitomicaceae	Unassigned	Unassigned
52f88ab059b77f7cb33474e63c34da85	0.0722892	0	0	0	0.0301205	0.0903614	0	0	0	0	Bacteria	Proteobacteria	Gammaproteobacteria	Cellvibrionales	Halieaceae	OM60(NOR5) clade	Unassigned
5312eacc50bf42b2338e94eb6b77c38e	0	0	0	0	0	0.0120482	0	0	0	0	Bacteria	Proteobacteria	Alphaproteobacteria	Rhodobacterales	Rhodobacteraceae	HIMB11	Unassigned
5330b30c12103590a18e2c969cb49d5e	0.0180723	0	0	0	0	0	0	0	0	0	Bacteria	Bacteroidetes	Bacteroidia	Chitinophagales	Saprospiraceae	uncultured	uncultured bacterium
5363115063037a3a4832443ef210f484	0	0.174699	0	0	0	0	0	0	0	0	Bacteria	Proteobacteria	Gammaproteobacteria	Alteromonadales	Pseudoalteromonadaceae	Algicola	Unassigned
538f4989bf837fcba8520a6e1285652b	0	0	0	0	0	0	0	0	0.0240964	0	Bacteria	Spirochaetes	Spirochaetia	Spirochaetales	Spirochaetaceae	Unassigned	Unassigned
539f6a08d7fbb588fb3853d8b1df0dcf	0.0361446	0	0	0	0	0	0	0	0	0	Bacteria	Firmicutes	Clostridia	Clostridiales	Christensenellaceae	uncultured	Unassigned
53c35f61d3c08a320a315e5dcd9877e8	0.0421687	0	0	0.0783133	0	0	0	0	0	0	Bacteria	Bacteroidetes	Ignavibacteria	SJA-28	uncultured bacterium	uncultured bacterium	uncultured bacterium
53d728153516e2240e57454331f95f4b	0	0	0	0	0	0	0.192771	0	0	0.0180723	Bacteria	Bacteroidetes	Bacteroidia	Chitinophagales	Saprospiraceae	Aureispira	Unassigned
5404c6e9a02f5944368a34d8f5466f84	0	0	0	0	0	0.0542169	0	0	0	0	Bacteria	Proteobacteria	Alphaproteobacteria	Puniceispirillales	SAR116 clade	Unassigned	Unassigned
54394c6feb81b5a627e4bd1f6cfc33b8	0	0	0	0	0.337349	0.307229	0	0	0	0.325301	Bacteria	Proteobacteria	Alphaproteobacteria	Rhodospirillales	AEGEAN-169 marine group	Unassigned	Unassigned
548348db8faa1db94d1ba895b67ab211	0	0	0	0	0	0.307229	0	0	0	0.349398	Bacteria	Proteobacteria	Gammaproteobacteria	SAR86 clade	uncultured bacterium	uncultured bacterium	uncultured bacterium
548f213c96715c25775a99c11525543a	0.150602	0	0	0	0	0	0	0	0	0	Bacteria	Firmicutes	Bacilli	Lactobacillales	Streptococcaceae	Streptococcus	Unassigned
54bb86c2dfbae10b81e6b8d76cf0cd6e	0	0	0	0	0	0.0120482	0	0	0	0	Bacteria	Proteobacteria	Alphaproteobacteria	SAR11 clade	Clade I	Clade Ia	Unassigned
54cdf6b90bbebe3b7b67918b19d4d440	0.0120482	0	0	0	0	0	0	0	0	0	Bacteria	Proteobacteria	Alphaproteobacteria	Rhodospirillales	Rhodospirillaceae	Candidatus Riegeria	uncultured bacterium
5504530933076bb00ecf1f99afbf98ba	0	0	0	0	0	0.0180723	0	0	0	0	Bacteria	Proteobacteria	Alphaproteobacteria	Rhodobacterales	Rhodobacteraceae	HIMB11	Unassigned
55270e18c33aec5bed81037cd55ecb17	0	0	0	0	0	0.0120482	0	0	0	0	Bacteria	Actinobacteria	Acidimicrobiia	Actinomarinales	Actinomarinaceae	Candidatus Actinomarina	uncultured bacterium
555fd543eee696aed7a48acc20f8d1f1	0	0	0	0	0	0.0120482	0	0	0	0	Bacteria	Proteobacteria	Gammaproteobacteria	SAR86 clade	Unassigned	Unassigned	Unassigned
55bd6d7ea4b4b1980268df3751084eee	0	0	0	0.0722892	0	0.060241	0	0	0.0240964	1.3494	Bacteria	Proteobacteria	Gammaproteobacteria	Pseudomonadales	Pseudomonadaceae	Pseudomonas	Unassigned
55f37a17d75c0292f5b6ddb5f169abc6	0	0	0	0	0	0	0.0903614	0	0	0	Bacteria	Proteobacteria	Gammaproteobacteria	Salinisphaerales	Salinisphaeraceae	Salinisphaera	Unassigned
55fa5ecc1003ffbb1b697c6354fd2bd0	0	0	0	0	0.0481928	0	0	0	0	0	Bacteria	Proteobacteria	Gammaproteobacteria	Aeromonadales	Aeromonadaceae	Oceanisphaera	Unassigned
56120415c9d30fbcf91d029cbd767635	0	0.0240964	0	0	0	0	0	0	0	0	Bacteria	Proteobacteria	Alphaproteobacteria	Sphingomonadales	Sphingomonadaceae	Unassigned	Unassigned
561f9d88b50044f62f276ae7286c4340	1.35542	0.481928	0.0481928	0.76506	0.493976	3.14458	0.0843373	0.108434	0.108434	0.903614	Bacteria	Proteobacteria	Gammaproteobacteria	Chromatiales	Chromatiaceae	Candidatus Thiobios	Unassigned
5633fab4729b0799ad88f3c0abb71edc	0	0	0	0	0	0.0662651	0	0	0	0	Bacteria	Proteobacteria	Gammaproteobacteria	SAR86 clade	Unassigned	Unassigned	Unassigned
5655486b2d0638c2c29d29004f4c402b	0	0	0	0	0	0	0.120482	0	0	0	Bacteria	Proteobacteria	Alphaproteobacteria	SAR11 clade	Clade II	uncultured bacterium	uncultured bacterium
5661e8c6f7da0a8fecc61dd24ce567e7	0	0.0843373	0	0	0	0	0	0	0	0	Bacteria	Bacteroidetes	Bacteroidia	Chitinophagales	Saprospiraceae	Saprospira	Unassigned
566444bc4241ad4ec8e9e5d8f4562668	0	0	0	0.493976	0	0	0.253012	0	0.475904	0	Bacteria	Actinobacteria	Actinobacteria	Micrococcales	Micrococcaceae	Micrococcus	Unassigned
56f334820c02b796c52eb771ca96acfb	0	0	0	0	0	0	0	0.0361446	0	0	Bacteria	Gemmatimonadetes	Gemmatimonadetes	Gemmatimonadales	Gemmatimonadaceae	uncultured	uncultured bacterium
57245b1bec16cb3af86b5ae4e17788df	0	0	0	0	0	0.0180723	0	0	0	0	Bacteria	Proteobacteria	Alphaproteobacteria	SAR11 clade	Clade III	Unassigned	Unassigned
574484838376799c684d5533ffb8f2f9	0	0	0	0	0	0	0	0	0	0.0060241	Bacteria	Bacteroidetes	Bacteroidia	Flavobacteriales	Cryomorphaceae	uncultured	uncultured bacterium
574f5681eefe6fbcdc10b4466c3c02f8	0.0301205	0	0	0	0	0	0	0	0	0	Archaea	Euryarchaeota	Methanobacteria	Methanobacteriales	Methanobacteriaceae	Methanobacterium	uncultured archaeon
577aebbabd3c39d53f9072daca92e227	0.060241	0	0	0	0	0	0	0	0	0	Bacteria	Firmicutes	Bacilli	Bacillales	Bacillaceae	Bacillus	Unassigned
585e450ff291f08f1ffa02b5f877383e	0	0	0	0	0	0	0.0421687	0	0	0	Bacteria	Firmicutes	Clostridia	Clostridiales	Ruminococcaceae	Unassigned	Unassigned
588c04aa21e3123d678af31918c6a7c5	0.108434	0	0	0.108434	0	0	0	0	0	0	Bacteria	Spirochaetes	Leptospirae	Leptospirales	Leptospiraceae	Leptospira	Unassigned
589a5ad10582cac346057c35f1bc29ff	0.409639	0	0	0	0	0	0	0	0	0	Bacteria	Firmicutes	Clostridia	Clostridiales	Family XII	Fusibacter	uncultured bacterium
58a2a3438bb487685ec78cd380ddb6ad	0	0	0	0	0	0.0120482	0	0	0	0	Bacteria	Proteobacteria	Alphaproteobacteria	Puniceispirillales	SAR116 clade	Unassigned	Unassigned
58c9c29cb0ad53f3f58d63abb14539b9	0	0	0	0	0	0.0421687	0	0	0	0	Bacteria	Proteobacteria	Alphaproteobacteria	SAR11 clade	Clade I	Clade Ia	Unassigned
5915adc0e4a4a14eaeb20d38f7ba735c	0	0	0	0	0	0.0240964	0	0	0	0	Bacteria	Proteobacteria	Alphaproteobacteria	Rhodobacterales	Rhodobacteraceae	Unassigned	Unassigned
5925bdc40609086abfbf4578094302b7	0	0	0	0	0	0.0180723	0	0	0	0	Bacteria	Bacteroidetes	Bacteroidia	Flavobacteriales	NS9 marine group	uncultured marine bacterium	uncultured marine bacterium
59577ff70bda84f8faaa2d1ffa5cab5b	0	0	0	0	0	0	0	0.186747	0	0	Bacteria	Proteobacteria	Deltaproteobacteria	Desulfobacterales	Desulfobacteraceae	Unassigned	Unassigned
59866ad11f765c9d84066d681c85d218	0	0	0	0.0963855	0	0	0	0	0	0	Bacteria	Proteobacteria	Alphaproteobacteria	Puniceispirillales	SAR116 clade	Unassigned	Unassigned
59f8c1e11c2beccb75d1cb8d8e824d2a	0	0	0.0060241	0	0	0	0.0240964	0	0	0	Bacteria	Bacteroidetes	Bacteroidia	Cytophagales	Cyclobacteriaceae	uncultured	Unassigned
5a16e6054314394431ddccfaa7ae79f7	0	0	0	0	0	0.0120482	0	0	0	0	Bacteria	Proteobacteria	Alphaproteobacteria	SAR11 clade	Clade III	Unassigned	Unassigned
5a3c3bfdf704b4ea099d1cd2df15698d	1.50602	0	0	0	0	0	0	0	0	0	Bacteria	Firmicutes	Bacilli	Bacillales	Bacillaceae	Bacillus	Unassigned
5a581f8b7ceb0b6439c8ce09b9ac3f40	0	0	0	0.0180723	0	0	0	0	0	0	Bacteria	Proteobacteria	Gammaproteobacteria	Vibrionales	Vibrionaceae	Vibrio	Unassigned
5a866fd754dc6c6f25b7aed879601ff6	0	0	0	0	0	0	0	0.0903614	0	0	Bacteria	Firmicutes	Bacilli	Bacillales	Family XII	Exiguobacterium	Unassigned
5a9c5d4bdfba1622e320daeaaaa17dad	0	0	0	0	0	0	0	0	0	0.0180723	Bacteria	Proteobacteria	Alphaproteobacteria	Rhizobiales	Rhizobiaceae	Ochrobactrum	Unassigned
5b3c216fc3a18ea1f6943a817332ea97	0	0	0	0	0	0.0180723	0	0	0	0	Bacteria	Proteobacteria	Alphaproteobacteria	Puniceispirillales	SAR116 clade	Unassigned	Unassigned
5b45581694264115904d37dd5b36d878	0.108434	0	0	0	0	0	0	0	0	0	Bacteria	Bacteroidetes	Bacteroidia	Chitinophagales	Saprospiraceae	uncultured	uncultured bacterium
5b5630f7385a4925bbc0868b1ca41df2	0	0	0	0	0.060241	0	0	0	0	0	Bacteria	Bacteroidetes	Bacteroidia	Chitinophagales	Chitinophagaceae	Sediminibacterium	Unassigned
5b73132890303bfccb0c66523640a630	0	0	0	0	0.162651	0	0	0	0	0	Bacteria	Proteobacteria	Alphaproteobacteria	Puniceispirillales	SAR116 clade	Unassigned	Unassigned
5ba2483da975fc172d6e5a0c2b5bfaff	0	0.0542169	0	0	0	0	4.13855	0	0.186747	0	Bacteria	Bacteroidetes	Chlorobia	Chlorobiales	Chlorobiaceae	Unassigned	Unassigned
5bb6936d9b4553d2eb7ce47cc3889d02	0	0.283133	2.75904	0	0	0	0	0	0	0	Bacteria	Firmicutes	Clostridia	Clostridiales	JTB215	Unassigned	Unassigned
5c3e4e12698a6d70e197e2d9ecd3aa79	0	0	0	0.0963855	0	0	0	0	0	0	Bacteria	Proteobacteria	Gammaproteobacteria	SAR86 clade	Unassigned	Unassigned	Unassigned
5c44e4f8a0780c3b8d40b37e0f68fac8	0.0481928	0	0	0	0	0	0	0	0	0	Bacteria	Firmicutes	Clostridia	Clostridiales	Ruminococcaceae	uncultured	uncultured bacterium
5c4a29f4a02ba5784ac1700acb0aecad	0	0	0.0240964	0	0	0	0	0	0	0	Bacteria	Firmicutes	Clostridia	Clostridiales	Clostridiaceae 3	uncultured	Unassigned
5c666c9155097387ce0f3f8fead0e74b	0	0	0	0	0	0	0.150602	0	0	0	Bacteria	Actinobacteria	Actinobacteria	Micrococcales	Dermabacteraceae	Brachybacterium	Unassigned
5c7f1bbfc4b0385196a323830ebda1b9	0	0.0301205	0	0	0	0	0	0	0	0	Bacteria	Bacteroidetes	Bacteroidia	Flavobacteriales	Flavobacteriaceae	NS5 marine group	Unassigned
5ca93cb2353f72b4891b2476322e61e9	0	0	0	0	0.108434	0	0	0	0	0	Bacteria	Proteobacteria	Deltaproteobacteria	Oligoflexales	Oligoflexaceae	Pseudobacteriovorax	Unassigned
5d11a98927ffcc066abf81fb8b5c0e48	0	0	0	0	0	0	0.548193	0	0	0	Bacteria	Firmicutes	Bacilli	Lactobacillales	Lactobacillaceae	Lactobacillus	uncultured bacterium
5d1581f95838148f7fd582dd597e225d	0	0	0	0	0	0	0.0542169	0	0	0.39759	Bacteria	Bacteroidetes	Bacteroidia	Flavobacteriales	Flavobacteriaceae	NS5 marine group	Unassigned
5dae78f46356446628441fa6c90e1c41	0	0	0.0240964	0	0	0	0	0	0	0	Bacteria	Proteobacteria	Gammaproteobacteria	Alteromonadales	Pseudoalteromonadaceae	Algicola	Unassigned
5df259505b1d03e305aa1e721b0ba35b	0	0	0	0	0	0	0.162651	0	0	0	Archaea	Nanoarchaeaeota	Woesearchaeia	Unassigned	Unassigned	Unassigned	Unassigned
5dff69e74015b1d61f99c0392c9ffdb3	0	0	0	0	0	0.0180723	0	0	0	0	Bacteria	Firmicutes	Clostridia	Clostridiales	Peptostreptococcaceae	Unassigned	Unassigned
5e7443615f797769b489da89d06f3153	0	0.0361446	0	0	0	0	0	0	0	0	Bacteria	Proteobacteria	Deltaproteobacteria	Oligoflexales	Oligoflexaceae	uncultured	Unassigned
5e786f3307462fb05aeb5dc80cde0e07	0	0	0	0	0	0.0120482	0	0	0	0	Bacteria	Cyanobacteria	Oxyphotobacteria	Nostocales	Unassigned	Unassigned	Unassigned
5e9caa89150f479dbd6c105ab9e0b1fc	0	0	0	0	0	0	0	0	0.0481928	0	Bacteria	Actinobacteria	Actinobacteria	Bifidobacteriales	Bifidobacteriaceae	Gardnerella	Unassigned
5ed2f747e89d97ffbc432e88df726bfb	0	0	0	0	0	0.445783	0.379518	0	0	1.04217	Bacteria	Proteobacteria	Alphaproteobacteria	Puniceispirillales	SAR116 clade	Unassigned	Unassigned
5f004af4d10d1d0e3d8841bef71551da	0	0	0	0	0	0.0060241	0	0	0	0	Bacteria	Proteobacteria	Gammaproteobacteria	Betaproteobacteriales	Unassigned	Unassigned	Unassigned
5f742daf6eb49144cc3407e574dc3be5	0	0	0	0.120482	0	0	0	0	0	0	Bacteria	Proteobacteria	Gammaproteobacteria	Oceanospirillales	Nitrincolaceae	Neptuniibacter	Unassigned
5f9bd9ca7ea3e4a3aede22dec69f845b	0	0.0240964	0	0	0	0	0	0	0	0	Bacteria	Proteobacteria	Gammaproteobacteria	Oceanospirillales	Endozoicomonadaceae	Endozoicomonas	uncultured bacterium
6006f71db9ebb1ceb305c0002a459cce	0	0.0481928	0	0	0	0	0	0	0	0	Bacteria	Patescibacteria	Gracilibacteria	JGI 0000069-P22	Unassigned	Unassigned	Unassigned
600cdbf08bf98bae3fac94145d31a397	0	0	0.168675	0	0	0	0	0	0	0	Bacteria	Firmicutes	Clostridia	Clostridiales	Peptostreptococcaceae	Tepidibacter	Unassigned
601516f2e5e3873927e4923151be3e81	0	0	0.0180723	0	0	0	0	0	0.0240964	0	Bacteria	Proteobacteria	Alphaproteobacteria	Rhizobiales	Rhizobiaceae	Ochrobactrum	Unassigned
6051f7df62670c438aa1d4a5adbe2e56	0	0	0	0	0	0	0	0	0	0.0120482	Bacteria	Proteobacteria	Deltaproteobacteria	Oligoflexales	Oligoflexaceae	uncultured	Unassigned
607fe97ce648f951333854b52c680083	0	0	0	0.126506	0	0	0	0	0	0	Bacteria	Proteobacteria	Gammaproteobacteria	EC3	uncultured bacterium	uncultured bacterium	uncultured bacterium
6087e0ff6e19d3308de7c2bbb5da2ea4	0	0	0	0	0	0	0.0662651	0	0	0	Bacteria	Bacteroidetes	Ignavibacteria	Ignavibacteriales	PHOS-HE36	Unassigned	Unassigned
60b8ffc0d965848c5a6c579f19fd4a86	0.572289	0	0	0	0	0	0	0	0	0	Bacteria	Proteobacteria	Gammaproteobacteria	Vibrionales	Vibrionaceae	Vibrio	Unassigned
60ea6122764a0d4e4ba200a1270a9005	0	0.0421687	0	0	0	0	0	0	0	0	Bacteria	Firmicutes	Clostridia	Clostridiales	Family XI	Anaerococcus	uncultured bacterium
61097b8af50bba1ab8f44d13f1bf3cf6	0	0	0.0120482	0	0	0	0	0	0	0	Bacteria	Spirochaetes	Spirochaetia	Spirochaetales	Spirochaetaceae	Candidatus Marispirochaeta	Unassigned
612bf3a88e6b63a9ba5b2b80f1fa352c	0	0	0	0	0	0	0	0.240964	0	0	Bacteria	Verrucomicrobia	Verrucomicrobiae	Verrucomicrobiales	Rubritaleaceae	Rubritalea	Unassigned
6139af8a7d409168201aa182e25b0ccc	0	0	0.108434	0	0	0	0	0	0	0	Bacteria	Bacteroidetes	Bacteroidia	Bacteroidales	Unassigned	Unassigned	Unassigned
617d47f49c3682565c5ea5d90d449cd1	0	0	0	0	0	0.0120482	0	0	0	0	Bacteria	Proteobacteria	Gammaproteobacteria	Cellvibrionales	Spongiibacteraceae	Unassigned	Unassigned
627f4899b2437a02fe2e727c89c0c9bd	0	0	0	0	0.0843373	0	0	0	0	0	Bacteria	Proteobacteria	Gammaproteobacteria	Pseudomonadales	Pseudomonadaceae	Pseudomonas	Unassigned
6294fc962ac437e8da9c4e7ab76dfb7d	0	0	0	0	0	0	0	0	0	0.0180723	Bacteria	Proteobacteria	Gammaproteobacteria	Gammaproteobacteria Incertae Sedis	Unknown Family	uncultured bacterium	uncultured bacterium
62b045474e9b63d70ca3a39efe496752	0	0	0	0	0	0	0.060241	0	0	0	Bacteria	Proteobacteria	Deltaproteobacteria	Desulfobacterales	Desulfobacteraceae	Unassigned	Unassigned
62b224862a12396fc5dd93d217c5a2db	0	0	0	0	0	0	0	0.0783133	0	0	Bacteria	Proteobacteria	Gammaproteobacteria	Alteromonadales	Pseudoalteromonadaceae	Pseudoalteromonas	Unassigned
62dab800d0e0a1c189d6272f41661c10	0.421687	0	0	0	0	0	0	0	0	0	Bacteria	Bacteroidetes	Bacteroidia	Cytophagales	Cyclobacteriaceae	Fabibacter	Unassigned
636e1d82851b57f6d9e4b9e863217220	0	0	0	0	0	0	0	0	0	0.0240964	Bacteria	Proteobacteria	Gammaproteobacteria	Oceanospirillales	Unassigned	Unassigned	Unassigned
638ab04b351012ce8e6e25bba8733e03	0	0	0	0.753012	0.475904	0	0.0662651	0	0	0.415663	Bacteria	Proteobacteria	Gammaproteobacteria	Betaproteobacteriales	Neisseriaceae	uncultured	uncultured bacterium
63a06049b5083dc471816ea33abb068f	0	0	0.0421687	0.126506	0	0	0	0	0	0	Bacteria	Proteobacteria	Gammaproteobacteria	Oceanospirillales	Saccharospirillaceae	Thalassolituus	Unassigned
63b291fe149675f82eaba1abdd74d415	0	0	0	0	0	0.0903614	0	0	0	0	Bacteria	Fusobacteria	Fusobacteriia	Fusobacteriales	Fusobacteriaceae	Propionigenium	uncultured bacterium
63fa38a4847efdba8801b90571e109b4	0	0	0	0	0	0	0.0662651	0	0	0	Bacteria	Proteobacteria	Gammaproteobacteria	Steroidobacterales	Woeseiaceae	Woeseia	uncultured gamma proteobacterium
64016d5013b85ba218c3d89d0163d241	0	0	0	0	0.0421687	0	0	0	0.13253	0	Bacteria	Proteobacteria	Gammaproteobacteria	Pseudomonadales	Moraxellaceae	Acinetobacter	Unassigned
64217651f57e0f5620855b574e51befc	0	0	0	0	0	0.0240964	0	0	0	0	Bacteria	Proteobacteria	Alphaproteobacteria	uncultured	uncultured bacterium	uncultured bacterium	uncultured bacterium
642b17a20ecba15fa6d679b133e16c75	0	0	0	0	0	0.0120482	0	0	0	0	Bacteria	Proteobacteria	Gammaproteobacteria	B2M28	Unassigned	Unassigned	Unassigned
642c94539cb30d91ddcccb2c9be0a961	0	0	0	0	0	0	0	0	0	0.337349	Bacteria	Proteobacteria	Gammaproteobacteria	Oceanospirillales	Halomonadaceae	Halomonas	Unassigned
642eb1cf51328eea051ba15b8b9270a0	0	0.373494	0	0	0	0	0	0	0	0	Bacteria	Proteobacteria	Gammaproteobacteria	Vibrionales	Vibrionaceae	Vibrio	Unassigned
64348966616a52a68c2bbca136992032	0	0	0	0	0	0.0180723	0	0	0	0	Bacteria	Proteobacteria	Alphaproteobacteria	SAR11 clade	Clade III	Unassigned	Unassigned
64850f6a452e91e93b4a9fcc4b236638	0	0	0	0	0.0903614	0.295181	0	0	0	0	Bacteria	Bacteroidetes	Bacteroidia	Flavobacteriales	Flavobacteriaceae	uncultured	Unassigned
64a8550ff329fd0a2b892580aa717394	0	0	0	0	0	0.0120482	0	0	0	0	Bacteria	Bacteroidetes	Bacteroidia	Flavobacteriales	NS9 marine group	uncultured bacterium	uncultured bacterium
64d9f04245db99ca387c03dc7468ca55	0	0	0	0	0	0	0	0	0	0.0120482	Bacteria	Bacteroidetes	Bacteroidia	Cytophagales	Cyclobacteriaceae	Unassigned	Unassigned
650dcb70ee622c5b4b60140ecab4c3c0	0	0	0	0	0	0.0361446	0	0	0	0	Bacteria	Proteobacteria	Deltaproteobacteria	Desulfuromonadales	Desulfuromonadaceae	Pelobacter	Unassigned
6551aef5b74216fd07a9a331e96987dd	0	0	0	0.451807	0	1.27108	0.403614	0.253012	0	2.5241	Bacteria	Proteobacteria	Alphaproteobacteria	Puniceispirillales	SAR116 clade	uncultured bacterium	uncultured bacterium
656159779c25fa6b4ab5e8fa1ff3a3ba	0	0	0	0	0	0.0240964	0	0	0	0	Bacteria	Proteobacteria	Gammaproteobacteria	Pseudomonadales	Moraxellaceae	Acinetobacter	Unassigned
6567c5381c80ccecf6114e26e10f9adf	0	0	0	0.0361446	0	0	0	0	0.13253	0	Bacteria	Proteobacteria	Gammaproteobacteria	Pseudomonadales	Moraxellaceae	Psychrobacter	Unassigned
659a5bfda622bcfab0ca236fc3453f38	0	0	0	0	0	0	0	0	0	0.120482	Bacteria	Proteobacteria	Gammaproteobacteria	Pseudomonadales	Moraxellaceae	Acinetobacter	Unassigned
659f8a8b92740162067dfdd5bdcbf90b	0	0	0	0.156627	0	0	0	0	0	0	Bacteria	Actinobacteria	Actinobacteria	Micrococcales	Microbacteriaceae	Leucobacter	Unassigned
65cfb9adc4d3957045aed59fdeed7f95	0.379518	0	0	0	0	0	0	0	0	0	Bacteria	Proteobacteria	Gammaproteobacteria	Vibrionales	Vibrionaceae	Vibrio	Unassigned
65de5b54c13d9069fb6adb8a163bcf68	0	0	0.0120482	0	0	0	0	0	0	0	Bacteria	Proteobacteria	Gammaproteobacteria	Oceanospirillales	Saccharospirillaceae	Oleibacter	uncultured bacterium
65e5c81cc003418e4d3120ef68ce71d7	0	0	0	0	0	0	0	0	0.108434	0	Bacteria	Proteobacteria	Alphaproteobacteria	Thalassobaculales	uncultured	Unassigned	Unassigned
6632d6476c108912f78633147245091d	0	0	0	0	0	0	0	0	0.120482	0	Bacteria	Proteobacteria	Alphaproteobacteria	Rhizobiales	Methyloligellaceae	uncultured	uncultured bacterium
667d7f701e148546fca410b961debd32	0	0	0	0	0	0	0	0	0	0.0240964	Bacteria	Proteobacteria	Alphaproteobacteria	Unassigned	Unassigned	Unassigned	Unassigned
66b64f7a0ff5c0c3ec4dfe0134d09657	0	0.060241	0	0	0	0	0	0	0	0	Bacteria	Bacteroidetes	Bacteroidia	Flavobacteriales	Weeksellaceae	Chryseobacterium	Unassigned
66f851aa631bc2775f8c59b2d323216b	0	0	0	0	0	0	0	0	0	0.0120482	Bacteria	Proteobacteria	Alphaproteobacteria	Rhodobacterales	Rhodobacteraceae	Unassigned	Unassigned
67e09fd3fc0211453b3d40dc00c04da1	0	0	0.0662651	0	0	0	0	0	0	0	Bacteria	Firmicutes	Clostridia	Clostridiales	Ruminococcaceae	Unassigned	Unassigned
68057217135b67926d5df0b5f2b6d3ba	0	0	0	0	0	0.0421687	0	0	0	0	Bacteria	Bacteroidetes	Bacteroidia	Flavobacteriales	NS9 marine group	uncultured bacterium	uncultured bacterium
682f6c767a33fb29323c5aedef9a5031	0	0	0	0	0	0	0	0	0.0963855	0	Bacteria	Bacteroidetes	Bacteroidia	Flavobacteriales	NS9 marine group	uncultured bacterium	uncultured bacterium
6835a462118b162c83ca9b00d1c82419	0.0722892	0	0	0	0	0	0	0	0	0	Bacteria	Proteobacteria	Gammaproteobacteria	Vibrionales	Vibrionaceae	Vibrio	Unassigned
6851513012e4ba9c4cb7ec4c1031a63d	0	0	0	0	0	0.0662651	0	0	0	0	Bacteria	Verrucomicrobia	Verrucomicrobiae	Opitutales	Puniceicoccaceae	Coraliomargarita	Unassigned
6882da8574049afefd031f4397011723	0	1.3253	0.415663	0	0	0	0	0	0	0	Bacteria	Firmicutes	Clostridia	Clostridiales	Family XII	Fusibacter	uncultured bacterium
68af9abde8f7bff3fc2ff08081d63b36	0	0	0	0	0	0.0120482	0	0	0	0	Bacteria	Fibrobacteres	Fibrobacteria	Fibrobacterales	Fibrobacteraceae	uncultured	uncultured microorganism
698cd9e874acca9430dd26745d705b97	0	0	0	0	0	0	0	0	0	0.0120482	Bacteria	Proteobacteria	Alphaproteobacteria	Rhodospirillales	Magnetospirillaceae	Magnetospirillum	Unassigned
69a682e522e7b3b7f3ed46faab01b7e8	0	0	0	0	0	0	0	0	0.0722892	0	Bacteria	Proteobacteria	Alphaproteobacteria	SAR11 clade	Clade II	uncultured bacterium	uncultured bacterium
69dc9fcee0804008f5847e52ef64f263	0	0	0	0	0	0	0	0	0	0.0361446	Bacteria	Planctomycetes	Pla4 lineage	uncultured bacterium	uncultured bacterium	uncultured bacterium	uncultured bacterium
69dcd6162dadb4aea3d56bb38f467d18	0	0	0	0	0	0	0.060241	0	0	0	Bacteria	Proteobacteria	Gammaproteobacteria	Enterobacteriales	Enterobacteriaceae	Escherichia-Shigella	uncultured bacterium
6a0fedbe256d2f6a7c38a336e38d6fb8	0.0180723	0	0	0	0	0	0	0	0	0	Bacteria	Planctomycetes	Planctomycetacia	Planctomycetales	Rubinisphaeraceae	SH-PL14	uncultured bacterium
6a1899c89a0323d1d9746fe3fd939947	0	0	0	0	0	0	0	0	0.0060241	0	Bacteria	Proteobacteria	Gammaproteobacteria	Pseudomonadales	Moraxellaceae	Enhydrobacter	Unassigned
6a45a572154e4bd29c1713647a5dd4c5	0	0	0	0	0.10241	0	0	0	0.0963855	0	Bacteria	Proteobacteria	Gammaproteobacteria	Pseudomonadales	Moraxellaceae	Acinetobacter	Unassigned
6a97b8fd31a134aba6a316903bbf8408	0	0	0.53012	0	0	0	0	0	0	0	Bacteria	Halanaerobiaeota	Halanaerobiia	Halanaerobiales	Halobacteroidaceae	uncultured	Unassigned
6abe2e072476955958c84ef527e90090	0	0	0	0	0	0.0240964	0	0	0	0	Bacteria	Bacteroidetes	Bacteroidia	Flavobacteriales	Flavobacteriaceae	NS5 marine group	uncultured Flavobacteriaceae bacterium
6ac6f9c0593d427bdb29f30e90c0279d	0.0361446	0	0	0	0	0	0	0	0	0	Bacteria	Planctomycetes	Planctomycetacia	Planctomycetales	Rubinisphaeraceae	Planctomicrobium	uncultured bacterium
6b32ed3ed7581166ac6341e59022b6db	0	0	0	0	0	0	0	0	0	0.0301205	Bacteria	Verrucomicrobia	Verrucomicrobiae	Verrucomicrobiales	Rubritaleaceae	Rubritalea	Unassigned
6b603512b8e7144f87741a29fc4d1a6c	0	0	0	0	0	0	0	0.0662651	0	0	Bacteria	Firmicutes	Bacilli	Lactobacillales	Enterococcaceae	Enterococcus	Unassigned
6b928c22d882b31df69dba6b16b196c0	0	0	0	0	0	0	0	0	0	0.0120482	Bacteria	Proteobacteria	Gammaproteobacteria	Alteromonadales	Marinobacteraceae	Marinobacter	Unassigned
6b9c010d779d5a31e1818ec2d50b0156	0	0	0	0	0	0.0180723	0	0	0	0	Bacteria	Proteobacteria	Alphaproteobacteria	Rhodobacterales	Rhodobacteraceae	HIMB11	Unassigned
6b9dcac1f8307cfe52db3930b2b04096	0	0	0	0	0	0.0903614	0	0	0	0	Bacteria	Bacteroidetes	Bacteroidia	Chitinophagales	Saprospiraceae	uncultured	Unassigned
6bf4f4c3d7a2686bc5099fb24a12202d	0	0	0	0	0	0	0	0	0	0.0240964	Bacteria	Proteobacteria	Gammaproteobacteria	Ectothiorhodospirales	Thioalkalispiraceae	Unassigned	Unassigned
6bf6c73ebf3c013b17bb1b7a9dbf24b1	0	0	0.0783133	0	0	0	0	0	0	0	Bacteria	Proteobacteria	Gammaproteobacteria	Vibrionales	Vibrionaceae	Vibrio	Unassigned
6c0ed92b1dbc992f70ab8e0ac896a12d	1.09036	0	0	0	0	0	0	0	0	0	Bacteria	Bacteroidetes	Bacteroidia	Flavobacteriales	Weeksellaceae	Chryseobacterium	Unassigned
6c36a345fcba03121548246c615cf35d	0	0	0.174699	0.957831	1.38554	2.49398	1.26506	0.451807	0.253012	4.16867	Bacteria	Proteobacteria	Alphaproteobacteria	SAR11 clade	Clade III	Unassigned	Unassigned
6c4caa350222c76da29ee8e00a103c84	0	0	0	0	0	0	0.0301205	0	0	0	Bacteria	Firmicutes	Clostridia	Clostridiales	Ruminococcaceae	Unassigned	Unassigned
6c7237dbe976dccd50dab6c124152533	0	0	0	0	0	0.0240964	0	0	0	0	Bacteria	Proteobacteria	Alphaproteobacteria	SAR11 clade	Clade I	Clade Ia	uncultured bacterium
6c892474e1caabc73f94ccc013ab3938	0	0	0.0783133	0	0	0	0	0	0	0	Bacteria	Bacteroidetes	Bacteroidia	Bacteroidales	Marinilabiliaceae	uncultured	uncultured bacterium
6d0adbf98cff14e1941ecd4821020421	0	0	0	0	0	0	0	0	0	0.0240964	Bacteria	Bacteroidetes	Bacteroidia	Flavobacteriales	Flavobacteriaceae	NS4 marine group	uncultured marine bacterium
6d2e29db3517c36e8a8b86c0ef158f86	0.355422	0.144578	0	0	0.126506	0.524096	0.204819	0.542169	0.114458	0.951807	Bacteria	Bacteroidetes	Bacteroidia	Flavobacteriales	Flavobacteriaceae	NS5 marine group	Unassigned
6d5bde6b0add34752b9d16b7457ab949	0	0	0	0	0	0.0722892	0	0	0	0	Bacteria	Bacteroidetes	Bacteroidia	Chitinophagales	Saprospiraceae	uncultured	Unassigned
6d915753bc4d10ba3857b483a3618980	0	0	0	0	0	0.0240964	0	0	0	0	Bacteria	Bacteroidetes	Bacteroidia	Flavobacteriales	Flavobacteriaceae	NS5 marine group	Unassigned
6da2e8477b1c35adae0448c0624ed667	0	0.807229	0	0	0	0	0	0	0	0	Bacteria	Epsilonbacteraeota	Campylobacteria	Campylobacterales	Arcobacteraceae	Arcobacter	Unassigned
6dac6d5d801a24ea1893b976380821d2	0.0903614	0	0	0	0	0	0	0	0	0	Bacteria	Patescibacteria	Gracilibacteria	uncultured bacterium	uncultured bacterium	uncultured bacterium	uncultured bacterium
6eb6dc6eae0b53b3e5d26aba8c4f64c8	0	0.0361446	0	0	0	0	0.0421687	0	0	0	Bacteria	Proteobacteria	Gammaproteobacteria	Xanthomonadales	Rhodanobacteraceae	Dokdonella	uncultured bacterium
6ec419bd5cc74d7c509a2459c6a11ba5	0	0	0	0	0	0	0.0361446	0	0	0	Bacteria	Proteobacteria	Deltaproteobacteria	Desulfobacterales	Desulfobulbaceae	uncultured	Unassigned
6f1d36c4e258c1d9fb63ba89ae26413f	0	0	0	0.26506	0	0	0	0	0	0	Bacteria	Proteobacteria	Gammaproteobacteria	Vibrionales	Vibrionaceae	Photobacterium	Unassigned
6f58531374c66946c3a90c5d4ded9bd9	0.0240964	0	0	0	0	0	0	0	0	0	Bacteria	Proteobacteria	Gammaproteobacteria	SAR86 clade	uncultured bacterium	uncultured bacterium	uncultured bacterium
6f75a12eaff196cea4258685d290d863	0.162651	0.180723	0	0.590361	0.578313	0	0.240964	0.0843373	0	0	Bacteria	Actinobacteria	Actinobacteria	Micrococcales	Micrococcaceae	Micrococcus	Unassigned
6f7a6f2d65087c5a546186ba8f2428fa	0	0	0	0	0	0.0120482	0	0	0	0	Bacteria	Proteobacteria	Deltaproteobacteria	SAR324 clade(Marine group B)	uncultured bacterium	uncultured bacterium	uncultured bacterium
6fae1a5a2293154ca47076cdb5b95e13	0	0	0	0.0240964	0	0	0	0	0	0	Bacteria	Bacteroidetes	Bacteroidia	Bacteroidales	Bacteroidetes BD2-2	uncultured bacterium	uncultured bacterium
6fde29a677229b7bd20e05b1124fd79b	0	0	0	0	0	0	0	0	0.0481928	0	Bacteria	Patescibacteria	Parcubacteria	Candidatus Kaiserbacteria	uncultured bacterium	uncultured bacterium	uncultured bacterium
6fe00492633c2a9388082c7eaa1d28fd	0.10241	0.36747	0	0	0	0	0	0.180723	0	0	Bacteria	Firmicutes	Clostridia	Clostridiales	Family XI	Peptoniphilus	uncultured bacterium
6ff8a3b29bc541ba862f6f707fae67af	0	0	0	0.144578	0	0	0	0	0	0	Bacteria	Proteobacteria	Gammaproteobacteria	Vibrionales	Vibrionaceae	Vibrio	Unassigned
701a4ed10476c8c92bab130b243d80ec	0	0	0	0	0	0	0.0240964	0	0	0	Bacteria	Proteobacteria	Gammaproteobacteria	Pasteurellales	Pasteurellaceae	Haemophilus	uncultured bacterium
7067190bd2c0538decd4e15f959bae8b	0.150602	0	0	0	0	0	0	0	0	0	Bacteria	Bacteroidetes	Bacteroidia	Sphingobacteriales	Lentimicrobiaceae	Lentimicrobium	Unassigned
708893d14f7ea03d9a11c7cc845ee6c5	0	0	0	0	0	0.0662651	0	0.13253	0	0	Bacteria	Verrucomicrobia	Verrucomicrobiae	Verrucomicrobiales	Rubritaleaceae	Roseibacillus	Unassigned
70b3f54c8971bdcfeb38499346ee73b7	0	0	0	0	0	0	0	0.0662651	0	0	Bacteria	Proteobacteria	Gammaproteobacteria	Betaproteobacteriales	Neisseriaceae	uncultured	uncultured bacterium
717a2ad0a7ab03c4fd4c129b9c77be33	0.228916	0	0	0	0	0	0	0	0	0	Bacteria	Proteobacteria	Alphaproteobacteria	Rhizobiales	Rhizobiaceae	Ochrobactrum	Unassigned
71a4f3898124f1642965be62549c81fc	0	0	0	0	0	0	0	0	0	0.0301205	Bacteria	Planctomycetes	BD7-11	Unassigned	Unassigned	Unassigned	Unassigned
71b34f6bade69a6b3ffd088b2e99714a	2.30723	2.48795	0.656627	9.95181	21.2892	0.0421687	8.63253	18.2108	13.0482	0.271084	Bacteria	Proteobacteria	Gammaproteobacteria	Pseudomonadales	Pseudomonadaceae	Pseudomonas	Unassigned
71dc35c644901df580163b30aa5161e1	0	0	0	0.114458	0	0	0	0.180723	0	0	Bacteria	Proteobacteria	Alphaproteobacteria	SAR11 clade	Clade I	Clade Ib	uncultured bacterium
71ea3944aedc8bafc7ee3aa3f5ba5676	0	0	0	0	0	0.0180723	0	0	0	0	Bacteria	Proteobacteria	Gammaproteobacteria	SAR86 clade	uncultured bacterium	uncultured bacterium	uncultured bacterium
71ee0aa79c5e03460de92e0f56033b71	0.53012	0	0	0	0	0	0	0	0	0	Bacteria	Proteobacteria	Gammaproteobacteria	Vibrionales	Vibrionaceae	Vibrio	Unassigned
7204f9a6b5173ac7ec8db3de361d8378	0	0	0	0	0.162651	0	0	0	0.0662651	0	Bacteria	Proteobacteria	Alphaproteobacteria	Sneathiellales	Sneathiellaceae	AT-s3-44	Unassigned
720bce9c73db04b1820b85234fc2942c	2.79518	1.38554	2.12048	0	0	0	0	0	0	0	Bacteria	Epsilonbacteraeota	Campylobacteria	Campylobacterales	Arcobacteraceae	Arcobacter	Unassigned
72b08ba2c2256d9ffe0de866998c032b	0	0	0	0	0.144578	0	0	0.0662651	0	0	Bacteria	Proteobacteria	Gammaproteobacteria	Enterobacteriales	Enterobacteriaceae	Serratia	Unassigned
72be1b8e18a080898cf2e530f8015358	0	0	0.0361446	0	0	0	0	0	0	0	Bacteria	Proteobacteria	Alphaproteobacteria	Thalassobaculales	uncultured	Unassigned	Unassigned
72cfdcd7e7723293375ff33f3abfe189	0.0301205	0	0	0	0	0	0	0	0	0	Bacteria	Firmicutes	Clostridia	Clostridiales	Christensenellaceae	Christensenellaceae R-7 group	uncultured bacterium
72f1608d12eaa73985192097e53619d8	0.0481928	0	0	0	0	0	0	0	0	0	Bacteria	Firmicutes	Bacilli	Lactobacillales	Lactobacillaceae	Lactobacillus	uncultured bacterium
7301ac70adc00af2faf7a43c4128cee0	0	0	0	0	0	0	0.222892	0	0	0	Bacteria	Proteobacteria	Alphaproteobacteria	Sphingomonadales	Sphingomonadaceae	Erythrobacter	Unassigned
73be5e543f3b4539b5a12c7298fbc6b4	0.0421687	0	0	0	0	0	0	0	0	0	Bacteria	Proteobacteria	Gammaproteobacteria	Pseudomonadales	Pseudomonadaceae	Pseudomonas	Unassigned
745e7487250cd0c1c15fade2c3fd4661	0	0	0	0	0	0	0	0.259036	0	0	Bacteria	Proteobacteria	Alphaproteobacteria	SAR11 clade	Clade I	Clade Ib	Unassigned
74777bb2ae13ed898645e8d209d6e394	0.120482	0	0	0	0	0	0	0	0	0	Bacteria	Spirochaetes	Spirochaetia	Spirochaetales	Spirochaetaceae	Spirochaeta 2	Unassigned
747fa0a8294ecf151dd721c239892ebd	0	0	0.0240964	0	0	0	0	0	0	0	Bacteria	Proteobacteria	Gammaproteobacteria	Cellvibrionales	Spongiibacteraceae	BD1-7 clade	uncultured bacterium
7482449b3aefd6727a2b24a4e751e29d	0	0.0843373	0	0	0	0	0	0	0	0	Bacteria	Proteobacteria	Gammaproteobacteria	Francisellales	Francisellaceae	Francisella	Unassigned
74d717095e36d898fe04d01854f7167c	0	0	0	0	0	0.385542	0.277108	0.403614	0	0.638554	Bacteria	Proteobacteria	Alphaproteobacteria	Puniceispirillales	SAR116 clade	Unassigned	Unassigned
74dfa4284a9f623aea984e8a67547f86	0	0.403614	0	0	0	0	0	0	0	0	Bacteria	Bacteroidetes	Bacteroidia	Bacteroidales	Marinilabiliaceae	Carboxylicivirga	uncultured bacterium
74e29a9e67d73d76ad570d2419ff4a5e	0.0421687	0	0	0	0	0	0.180723	0	0	0	Bacteria	Bacteroidetes	Bacteroidia	Flavobacteriales	Flavobacteriaceae	NS5 marine group	uncultured Flavobacteriaceae bacterium
74ff31e810796604ca5c942008c80a66	0	0	0	0	0	0	0	0.138554	0	0	Bacteria	Proteobacteria	Gammaproteobacteria	Alteromonadales	Shewanellaceae	Shewanella	Unassigned
7528b948607bb42b6a8d74617dd1c76b	0	0	0	0	0	0	0	0	0	0.0180723	Bacteria	Proteobacteria	Gammaproteobacteria	Pseudomonadales	Pseudomonadaceae	Pseudomonas	Unassigned
753a9dc70e2e177b102f474fcb6dbc3a	0.0180723	0	0	0	0	0	0	0	0	0	Bacteria	Proteobacteria	Deltaproteobacteria	Myxococcales	mle1-27	Unassigned	Unassigned
7546bffe798632e0b02c9c9a1abc45cf	0	0	0	0	0	0	0.259036	0	0	0.668675	Bacteria	Bacteroidetes	Bacteroidia	Flavobacteriales	Cryomorphaceae	uncultured	uncultured bacterium
756c2a53e076d73eef099bdc904483ac	0.536145	0	0	0	0.295181	1.07831	0	0	0.259036	1.45181	Bacteria	Proteobacteria	Alphaproteobacteria	Puniceispirillales	SAR116 clade	Unassigned	Unassigned
756d3bd13cf937c8c8f8fca6ea19e8e4	0	0	0	0.0301205	0	0.228916	0	0	0	0	Bacteria	Bacteroidetes	Bacteroidia	Flavobacteriales	NS9 marine group	uncultured bacterium	uncultured bacterium
7582dbc5bfb942abdcb0eafd2c94a434	0	0	0	0	0	0	0	0	0.0301205	0	Bacteria	Bacteroidetes	Bacteroidia	Flavobacteriales	Weeksellaceae	Cloacibacterium	Unassigned
759eed40c9c01c9887e6af802c13e9fd	0	0	0.0662651	0	0	0	0	0	0	0	Bacteria	Spirochaetes	Spirochaetia	Spirochaetales	Spirochaetaceae	Spirochaeta 2	uncultured organism
75c9c8b9bdf8207c58ed710388c1eaaf	0	0	0	0	0.0722892	0	0	0	0	0	Bacteria	Proteobacteria	Gammaproteobacteria	Oceanospirillales	Endozoicomonadaceae	Endozoicomonas	uncultured bacterium
75d31bd5e2414b34d719f2030a86f798	0	0	0	0	0	0	0	0.0722892	0	0	Bacteria	Proteobacteria	Gammaproteobacteria	Pseudomonadales	Pseudomonadaceae	Pseudomonas	Unassigned
7611236212d678651b90fb8c641cd023	0.0903614	0	0	0	0	0	0	0	0	0	Bacteria	Proteobacteria	Alphaproteobacteria	Rhizobiales	Rhizobiaceae	Unassigned	Unassigned
761be860af3c3f7104fc7cd9b2f3f00e	0	0	0	0	0	0	0.0963855	0	0	0	Bacteria	Proteobacteria	Gammaproteobacteria	Enterobacteriales	Enterobacteriaceae	Enterobacter	Unassigned
763d8b900b3491065cc56c1db8f508d1	0	0	0	5.5241	6.68072	0	2.89157	0	10.8494	0	Bacteria	Proteobacteria	Alphaproteobacteria	Rhodobacterales	Rhodobacteraceae	Paracoccus	Unassigned
766ce337dcd7a0b89802cc6e217bbdcd	0	0	0	0	0	0	0	0	0	0.0180723	Bacteria	Bacteroidetes	Bacteroidia	Cytophagales	Cyclobacteriaceae	Fabibacter	Unassigned
76b86bd9824293bcde6c3b2925be417d	0	0	0	0	0	0	0	0	0	0.0301205	Bacteria	Proteobacteria	Gammaproteobacteria	Pseudomonadales	Moraxellaceae	Acinetobacter	Unassigned
7727af8d7dfa50bdec51248c382047ad	0	0	0.0180723	0	0	0	0	0	0	0	Bacteria	Latescibacteria	uncultured bacterium	uncultured bacterium	uncultured bacterium	uncultured bacterium	uncultured bacterium
7757f732d17ffb479ecea0e61b10bf8c	0	0	0	0	0	0.0120482	0	0	0	0	Bacteria	Proteobacteria	Alphaproteobacteria	Puniceispirillales	SAR116 clade	Unassigned	Unassigned
777014af2f31d328ab8e77c203afecfc	0	0	0	0	0	0	0	0	0	0.0662651	Bacteria	Fusobacteria	Fusobacteriia	Fusobacteriales	Fusobacteriaceae	Propionigenium	Unassigned
77736789904f48c3127244656a00fdf6	0	0	0	0.13253	0	0	0	0	0	0	Bacteria	Bacteroidetes	Bacteroidia	Flavobacteriales	Flavobacteriaceae	NS5 marine group	Unassigned
785ced2e884a19f39e5efd47f77cc314	0.0421687	0	0	0	0	0	0	0	0	0	Bacteria	Bacteroidetes	Bacteroidia	Bacteroidales	Paludibacteraceae	Paludibacter	uncultured bacterium
79628c80068d76fb8854eadacb0754b3	0	0	0	0	0.0240964	0	0	0	0	0	Bacteria	Proteobacteria	Alphaproteobacteria	Rhizobiales	Rhizobiaceae	Allorhizobium-Neorhizobium-Pararhizobium-Rhizobium	Unassigned
7988669a3407014e9181038cf38a84fe	0	0	0	0	0	0.0240964	0	0	0	0	Bacteria	Marinimicrobia (SAR406 clade)	Unassigned	Unassigned	Unassigned	Unassigned	Unassigned
799855947fd3676d374eebeb925ba5ff	0	0	0	0	0	0	0.0722892	0	0	0	Bacteria	Spirochaetes	Spirochaetia	Spirochaetales	Spirochaetaceae	uncultured	Unassigned
79c90fa1192dc519505db30ccdedc275	1.04819	2.37952	0	0	0	0	0	0	0	0	Bacteria	Proteobacteria	Gammaproteobacteria	Vibrionales	Vibrionaceae	Unassigned	Unassigned
79fd18764b2938807b756907894c2111	0	0	0	0	0	0.0180723	0	0	0	0	Bacteria	Proteobacteria	Gammaproteobacteria	Oceanospirillales	Pseudohongiellaceae	Pseudohongiella	Unassigned
7a66241fdc58b6bd8efd73f277662573	0	0	0	0	0	0.0180723	0	0	0	0	Bacteria	Proteobacteria	Gammaproteobacteria	Coxiellales	Coxiellaceae	Coxiella	Unassigned
7a86fde1168c8f69ac3f15dae1a575c9	0	0	0	0.0722892	0	0	0	0	0	0	Bacteria	Proteobacteria	Gammaproteobacteria	Cellvibrionales	Halieaceae	OM60(NOR5) clade	uncultured bacterium
7ac59b74be9896ac8624f59a27951927	9.28916	9.70482	1.71084	26.4458	31.0542	0.0481928	27.4277	33.2048	48.9458	0.795181	Bacteria	Proteobacteria	Gammaproteobacteria	Pseudomonadales	Moraxellaceae	Enhydrobacter	uncultured bacterium
7aea5ae4b79ff8166fb3c64c97cba9fe	0	0	0	0	0	0	0	0	0.150602	0	Bacteria	Patescibacteria	Saccharimonadia	Saccharimonadales	uncultured bacterium	uncultured bacterium	uncultured bacterium
7af89a03c0be491e781b725c14d312e8	0	0	0	0	0.0843373	0	0	0	0	0	Bacteria	Proteobacteria	Gammaproteobacteria	Pseudomonadales	Moraxellaceae	Acinetobacter	Unassigned
7b0658e1b7faef22f45a3901b6e793da	0	0	0	0	0	0	0	0	0	0.0180723	Bacteria	Patescibacteria	Gracilibacteria	uncultured bacterium	uncultured bacterium	uncultured bacterium	uncultured bacterium
7b6a7581ada4c09b6507429d3e635ed5	0	0	0	0	0	0	0	0	0	0.0542169	Bacteria	Proteobacteria	Gammaproteobacteria	Oceanospirillales	Nitrincolaceae	Marinobacterium	Unassigned
7b8c79e595f4db6e664f647d8c8dee6c	0	0.0722892	0	0	0	0	0	0	0	0	Bacteria	Proteobacteria	Alphaproteobacteria	SAR11 clade	Clade I	Clade Ib	Unassigned
7bda3f717b5ddc57365576829eca1569	0	0	0.0843373	0.0843373	0	0	0	0	0	0	Bacteria	Proteobacteria	Deltaproteobacteria	Desulfobacterales	Desulfobacteraceae	Unassigned	Unassigned
7c2fb9558d9d372357c58297f2dbb6d3	0	0	0	0	0	0.0120482	0	0	0	0	Bacteria	Proteobacteria	Alphaproteobacteria	Puniceispirillales	SAR116 clade	Unassigned	Unassigned
7c8ac8d98b4b2bdca21a4fd7aaecd82a	0	0	0	0	0	0.0120482	0	0	0	0	Bacteria	Bacteroidetes	Bacteroidia	Cytophagales	Flammeovirgaceae	Flammeovirga	Unassigned
7c92937154ab6e184ff1a67ce9a69003	0	0	0	0.0783133	0	0	0	0	0	0	Bacteria	Proteobacteria	Alphaproteobacteria	Rhodobacterales	Rhodobacteraceae	Unassigned	Unassigned
7cd3b2b158f46feeb391713654b42699	0.0180723	0	0	0	0	0	0	0	0	0	Bacteria	Firmicutes	Clostridia	Clostridiales	Christensenellaceae	Christensenellaceae R-7 group	uncultured bacterium
7ced3b88aae59bbd094f7269ef0325bd	0	0	0	0	0	0	0.0421687	0	0	0	Bacteria	Bacteroidetes	Bacteroidia	Cytophagales	Flammeovirgaceae	Flammeovirga	Unassigned
7cedb8b1edc80f56bfb137cde71ec8f8	0	0	0	0	0	0	0	0.180723	0	0	Bacteria	Chloroflexi	Dehalococcoidia	vadinBA26	uncultured bacterium	uncultured bacterium	uncultured bacterium
7d3aba1456e3f21dfe26318dcc7e141f	0.0903614	0	0	0	0	0	0	0	0	0	Bacteria	Firmicutes	Clostridia	Clostridiales	TSAC18	uncultured Clostridia bacterium	uncultured Clostridia bacterium
7d512e98011554720992ce1de450d58d	0	0	0	0	0	0	0.0421687	0	0	0	Bacteria	Bacteroidetes	Bacteroidia	Flavobacteriales	NS9 marine group	Unassigned	Unassigned
7d6614293ae2f1f81ea973a0189e4e26	0	0.409639	0	0	0	0	0	0	0	0	Bacteria	Proteobacteria	Gammaproteobacteria	Alteromonadales	Shewanellaceae	Ferrimonas	Unassigned
7d7f0a57df56859b1d0b42350a665cb0	0	0	0	0	0	0.0120482	0	0	0	0	Bacteria	Bacteroidetes	Bacteroidia	Flavobacteriales	NS9 marine group	uncultured bacterium	uncultured bacterium
7db6a5be17366aee229aa81f1ac0ca30	0	0	0	0	0	0.0120482	0	0	0	0	Bacteria	Proteobacteria	Alphaproteobacteria	Rhodobacterales	Rhodobacteraceae	HIMB11	Unassigned
7eae1e2cee8392b165a347851c120436	0.409639	0	0	0	0	0	0	0	0	0	Bacteria	Actinobacteria	Actinobacteria	Micrococcales	Microbacteriaceae	Leifsonia	Unassigned
7eb14c0ff92d7233e63f61d269d7860b	0	0	0	0	0	0.0120482	0	0	0	0	Bacteria	Proteobacteria	Gammaproteobacteria	Alteromonadales	Psychromonadaceae	Psychromonas	Unassigned
7eb62bc6b1cb72b82f04b5da16aed136	0	0	0	0	0	0	0	0.572289	0	0	Bacteria	Proteobacteria	Gammaproteobacteria	Cellvibrionales	Unassigned	Unassigned	Unassigned
7ec9451b47a57b1420498532f8b8f9d6	0	0	0	0	0	0	0	0	0.0783133	0	Bacteria	Proteobacteria	Alphaproteobacteria	Sphingomonadales	Sphingomonadaceae	Sphingomonas	Unassigned
7f76606cf2d190af7ff98e8c949e93ee	0	0	0	0	0	0.060241	0	0	0	0	Bacteria	Proteobacteria	Alphaproteobacteria	Rhodobacterales	Rhodobacteraceae	HIMB11	uncultured bacterium
7feb4b02e226974325185cb17050a45b	0	0	0	0	0	0.0180723	0	0	0	0	Bacteria	Bacteroidetes	Bacteroidia	Cytophagales	Cyclobacteriaceae	uncultured	Unassigned
80089b2d9d9dca5c713095b780946922	0	0	0	0	0	0.0120482	0	0	0	0	Bacteria	Proteobacteria	Deltaproteobacteria	Bdellovibrionales	Bdellovibrionaceae	Bdellovibrio	Unassigned
8009f931c1b2457f0fd24f08358ab06b	0	0	0	0	0	0.0481928	0	0	0	0	Bacteria	Bacteroidetes	Bacteroidia	Bacteroidales	Prolixibacteraceae	Unassigned	Unassigned
808972abfc7da0040e5a430d29ad8371	0	0	0	0	0	0.0180723	0	0	0	0	Bacteria	Bacteroidetes	Bacteroidia	Flavobacteriales	NS9 marine group	Unassigned	Unassigned
81110c3ab8e524e4cc7ed19303e3fde7	0	0	0	0	0	0.0722892	0	0	0	0	Bacteria	Proteobacteria	Alphaproteobacteria	Puniceispirillales	SAR116 clade	Unassigned	Unassigned
81815999f0f75b8d2da35b701ba2b8a0	0	0	0	0.0783133	0	0.271084	0	0	0	0.192771	Bacteria	Proteobacteria	Alphaproteobacteria	Rhodobacterales	Rhodobacteraceae	uncultured	uncultured bacterium
81dba876efe867dbfb464622acf0d8ba	0	0	0	0	0	0	0	0.0783133	0	0	Bacteria	Proteobacteria	Gammaproteobacteria	Pseudomonadales	Pseudomonadaceae	Pseudomonas	Unassigned
823f39fe196cb11d93b8776670156a22	0	0	0	0	0	0	0	0	0	0.114458	Bacteria	Proteobacteria	Gammaproteobacteria	Oceanospirillales	Endozoicomonadaceae	Endozoicomonas	uncultured bacterium
8268e5b95a0cdd0c319e0e29b66a9004	0.259036	0	1.39157	0	0	0	0	0	0	0	Bacteria	Firmicutes	Clostridia	Clostridiales	Unassigned	Unassigned	Unassigned
827a6764dfeffb7e13e8c8eb722798e7	0	0	0	0	0	0	0	0	0	0.0903614	Bacteria	Proteobacteria	Gammaproteobacteria	Alteromonadales	Pseudoalteromonadaceae	Pseudoalteromonas	Unassigned
83000058e15dc449f15a057743daa018	0	0	0	0.0662651	0	0	0	0	0	0	Bacteria	Proteobacteria	Gammaproteobacteria	Oceanospirillales	Oleiphilaceae	Oleiphilus	Unassigned
830c77b6da7d9dae528659893dd6c026	0	0	0	0	0.0662651	0	0	0	0	0	Bacteria	Proteobacteria	Gammaproteobacteria	Pseudomonadales	Moraxellaceae	Acinetobacter	Unassigned
83141f797f67cd17c29dc701aa6d9b47	0	0	0	0	0	0.0120482	0	0	0	0	Bacteria	Proteobacteria	Alphaproteobacteria	Puniceispirillales	SAR116 clade	uncultured bacterium	uncultured bacterium
833aa919c65d5765782fb72604ec189d	0	0	0	0	0	0	0.0542169	0	0	0	Bacteria	Proteobacteria	Deltaproteobacteria	SAR324 clade(Marine group B)	Unassigned	Unassigned	Unassigned
835309e4f0fc3a41f057b101b34ca058	0	0	0	0	0	0.0481928	0	0	0	0	Bacteria	Proteobacteria	Alphaproteobacteria	Rhodospirillales	Terasakiellaceae	Terasakiella	Unassigned
836c1f7c316ca9ef64ee6b645088c182	0	0	0	0	0	0	0	0	0	0.0361446	Bacteria	Proteobacteria	Alphaproteobacteria	Thalassobaculales	Nisaeaceae	OM75 clade	Unassigned
836d172fe2acfea6e6740cfc30f973f4	0.0843373	0	0	0	0	0	0	0	0	0	Bacteria	Firmicutes	Clostridia	Clostridiales	Lachnospiraceae	Unassigned	Unassigned
8384366637f326be6589e0d10552e353	0	0	0.0060241	0	0	0	0	0	0	0	Bacteria	Proteobacteria	Deltaproteobacteria	SAR324 clade(Marine group B)	Unassigned	Unassigned	Unassigned
83c27d4e54b355146600e2e53e1ac0a1	0	0	0	0	0	0.0120482	0	0	0	0	Bacteria	Proteobacteria	Gammaproteobacteria	SAR86 clade	Unassigned	Unassigned	Unassigned
845c27e9dda9a7d63e1d47a8ce3b46ec	0	0	0	0	0	0	0.0783133	0	0	0	Bacteria	Proteobacteria	Alphaproteobacteria	SAR11 clade	Clade I	Clade Ib	uncultured bacterium
846e592ab4f9d0ad3925f28449ca760e	0.277108	0	0	0	0	0	0.126506	0	0.120482	0	Bacteria	Proteobacteria	Alphaproteobacteria	Dstr-E11	uncultured alpha proteobacterium	uncultured alpha proteobacterium	uncultured alpha proteobacterium
84906feb72056f1e68f6e534b9edb7a0	0	0	0	0	0	0.0361446	0	0	0	0	Bacteria	Proteobacteria	Gammaproteobacteria	SAR86 clade	uncultured bacterium	uncultured bacterium	uncultured bacterium
84a51f6ea2c0a9e2fbf173f9197bcf53	0	0	0	0	0	0.0722892	0	0	0	0	Bacteria	Proteobacteria	Alphaproteobacteria	Rhodobacterales	Rhodobacteraceae	Unassigned	Unassigned
84f01c9c8d2c0f60cb091a353deefb96	0	0	0	0	0.271084	0	0.204819	0	0	0	Bacteria	Proteobacteria	Gammaproteobacteria	Betaproteobacteriales	Methylophilaceae	OM43 clade	Unassigned
84f33138c7a4aa25c33b1252052c2732	0	0	0	0	0.060241	0	0	0	0	0	Bacteria	Proteobacteria	Gammaproteobacteria	Pasteurellales	Pasteurellaceae	uncultured	uncultured bacterium
8513b6e45d608376bd736afc4d45d3a7	0	0	0	0	0	0	0	0.0783133	0	0	Bacteria	Proteobacteria	Gammaproteobacteria	Steroidobacterales	Woeseiaceae	Woeseia	uncultured bacterium
851c0c8deed4d1a9f319ef9bd7877cd9	0.271084	0.253012	0	0	0	0	0	0	0	0	Bacteria	Proteobacteria	Gammaproteobacteria	Vibrionales	Vibrionaceae	Vibrio	Unassigned
85771f431e33f3f36bbc5a0392a6f3a8	0	0	0	0	0	0	0.0481928	0	0	0	Bacteria	Proteobacteria	Gammaproteobacteria	Oceanospirillales	Saccharospirillaceae	Unassigned	Unassigned
859d4b5433d701a7222315ee49ce1d50	0	0	0	0	0	0	0	0	0	0.0361446	Bacteria	Bacteroidetes	Bacteroidia	Bacteroidales	Prolixibacteraceae	Roseimarinus	uncultured Bacteroidetes bacterium
85ceb2bbc6d29a59f6e65df5627d1aaa	0	0	0	0	0	0	0	0	0	0.355422	Bacteria	Proteobacteria	Alphaproteobacteria	Puniceispirillales	SAR116 clade	Unassigned	Unassigned
85df038e908f8de3b002b1dec3f9d670	0	0	0	0	0	0	0.0301205	0	0	0	Bacteria	Proteobacteria	Deltaproteobacteria	Bdellovibrionales	Bdellovibrionaceae	Bdellovibrio	uncultured bacterium
865e0813d885428cb3f307b1b7da247b	0.144578	0	0	0	0	0	0	0.0843373	0	0	Bacteria	Spirochaetes	Spirochaetia	Spirochaetales	Spirochaetaceae	Candidatus Marispirochaeta	uncultured organism
86dc3e647c6db7965f1515c4f3a7bcc8	0	0	0	0	0	0.0180723	0	0	0	0	Bacteria	Proteobacteria	Alphaproteobacteria	SAR11 clade	Clade III	Unassigned	Unassigned
87154cafac38e361b9c9c265144fa933	0.0481928	0	0	0	0	0	0	0	0	0	Bacteria	Bacteroidetes	Bacteroidia	Bacteroidales	Prevotellaceae	Prevotella 7	uncultured Prevotellaceae bacterium
878af556fed1723df41883e2c4c7912d	0	0	0	0.186747	0	0.536145	0	0.162651	0	0.150602	Bacteria	Bacteroidetes	Bacteroidia	Flavobacteriales	NS9 marine group	uncultured bacterium	uncultured bacterium
87937e5413a7309fe2ff002ac9bb849a	0	0	0	0.156627	0.26506	1.42771	0.289157	0.186747	0	1.74699	Bacteria	Proteobacteria	Alphaproteobacteria	SAR11 clade	Clade III	Unassigned	Unassigned
883add5a579aa1e5292ebcb379c67947	0	0	0	0	0.518072	0	0	0	0	0	Bacteria	Proteobacteria	Alphaproteobacteria	Thalassobaculales	uncultured	Unassigned	Unassigned
8895984e30ef516b13eaa289610757c3	0	0	0	0	0	0	0	0	0	0.246988	Bacteria	Proteobacteria	Gammaproteobacteria	Pseudomonadales	Moraxellaceae	Acinetobacter	Unassigned
88e55f6e70cb1d296e2cf0e711248185	0	0	0	0.0361446	0	0	0	0	0	0	Bacteria	Proteobacteria	Deltaproteobacteria	Oligoflexales	Oligoflexaceae	Pseudobacteriovorax	Unassigned
88eab14dd027eaa6d65cc8ad98739add	0	0	0	0	0	0.0180723	0	0	0	0	Bacteria	Planctomycetes	OM190	Unassigned	Unassigned	Unassigned	Unassigned
8920c3a8f3a9465af2ef12fc68fec1ad	0	0	0	0.10241	0	0	0.0662651	0	0	0	Bacteria	Actinobacteria	Actinobacteria	Corynebacteriales	Corynebacteriaceae	Corynebacterium 1	uncultured bacterium
89260d812c3748e9f58f3672ce02ed89	0	0	0	0	0	0	0.0421687	0	0	0	Bacteria	Bacteroidetes	Bacteroidia	Cytophagales	Cyclobacteriaceae	Fulvivirga	Unassigned
8943f55b9eb86db7681b3b1aeb50dad8	0	0	0	0.0662651	0	0	0	0	0	0	Bacteria	Bacteroidetes	Bacteroidia	Cytophagales	Cyclobacteriaceae	uncultured	uncultured bacterium
894fb33ee69cd509cd78ddd1384735c0	0	0	0	0	0	0	0	0	0	0.0481928	Bacteria	Proteobacteria	Deltaproteobacteria	Oligoflexales	Oligoflexaceae	uncultured	Unassigned
896c7dc076027b2323dbe4975060369f	0	0	0	0	0	0	0	0	0.0421687	0	Bacteria	Actinobacteria	Actinobacteria	Micrococcales	Micrococcaceae	Rothia	uncultured bacterium
898935bdf20eb2f0ecc10c5407ec11f1	0	0	0	0	0	0.0120482	0	0	0	0	Bacteria	Fibrobacteres	Fibrobacteria	Fibrobacterales	Fibrobacteraceae	uncultured	uncultured bacterium
89ce3439bd0ddf404c5cef464670a87a	0	0	0	0	0	0.0180723	0	0	0	0	Bacteria	Proteobacteria	Deltaproteobacteria	NB1-j	Unassigned	Unassigned	Unassigned
8a8b1e06fc82790f22c42e2eb3fd7912	0.0120482	0	0	0	0	0	0	0	0	0	Bacteria	Proteobacteria	Alphaproteobacteria	Caulobacterales	Hyphomonadaceae	Hyphomonas	Unassigned
8ac1365ed235dc5a143960811f1cc794	0	0.0542169	0	0	0	0	0	0	0	0	Bacteria	Bacteroidetes	Bacteroidia	Flavobacteriales	Flavobacteriaceae	Formosa	uncultured marine bacterium
8b63cc563fbf1db09522149a664de8bb	0	0	0	0	0	0	0	0	0	0.0421687	Bacteria	Bacteroidetes	Bacteroidia	Chitinophagales	Saprospiraceae	uncultured	Unassigned
8b7fc5178b51d0e033584bf2130a53c9	0	0	0	0	0.13253	0	0	0	0	0	Bacteria	Proteobacteria	Gammaproteobacteria	Alteromonadales	Shewanellaceae	Ferrimonas	Unassigned
8bf1fccf7d95523cc86a147606286539	0	0	0	0	0	0	0	0.192771	0.0963855	0	Bacteria	Proteobacteria	Alphaproteobacteria	Rhodovibrionales	Kiloniellaceae	Tistlia	Unassigned
8c1fa124e624182c4d0b17969e73f784	0	0	0.391566	0	0	0	0	0	0	0	Bacteria	Bacteroidetes	Bacteroidia	Bacteroidales	Marinilabiliaceae	Carboxylicivirga	uncultured bacterium
8c69157af8d3b3aaa609a5cef4d3b11e	0.0843373	0	0	0	0	0	0	0	0	0	Bacteria	Proteobacteria	Alphaproteobacteria	Rhizobiales	Stappiaceae	Pseudovibrio	Unassigned
8cff2b87b161cf9199d1cc221da53295	0	0	0	0	0	0.0421687	0	0	0	0	Bacteria	Margulisbacteria	Unassigned	Unassigned	Unassigned	Unassigned	Unassigned
8d1c092f87193187b32de1bf305d4f96	0	0	0	0	0	0.0542169	0.0421687	0	0	0	Bacteria	Proteobacteria	Gammaproteobacteria	Oceanospirillales	Pseudohongiellaceae	Pseudohongiella	Unassigned
8d2ce39c00df5f8e3d6188d8b84a9ba0	0	0	0	0	0.108434	0	0	0	0	0	Bacteria	Proteobacteria	Deltaproteobacteria	Desulfobacterales	Desulfobacteraceae	Sva0081 sediment group	uncultured delta proteobacterium
8d55f5c4a3f29cf2e0db85b8d8a64ad2	0.0542169	0	0	0	0	0	0.26506	0	0	0	Bacteria	Bacteroidetes	Bacteroidia	Flavobacteriales	Flavobacteriaceae	Unassigned	Unassigned
8d855b730aede9c396597a4a6d7c98c7	0.379518	0.0903614	0.0421687	0.5	0.740964	2.10241	0.259036	0.524096	0.162651	4.44578	Bacteria	Proteobacteria	Alphaproteobacteria	Puniceispirillales	SAR116 clade	uncultured bacterium	uncultured bacterium
8dc6d11723a2083b76b4e223b468bb78	0	0	0	0	0	0.0421687	0	0	0	0	Bacteria	Proteobacteria	Alphaproteobacteria	Puniceispirillales	SAR116 clade	Unassigned	Unassigned
8e10330fafdf87d1f34e85ae17c54886	0	0	0	0.0843373	0	0	0	0	0	0	Bacteria	Proteobacteria	Deltaproteobacteria	Desulfobacterales	Desulfobulbaceae	uncultured	Unassigned
8e42b5936b8350a1381d42e089fcaf31	0	0	0	0	0	0.0120482	0	0	0	0	Bacteria	Proteobacteria	Gammaproteobacteria	SAR86 clade	Unassigned	Unassigned	Unassigned
8ed76c4b86d047d26782769a57652fcc	0.138554	0	0.0240964	0.277108	0.578313	2.85542	0.150602	0.168675	0	0.228916	Bacteria	Actinobacteria	Acidimicrobiia	Actinomarinales	Actinomarinaceae	Candidatus Actinomarina	uncultured bacterium
8f1c6fd078bce74a0c1211abcad24597	0	0	0	0.10241	0	0	0	0	0	0	Bacteria	Actinobacteria	Actinobacteria	Corynebacteriales	Corynebacteriaceae	Corynebacterium 1	uncultured bacterium
8f60706a739f1c7584a8c33a1b265f2f	0	0	0	0.0843373	0	0	0	0	0	0	Bacteria	Deinococcus-Thermus	Deinococci	Deinococcales	Trueperaceae	Truepera	uncultured organism
8f9e222ba43a58e11771dfece3c82ebd	0	0	0	0	0	0.144578	0	0	0	0	Bacteria	Margulisbacteria	uncultured bacterium	uncultured bacterium	uncultured bacterium	uncultured bacterium	uncultured bacterium
8fcdd3713b065f227472807ab694efa4	0	0	0	0	0	0	0	0.0722892	0	0	Bacteria	Proteobacteria	Gammaproteobacteria	Alteromonadales	Pseudoalteromonadaceae	Algicola	Unassigned
9027b32c583ef6331db033550a6cc654	0	0	0	0	0	0	0	0	0.10241	0	Bacteria	Actinobacteria	Actinobacteria	Streptomycetales	Streptomycetaceae	Streptomyces	Unassigned
904000af4193e13c7f59a058c76251b4	0	0	0	0	0	0.0180723	0	0	0	0	Bacteria	Bacteroidetes	Bacteroidia	Flavobacteriales	Flavobacteriaceae	Unassigned	Unassigned
904fb6b5226596a0370d93a1f6ae1b46	0	0	0	0	0	0.5	0	0	0.060241	0.674699	Archaea	Euryarchaeota	Thermoplasmata	Marine Group II	Unassigned	Unassigned	Unassigned
90d20169234b094f14434806afab5b84	0	0	0	0	0	0.168675	0	0	0	0	Bacteria	Actinobacteria	Acidimicrobiia	Microtrichales	Microtrichaceae	Sva0996 marine group	uncultured bacterium
9118235d8bbdba7759c0bd6311227dde	0	0	0	0	0	0	0	0.0361446	0	0	Bacteria	Planctomycetes	Pla3 lineage	Unassigned	Unassigned	Unassigned	Unassigned
914359a3e46393f29fa45df3f264f9fb	0	0	0	0	0	0.0120482	0	0	0	0	Bacteria	Bacteroidetes	Bacteroidia	Flavobacteriales	Flavobacteriaceae	NS2b marine group	Unassigned
915ef1654b5d3a0c59bd104166193cab	0	0	0.0481928	0	0	0	0	0	0	0	Bacteria	Planctomycetes	Phycisphaerae	Phycisphaerales	Phycisphaeraceae	uncultured	uncultured organism
918ccd68df986fb6df0072b715c44f07	0	0	0	0	0	0	0	0	0	0.0301205	Bacteria	Proteobacteria	Gammaproteobacteria	Cellvibrionales	Cellvibrionaceae	Aestuariicella	Unassigned
91924d8fb92b1d2cc0f473cf03c073fe	0.680723	0.644578	0.807229	0	0	0	0	0	0	0	Bacteria	Epsilonbacteraeota	Campylobacteria	Campylobacterales	Arcobacteraceae	Arcobacter	uncultured bacterium
91a0a8f05e83b93f48f3d5b682ce743c	0	0	0	0	0	0	0	0	0	0.0180723	Bacteria	Proteobacteria	Alphaproteobacteria	Micavibrionales	Micavibrionaceae	uncultured	uncultured bacterium
91b38c4758bc44bd3250162335e95c4c	0	0	0	0	0	0.0120482	0	0	0	0	Bacteria	Patescibacteria	Gracilibacteria	JGI 0000069-P22	uncultured bacterium	uncultured bacterium	uncultured bacterium
91d374888438a124c0c24be9b7277943	0	0	0.0240964	0	0	0	0	0	0	0	Bacteria	Chloroflexi	Chloroflexia	Chloroflexales	Chloroflexaceae	Candidatus Chlorothrix	uncultured organism
925833234f2566bc7b293afa5a9a534e	0	0	0	0.0542169	0	0	0	0	0	0	Bacteria	Proteobacteria	Gammaproteobacteria	Alteromonadales	Alteromonadaceae	Rheinheimera	Unassigned
9299bc5fffc73199b57679ea96220c3d	0	0	0	0	0	0.0180723	0	0	0	0	Bacteria	Proteobacteria	Deltaproteobacteria	Bdellovibrionales	Bdellovibrionaceae	Bdellovibrio	Unassigned
929d5bce5fb9043b4b9da812493a2ace	0	0	0	0	0	0	0	0	0	0.0060241	Bacteria	Cyanobacteria	Melainabacteria	Gastranaerophilales	uncultured organism	uncultured organism	uncultured organism
92df8333b857dd7145926c528a32053e	0	0	0	0	0.0843373	0	0	0	0	0	Bacteria	Proteobacteria	Gammaproteobacteria	SAR86 clade	uncultured bacterium	uncultured bacterium	uncultured bacterium
93211ba3df0d27ac02f93912238e2149	0	0	0	0	0	0.0120482	0	0	0	0	Bacteria	Bacteroidetes	Bacteroidia	Flavobacteriales	NS9 marine group	uncultured bacterium	uncultured bacterium
936e7e5e7ba199a7ab4ae3459fa8e8d2	0	0	0	0	0	0.0481928	0	0	0	0	Bacteria	Bacteroidetes	Bacteroidia	Flavobacteriales	NS9 marine group	uncultured bacterium	uncultured bacterium
93bae4ada1797781ca87dacc0137aefa	0	0	0.0301205	0	0	0	0	0	0	0	Bacteria	Firmicutes	Clostridia	Clostridiales	Syntrophomonadaceae	uncultured	Unassigned
944bd4817fc1f0e62652170a66204e8f	0	0	0	0	0	0.0361446	0	0	0	0	Bacteria	Proteobacteria	Gammaproteobacteria	Cellvibrionales	Spongiibacteraceae	Spongiibacter	Unassigned
948e4dcba540060862c2f6d842228d77	0	0	0	0	0	0.0722892	0	0	0	0	Bacteria	Proteobacteria	Alphaproteobacteria	SAR11 clade	Clade II	uncultured bacterium	uncultured bacterium
94905256383f001a7a97a685b625983c	0.144578	0	0	0.295181	0.228916	0	0	0	0.10241	0.337349	Bacteria	Proteobacteria	Gammaproteobacteria	SAR86 clade	uncultured bacterium	uncultured bacterium	uncultured bacterium
94a4d8e4d0df5a1303964c1c3b313fea	0	0	0	0.108434	0	0	0	0	0	0	Bacteria	Actinobacteria	Actinobacteria	Corynebacteriales	Corynebacteriaceae	Lawsonella	uncultured bacterium
94e84ade1194ce968dcebeac3651789f	0	0	0	0.198795	0	0.277108	0.10241	0	0	0.337349	Bacteria	Bacteroidetes	Bacteroidia	Flavobacteriales	Flavobacteriaceae	NS2b marine group	Unassigned
9525d78c237047d3c2a80aa541f683d4	0	0	0	0	0	0.0120482	0	0	0	0	Bacteria	Proteobacteria	Alphaproteobacteria	Rhodobacterales	Rhodobacteraceae	HIMB11	uncultured bacterium
956755e3fd4893c8644e08a7d8efa2bc	0	0	0	0	0	0	0.638554	0	0	0	Bacteria	Spirochaetes	Spirochaetia	Spirochaetales	Spirochaetaceae	Alkalispirochaeta	uncultured organism
95a141fcd02d67896279992fd0c5d450	0	0	0	0	0	0	0.198795	0	0	0	Bacteria	Bacteroidetes	Bacteroidia	Bacteroidetes VC2.1 Bac22	uncultured bacterium	uncultured bacterium	uncultured bacterium
95a4126d0ac3625c740d93dceedbe1d4	0.313253	0.0963855	0.0120482	0	0	0	0	0	0	0	Bacteria	Actinobacteria	Actinobacteria	Corynebacteriales	Corynebacteriaceae	Corynebacterium 1	uncultured bacterium
9623681cb37d0ea2687a0594ab4e4c3d	0	0	0	0	0	0	0	0	0	0.0783133	Bacteria	Proteobacteria	Gammaproteobacteria	Betaproteobacteriales	Burkholderiaceae	Massilia	uncultured bacterium
964f3433381e18b9045557e02452d037	0	0	0.26506	0	0	0	0	0	0	0	Bacteria	Proteobacteria	Deltaproteobacteria	Desulfobacterales	Desulfobacteraceae	Unassigned	Unassigned
96705d0a5e14db96b8c18f1c6a9c0269	0.060241	0	0	0	0	0	0	0	0	0	Bacteria	Proteobacteria	Alphaproteobacteria	uncultured	Unassigned	Unassigned	Unassigned
96b7d72d93bf1bd75a1b4e35c4a0bc16	0	0	0	0	0	0.0240964	0	0	0	0	Bacteria	Cyanobacteria	Oxyphotobacteria	Synechococcales	Cyanobiaceae	Synechococcus CC9902	Unassigned
9706faf84100f4c71432c9746e54ad08	0	0	0	0	0	0.0120482	0	0	0	0	Bacteria	Proteobacteria	Gammaproteobacteria	Gammaproteobacteria Incertae Sedis	Unknown Family	uncultured	Unassigned
977bf8e4ed8f74cbe8d9b54a0321a3bd	0	0	0	0	0	0	0.0542169	0	0.13253	0	Bacteria	Proteobacteria	Alphaproteobacteria	Azospirillales	Azospirillaceae	Unassigned	Unassigned
97924a1bd3ee6e8c7f7197a60f8b0fa9	0	0	0	0	0	0	0	0	0	0.120482	Bacteria	Proteobacteria	Alphaproteobacteria	Rhodospirillales	AEGEAN-169 marine group	Unassigned	Unassigned
97ad446a7d467f1fc4a770fe7d82cffc	0	0	0	0	0	0.0120482	0	0	0	0	Bacteria	Proteobacteria	Alphaproteobacteria	SAR11 clade	Clade III	Unassigned	Unassigned
97f7842a7d741ba5cee21ed007ff32e5	0	0	0	0	0	0	0	0	0	0.0240964	Bacteria	Cyanobacteria	Oxyphotobacteria	Unassigned	Unassigned	Unassigned	Unassigned
97fcf5a03bd08fbf59ce4284f9454272	0	0	0	0.0843373	0	0	0	0	0	0	Bacteria	Proteobacteria	Gammaproteobacteria	Oceanospirillales	Nitrincolaceae	Unassigned	Unassigned
984f48ab978c96b9aec090cdefa88679	0.0361446	0	0	0	0	0	0	0	0	0	Bacteria	Bacteroidetes	Bacteroidia	Sphingobacteriales	Sphingobacteriaceae	Unassigned	Unassigned
98b3c9e2f2d7e5456037675ec1426bd8	0	0	0	0	0	0.0180723	0	0	0	0	Bacteria	Proteobacteria	Alphaproteobacteria	Rhodobacterales	Rhodobacteraceae	Unassigned	Unassigned
995029a8bcd0060b038ce16fbe24641e	0	0	0	0	0	0	0	0	0.0240964	0	Bacteria	Patescibacteria	Gracilibacteria	JGI 0000069-P22	uncultured bacterium	uncultured bacterium	uncultured bacterium
997d9e9fd1da3f9995cc6fae1b6bac0d	0	0	0	0	0	0	0	0	0	0.0120482	Bacteria	Bacteroidetes	Bacteroidia	Flavobacteriales	Flavobacteriaceae	Unassigned	Unassigned
99a1de77ad0c3493f086f55370d46b4f	0	0	0	0	0	0.162651	0	0	0	0	Bacteria	Proteobacteria	Gammaproteobacteria	Oceanospirillales	Endozoicomonadaceae	Endozoicomonas	uncultured bacterium
99ac008b8093895a47bf85db5fa0a0e9	0	0	0	0	0	0.0240964	0	0	0	0	Bacteria	Proteobacteria	Alphaproteobacteria	Puniceispirillales	SAR116 clade	Unassigned	Unassigned
99b2f9c4f8cd5e7eb451d3b5211ec2ca	0	0	0	0	0	0	0	0	0.0903614	0	Bacteria	Proteobacteria	Alphaproteobacteria	Rhodobacterales	Rhodobacteraceae	uncultured	Unassigned
99ef5defb2d745e67bc472d5e78f752c	0	0	0	0	0	0.0361446	0	0	0	0	Bacteria	Actinobacteria	Acidimicrobiia	Actinomarinales	uncultured	uncultured bacterium	uncultured bacterium
9a3362b5e6cebf319ab60be4accc954b	0	0.439759	0	0	0	0	0	0	0	0	Bacteria	Proteobacteria	Gammaproteobacteria	Vibrionales	Vibrionaceae	Vibrio	Unassigned
9a95b218c32bdc68bfb1c43a3eba8aeb	0	0	0	0	0	0	0.0421687	0.216867	0	0	Bacteria	Bacteroidetes	Bacteroidia	Flavobacteriales	Flavobacteriaceae	NS5 marine group	Unassigned
9ac2c51bf330d3db0e1380c418c136e1	0	0	0	0	0	0	0.0843373	0	0	0	Bacteria	Proteobacteria	Alphaproteobacteria	Rhodobacterales	Rhodobacteraceae	uncultured	uncultured bacterium
9b12ea3a092730665429c4ba54ea71b3	0	0	0	0.060241	0	0	0	0	0	0	Bacteria	Actinobacteria	Actinobacteria	Micrococcales	Dermacoccaceae	Kytococcus	Unassigned
9b3dc7ecbac22afd828524db433c6b74	0	0	0	0	0	0.0120482	0	0	0	0	Bacteria	Proteobacteria	Gammaproteobacteria	Alteromonadales	Shewanellaceae	Shewanella	Unassigned
9b5c49d34410c21e7833faf6cc1a7279	0	0	0	0	0	0	0	0	0.0060241	0	Bacteria	Planctomycetes	Pla3 lineage	Unassigned	Unassigned	Unassigned	Unassigned
9b90bc4064c1ae3568f420af84ace993	0	0	0	0	0	0.0120482	0	0	0	0	Bacteria	Cyanobacteria	Melainabacteria	Unassigned	Unassigned	Unassigned	Unassigned
9beee8cc4ebc88feb7e0beac7c345767	0	0	0	0	0	0	0	0.180723	0	0	Bacteria	Proteobacteria	Gammaproteobacteria	Cellvibrionales	Unassigned	Unassigned	Unassigned
9bfc21a1a87edbbd5862c1433c3c758c	0	0	0	0	0	0	0	0	0	0.0301205	Bacteria	Proteobacteria	Gammaproteobacteria	Oceanospirillales	Endozoicomonadaceae	Endozoicomonas	Unassigned
9c0da02fa60c6bc9b149b5c0271e2a33	0	0	0	0	0	0	0	0.0843373	0	0	Bacteria	Proteobacteria	Gammaproteobacteria	KI89A clade	Unassigned	Unassigned	Unassigned
9cb8b0e0bc5195871add60f68506ac50	0	0.403614	0.0421687	0	0	0	0	0	0	0	Bacteria	Firmicutes	Clostridia	Clostridiales	Lachnospiraceae	Unassigned	Unassigned
9ce014076550e5a216794d6785e72d70	0	0	0	0.0722892	0	0.63253	0	0.0783133	0	0.120482	Archaea	Euryarchaeota	Thermoplasmata	Marine Group II	Unassigned	Unassigned	Unassigned
9ce99a136c9b537e3641382eec2e6ea3	0	0.0301205	0	0	0	0	0	0	0	0	Bacteria	Proteobacteria	Gammaproteobacteria	Oceanospirillales	Nitrincolaceae	Amphritea	uncultured bacterium
9d4eaa93ae11ef5d1edbe9da87ff8acb	0	0	0	0	0	0.0180723	0	0	0	0	Bacteria	Bacteroidetes	Bacteroidia	Flavobacteriales	NS9 marine group	uncultured bacterium	uncultured bacterium
9d5c0b5048af5309f308500101c481ba	0.216867	0	0	0	0	0	0	0	0	0	Bacteria	Firmicutes	Bacilli	Bacillales	Bacillaceae	Bacillus	Unassigned
9d8a72645e45a0a23e9c25c2ce3e2104	0	0	0	0	0	0.0120482	0	0	0	0	Bacteria	Proteobacteria	Alphaproteobacteria	Rhodobacterales	Rhodobacteraceae	Unassigned	Unassigned
9d9de29e10c85f7f19260035d0c3198d	0	0	0	0	0	0.0783133	0	0	0	0	Bacteria	Bacteroidetes	Bacteroidia	Flavobacteriales	Cryomorphaceae	uncultured	Unassigned
9de28ff1924e827318e6df7cddf04155	0.162651	0	0	0	0	0	0	0	0	0	Bacteria	Bacteroidetes	Bacteroidia	Sphingobacteriales	Sphingobacteriaceae	Sphingobacterium	Unassigned
9e0ddb5e33f09a81e9f5e9e582ca4ec8	0	0	0	0	0	0.0180723	0	0	0	0	Bacteria	Proteobacteria	Deltaproteobacteria	Desulfovibrionales	Desulfovibrionaceae	Desulfovibrio	Unassigned
9e100899dc8811ccc918cb069d309a1e	0	0	0	0	0	0	0.0481928	0	0	0	Bacteria	Bacteroidetes	Bacteroidia	Cytophagales	Cyclobacteriaceae	uncultured	uncultured bacterium
9e225de8e4e0476a30c0cd4c25f0b532	0	0	0	0	0.216867	0	0	0	0	0	Bacteria	Proteobacteria	Gammaproteobacteria	Vibrionales	Vibrionaceae	Vibrio	Unassigned
9e8e1981f5c3df78ab1e90dca5f7a77a	0	0	0	0	0	0	0	0	0.0361446	0	Bacteria	Proteobacteria	Gammaproteobacteria	Oceanospirillales	Endozoicomonadaceae	Endozoicomonas	uncultured bacterium
9ed0f746d8c00db9053bc61172896246	0	0	0	0.0843373	0	0	0	0	0	0	Bacteria	Bacteroidetes	Bacteroidia	Flavobacteriales	Flavobacteriaceae	Aquimarina	Unassigned
9ee53ea5e330c55f8d3e2de64b13902a	0	0	0	0	0	0.0240964	0	0	0	0	Bacteria	Proteobacteria	Alphaproteobacteria	SAR11 clade	Clade I	Clade Ia	Unassigned
9f028bea4cc524e952aaf7b72e8829b0	0	0	0	0.0301205	0	0	0	0	0	0	Bacteria	Bacteroidetes	Bacteroidia	Bacteroidales	Prolixibacteraceae	uncultured	uncultured bacterium
9f5db18f81165473e0e189a533222e36	0	0	0	0	0	0.0120482	0	0	0	0	Bacteria	Proteobacteria	Alphaproteobacteria	Puniceispirillales	SAR116 clade	Unassigned	Unassigned
9fa1120109de7aea2f6052c53b72515e	0	0	0	0	0	0	0.0361446	0	0	0	Bacteria	Patescibacteria	Gracilibacteria	uncultured bacterium	uncultured bacterium	uncultured bacterium	uncultured bacterium
9fad1c627e9a9a688f55f8087dbf3fb6	0.0421687	0	0	0	0	0	0	0	0	0	Bacteria	Firmicutes	Negativicutes	Selenomonadales	Veillonellaceae	Veillonella	uncultured bacterium
9fc08b6d7201a14e2cc58bd504b85989	0.783133	0	0	0	0	0	0	0	0	0	Bacteria	Firmicutes	Bacilli	Lactobacillales	Enterococcaceae	Enterococcus	Unassigned
9fcdcb7e22b71b0ae6fd44676985c601	0	0	0	0	0	0.0120482	0	0	0	0	Bacteria	Proteobacteria	Alphaproteobacteria	Puniceispirillales	SAR116 clade	Unassigned	Unassigned
9fdbd9450393a335720ea8cfe298d205	0	0	0	0	0	0	0.108434	0	0	0	Bacteria	Verrucomicrobia	Verrucomicrobiae	Opitutales	Puniceicoccaceae	Pelagicoccus	Unassigned
9ff453d7c8ed6f6da0566ffe14237f7b	0	0	0	0	0	0	0	0	0	0.0180723	Bacteria	Proteobacteria	Alphaproteobacteria	Rickettsiales	SM2D12	uncultured bacterium	uncultured bacterium
a0453be290357db1385e527ff87e265b	0.0180723	0	0	0	0	0	0	0	0	0	Bacteria	Proteobacteria	Alphaproteobacteria	Rickettsiales	uncultured	Unassigned	Unassigned
a084ef267ab41572709f228164cf6607	0	0	0	0.162651	0	0	0	0	0	0	Bacteria	Proteobacteria	Gammaproteobacteria	Vibrionales	Vibrionaceae	Vibrio	Unassigned
a09a3f868458e1debf3c5415228c70bb	0	0	0	0	0	0	0	0	0	0.0542169	Bacteria	Actinobacteria	Actinobacteria	Frankiales	Geodermatophilaceae	Blastococcus	Unassigned
a0b7ffccac30886af0610c1cc4ee016e	0	0	0	0	0	0.0120482	0	0	0	0	Bacteria	Actinobacteria	Acidimicrobiia	Actinomarinales	Actinomarinaceae	Candidatus Actinomarina	Unassigned
a0d38c355013cb29c38cafb7cdb32a66	0	0	0	0	0	0	0	0	0	0.0060241	Bacteria	Planctomycetes	vadinHA49	uncultured organism	uncultured organism	uncultured organism	uncultured organism
a1127b37942bf330ba6b2b09b0bf99bf	0.0180723	0	0	0	0	0	0	0	0	0	Bacteria	Firmicutes	Clostridia	Clostridiales	Ruminococcaceae	Ruminococcus 2	uncultured bacterium
a16e16096ecfb4fd2049f539c7200b8e	0	0	0	0	0	0	0	0.060241	0	0	Bacteria	Proteobacteria	Alphaproteobacteria	Rickettsiales	Anaplasmataceae	Wolbachia	Unassigned
a176d619c045f306d37c7b87e88b3cab	0.0120482	0	0	0	0	0	0	0	0	0	Bacteria	Proteobacteria	Gammaproteobacteria	Oceanospirillales	Nitrincolaceae	Amphritea	uncultured bacterium
a1cb72729f9fcf8fd75f2a8d5e82c750	0	0	0	0	0	0	0	0	0	0.10241	Bacteria	Proteobacteria	Alphaproteobacteria	Parvibaculales	PS1 clade	Unassigned	Unassigned
a22763c1dfd93de847c0a22c9d4740d4	0	0	0	0	0	0	0	0.0843373	0	0	Bacteria	Actinobacteria	Actinobacteria	Micrococcales	Micrococcaceae	Kocuria	Unassigned
a2698896c0a4b6d432295dcd08f51480	0	0	0	0	0	0.0180723	0	0	0	0	Bacteria	Proteobacteria	Alphaproteobacteria	Puniceispirillales	SAR116 clade	uncultured bacterium	uncultured bacterium
a2ab47a972d7ba0dd12c0f6ac5678efe	0.0180723	0	0	0	0	0	0	0	0	0	Bacteria	Firmicutes	Bacilli	Lactobacillales	Streptococcaceae	Streptococcus	uncultured bacterium
a2f3b96e1a6b22649001f26b19dd086f	0	0	0	0	0	0	0	0.150602	0	0	Bacteria	Bacteroidetes	Bacteroidia	Cytophagales	Cyclobacteriaceae	Fabibacter	Unassigned
a31ab24438d283fefc45d8d6cbfe2832	0	0	0	0	0	0.0180723	0	0	0	0	Bacteria	Proteobacteria	Gammaproteobacteria	Oceanospirillales	Pseudohongiellaceae	Pseudohongiella	Unassigned
a31e8ee1cfc3f18140d8758a90191b9a	0	0	0	0	0	0	0.10241	0	0	0	Bacteria	Bacteroidetes	Bacteroidia	Cytophagales	Amoebophilaceae	uncultured	uncultured bacterium
a3253d833270888a4561f0572b2b9fc6	0	0	0	0	0	0.0180723	0	0	0	0	Bacteria	Proteobacteria	Alphaproteobacteria	Unassigned	Unassigned	Unassigned	Unassigned
a3984b67f4338d141ac272530fb87bd2	0	0	0	0	0	0	0	0.0180723	0	0	Bacteria	Proteobacteria	Gammaproteobacteria	Unassigned	Unassigned	Unassigned	Unassigned
a3dd2e1c16514c94d668bd026f16006c	0	0	0	0.192771	0	0.174699	0.162651	0.186747	0	0.283133	Bacteria	Bacteroidetes	Bacteroidia	Flavobacteriales	Flavobacteriaceae	NS5 marine group	Unassigned
a3ed43a4cc6bef61653915e153b0273b	0.168675	0	0	0	0	0	0	0	0	0	Bacteria	Bacteroidetes	Bacteroidia	Bacteroidales	Marinilabiliaceae	uncultured	uncultured bacterium
a401f4b9949be6e0f97e85f9b7f17d46	0	0	0	0.0542169	0	0	0	0	0	0	Bacteria	Proteobacteria	Gammaproteobacteria	Oceanospirillales	Nitrincolaceae	Marinobacterium	Unassigned
a46d53be258e2f91c6133c572e1e644d	0	0	0	0	0.204819	0.512048	0.222892	0	0.0662651	1.10843	Bacteria	Proteobacteria	Alphaproteobacteria	Puniceispirillales	SAR116 clade	Unassigned	Unassigned
a49921515bd35071815ec94401a642f5	0	0	0	0.0542169	0	0	0	0	0	0	Bacteria	Proteobacteria	Alphaproteobacteria	Thalassobaculales	uncultured	Unassigned	Unassigned
a4f9ae42dde944a901aa872ea92ec2e0	0	0.0421687	0	0	0	0	0	0	0	0	Bacteria	Lentisphaerae	Oligosphaeria	P.palmC41	Unassigned	Unassigned	Unassigned
a5032a1111f9d6aa8ad83fe6b1e6db16	0	0	0.0542169	0	0	0	0	0	0	0	Bacteria	Proteobacteria	Alphaproteobacteria	Rhodospirillales	Rhodospirillaceae	Unassigned	Unassigned
a53f870a5445944af7a54c9eac07304e	0	0	0.0783133	0	0	0	0	0	0	0	Bacteria	Firmicutes	Clostridia	Clostridiales	Syntrophomonadaceae	uncultured	Unassigned
a577e9e30e80efa7631ecb5ccb8437b1	0.10241	0.373494	0.0481928	0	0.493976	0	0	0.222892	0.204819	0	Bacteria	Firmicutes	Bacilli	Bacillales	Staphylococcaceae	Staphylococcus	Unassigned
a589b5fd95348848a26d867cf1d7f636	0	0	0	0.0421687	0	0	0	0	0	0	Bacteria	Firmicutes	Bacilli	Bacillales	Paenibacillaceae	Paenibacillus	Unassigned
a5e1717a39a2e6cbf710eef2c201fc31	0.0120482	0	0	0	0	0	0	0	0	0	Bacteria	Proteobacteria	Gammaproteobacteria	Pseudomonadales	Pseudomonadaceae	Pseudomonas	Unassigned
a5e674dcea0959b4c7f7171560af5450	0.060241	0	0	0.13253	0	0	0	0.10241	0	0	Bacteria	Proteobacteria	Gammaproteobacteria	Enterobacteriales	Enterobacteriaceae	Escherichia-Shigella	Unassigned
a5fc054755c4c1c5993af35bb32714a4	0	0	0	0	0	0	0	0.10241	0	0	Bacteria	Proteobacteria	Alphaproteobacteria	Rhizobiales	Beijerinckiaceae	Methylobacterium	Unassigned
a68b30432bc65558e99a91ebb46fb909	0	0	0	0	0	0	0.060241	0	0	0	Bacteria	Proteobacteria	Alphaproteobacteria	Rhodospirillales	Terasakiellaceae	uncultured	Unassigned
a6df5cd92559fa1c04d82d96226813f7	0	0	0.0060241	0	0	0	0	0	0	0	Bacteria	Proteobacteria	Gammaproteobacteria	Alteromonadales	Alteromonadaceae	Paraglaciecola	Unassigned
a71dfc25779c80fd2b947f1a33b1679c	0	0	0	0	0	0	0	0	0	0.120482	Bacteria	Proteobacteria	Alphaproteobacteria	SAR11 clade	Clade I	Clade Ib	uncultured bacterium
a72222c3f93493964ef5cca2052a1d7b	0.0120482	0	0	0	0	0	0	0	0	0	Bacteria	Bacteroidetes	Ignavibacteria	OPB56	Unassigned	Unassigned	Unassigned
a7e5b6e8b03053b8896b3fa973f73a6a	0.0722892	0	0	0	0.240964	0.331325	0	0	0	0.415663	Bacteria	Proteobacteria	Alphaproteobacteria	SAR11 clade	Clade II	uncultured bacterium	uncultured bacterium
a7e830607b042259225c1bf4b48910e8	0.114458	0	0	0	0	0	0	0	0	0	Bacteria	Patescibacteria	Gracilibacteria	Absconditabacteriales (SR1)	Unassigned	Unassigned	Unassigned
a7eb8925d18c57ed913267f757772d4b	0	0	0	0.0722892	0	0	0	0	0	0	Bacteria	Proteobacteria	Gammaproteobacteria	Pseudomonadales	Pseudomonadaceae	Pseudomonas	Unassigned
a8220a7b03a1af06dd2d53c24981262d	0	0	0	0	0	0	0	0	0	0.0783133	Bacteria	Proteobacteria	Gammaproteobacteria	Oceanospirillales	Litoricolaceae	Litoricola	Unassigned
a8286bbff8d4e15d86f4fe918bac2b8f	0.0662651	0	0	0	0	0	0	0	0	0	Bacteria	Actinobacteria	Thermoleophilia	Solirubrobacterales	67-14	uncultured bacterium	uncultured bacterium
a833a1289a81d3ef9875aac9a23d67b4	0.0662651	0	0	0	0	0	0	0	0	0	Bacteria	Proteobacteria	Gammaproteobacteria	Xanthomonadales	Rhodanobacteraceae	Dokdonella	uncultured bacterium
a83ef03f6535b75f66c372a69a6decab	0	0	0	0	0	0	1.92771	0.180723	0	0	Bacteria	Proteobacteria	Gammaproteobacteria	Vibrionales	Vibrionaceae	Vibrio	Unassigned
a841275bb848270f645bc5ac82152b21	0.150602	0.0722892	0	0	0.0722892	0.156627	0.144578	0	0	0	Bacteria	Proteobacteria	Alphaproteobacteria	Parvibaculales	PS1 clade	Unassigned	Unassigned
a883d09bc780867a15851cbb5feb8962	0	0	0	0	0	0	0.445783	0	0	0	Bacteria	Proteobacteria	Alphaproteobacteria	Rhodobacterales	Rhodobacteraceae	Unassigned	Unassigned
a8d6c12aabb5fb48f7e6672bde0ab315	0	0	0	0	0	0.391566	0	0	0	0.259036	Bacteria	Proteobacteria	Alphaproteobacteria	Puniceispirillales	SAR116 clade	uncultured bacterium	uncultured bacterium
a8f06337d5a1aa615379b0e04ce54f47	0	0	0	0	0.0662651	0.120482	0.0421687	0	0	0	Bacteria	Proteobacteria	Alphaproteobacteria	Parvibaculales	PS1 clade	Unassigned	Unassigned
a93366a8e858cf59e99b878ca85baa42	0	0	0	0.23494	0	0	0	0	0	0.204819	Bacteria	Proteobacteria	Alphaproteobacteria	Puniceispirillales	SAR116 clade	Unassigned	Unassigned
a97eae02b8bd9d1650631b8be24f4e2a	0	0	0	0	0	0.0120482	0	0	0	0	Bacteria	Proteobacteria	Gammaproteobacteria	Ectothiorhodospirales	Thioalkalispiraceae	Thiohalophilus	Unassigned
a9a082a9f80b1e8d12b3a96ff991ad58	0	0	0	0	0	0.0120482	0	0	0	0	Bacteria	Proteobacteria	Gammaproteobacteria	SAR86 clade	Unassigned	Unassigned	Unassigned
aa0fba919a2a5f63905e495cc156377a	0	0	0	0	0	0	0	0	0.216867	0	Archaea	Nanoarchaeaeota	Woesearchaeia	Unassigned	Unassigned	Unassigned	Unassigned
aa3f512cec8f2c521aa1b146579927f2	0	0	0	0	0	0	0.0481928	0	0	0	Bacteria	Bacteroidetes	Bacteroidia	Sphingobacteriales	Lentimicrobiaceae	uncultured bacterium	uncultured bacterium
aa50152c6f185cab36e369dd40b18a2d	0	0	0	0	0	0.0180723	0	0	0	0	Bacteria	Proteobacteria	Gammaproteobacteria	Cellvibrionales	Halieaceae	OM60(NOR5) clade	Unassigned
aa9e16010e4817581bee25548f1a5b1b	0	0	0	0	0	0	0	0.0060241	0	0	Archaea	Nanoarchaeaeota	Woesearchaeia	Unassigned	Unassigned	Unassigned	Unassigned
aab1a35bbf64d3c3a586e4fc738e526b	0	0	0	0	0	0.373494	0	0	0	0.216867	Bacteria	Bacteroidetes	Bacteroidia	Flavobacteriales	NS9 marine group	uncultured bacterium	uncultured bacterium
ab10b29722731a06fed620cc67af0367	0	0	0	0.0783133	0	0	0	0	0	0	Bacteria	Proteobacteria	Gammaproteobacteria	Alteromonadales	Alteromonadaceae	Unassigned	Unassigned
ab1b9806e4ce91a85fce702bc3c52296	0	0	0	0	0	0.0120482	0	0	0	0	Bacteria	Lentisphaerae	Oligosphaeria	SS1-B-02-17	Unassigned	Unassigned	Unassigned
ab2f0232197f5f9a671c970fa04d32f7	0	0	0	0	0.0963855	1.56627	0	0	0	0.73494	Bacteria	Proteobacteria	Alphaproteobacteria	SAR11 clade	Clade I	Clade Ia	uncultured bacterium
ab497310eadf7a31ae2fce1bd21fe8c6	0.0180723	0	0	0	0	0	0	0	0	0	Bacteria	Proteobacteria	Gammaproteobacteria	Betaproteobacteriales	Burkholderiaceae	Lautropia	Unassigned
aba67432fd72b98ace9262026bcf1c28	0	0	0	0	0	0	0	0	0.0963855	0	Bacteria	Proteobacteria	Gammaproteobacteria	Alteromonadales	Pseudoalteromonadaceae	Pseudoalteromonas	Unassigned
abbb2e960b29ea41e22fa7d3b56adf3a	0	0	0	0	0	0	0.060241	0	0	0	Bacteria	Proteobacteria	Gammaproteobacteria	Vibrionales	Vibrionaceae	Vibrio	Unassigned
abf06bc0beee331ab3229dd366f58593	0.060241	0	0	0	0	0	0	0	0	0	Bacteria	Bacteroidetes	Bacteroidia	Bacteroidales	Prevotellaceae	Prevotella 7	uncultured bacterium
ac28b614ab2ac09823ddc8402306eaea	0.319277	0	0	0	0	0	0	0	0	0	Bacteria	Bacteroidetes	Bacteroidia	Cytophagales	Cyclobacteriaceae	Fulvivirga	Unassigned
ac504e27669dcc46b2145dbc7534047a	0	0	0	0	0	0	0	0	0	0.0481928	Bacteria	Proteobacteria	Gammaproteobacteria	Unassigned	Unassigned	Unassigned	Unassigned
ac5af5c77251e8d1fd8f7122c39f2097	0	0	0	0	0	0	0	0	0	0.0783133	Bacteria	Proteobacteria	Gammaproteobacteria	Oceanospirillales	Endozoicomonadaceae	Endozoicomonas	uncultured bacterium
acc2e528c4a42025e239e473ea82a929	0	0.162651	0	0	0.578313	1.31928	0.289157	0.439759	0	0.789157	Bacteria	Proteobacteria	Alphaproteobacteria	SAR11 clade	Clade I	Clade Ia	Unassigned
ace029739784a4d7129b0712b8a97522	0	0	0	0	0	0.0542169	0	0	0	0	Bacteria	Proteobacteria	Alphaproteobacteria	Sphingomonadales	Sphingomonadaceae	Sphingomonas	Unassigned
acff959e0c2ac045320c35834dae8f12	0	0	0	0	0	0	0	0.26506	0	0	Bacteria	Bacteroidetes	Bacteroidia	Bacteroidales	Marinifilaceae	Marinifilum	uncultured bacterium
ad027728c27c1371736626d754797285	0	0	0.0180723	0	0	0	0	0	0	0	Bacteria	Firmicutes	Clostridia	Clostridiales	Clostridiaceae 4	Paramaledivibacter	uncultured bacterium
ad7aa822311c586aee631d4b8550b76a	0	0	0	0.0662651	0	0	0	0	0	0	Bacteria	Bacteroidetes	Bacteroidia	Flavobacteriales	Flavobacteriaceae	Flavobacterium	Unassigned
ada6ac36dbf1c71cc15a35f269f42702	0.060241	0	0	0	0	0	0	0	0	0	Bacteria	Actinobacteria	Acidimicrobiia	Microtrichales	Ilumatobacteraceae	CL500-29 marine group	uncultured bacterium
adf16714257a52a3247001e19a4e517b	0	0	0.0421687	0	0	0	0	0	0	0	Bacteria	Firmicutes	Clostridia	Clostridiales	Ruminococcaceae	uncultured	Unassigned
ae1c436bdf0a57dc1119a48e680f8111	0.0060241	0	0	0	0	0	0	0	0	0	Bacteria	Proteobacteria	Gammaproteobacteria	Betaproteobacteriales	Unassigned	Unassigned	Unassigned
ae4b433f2f731248d4cb394042d76225	0	0	0	0	0	0	0	0	0	0.0240964	Bacteria	Proteobacteria	Deltaproteobacteria	PB19	uncultured bacterium	uncultured bacterium	uncultured bacterium
ae753f339c500c72f81353b9dbbafb82	0.246988	0	0	0	0	0	0	0	0	0	Bacteria	Actinobacteria	Actinobacteria	Micrococcales	Microbacteriaceae	Microbacterium	Unassigned
aea501e75cbb58a2281f0e515d71caf0	0	0	0.0481928	0	0	0	0	0	0	0	Bacteria	Bacteroidetes	Bacteroidia	Cytophagales	Cyclobacteriaceae	uncultured	uncultured bacterium
af3c12891f15c9600b8079b269af26e4	0	0	0	0	0	0	0	0.26506	0	0	Bacteria	Proteobacteria	Alphaproteobacteria	SAR11 clade	Clade I	Clade Ia	Unassigned
af616d614219136e1ee708d389bf0c3d	0	0	0	0	0.0542169	0	0	0	0	0	Bacteria	Proteobacteria	Gammaproteobacteria	Pseudomonadales	Moraxellaceae	Acinetobacter	Unassigned
af9b25a555ceee821278d324e477424a	0	0	0	0	0	0.421687	0.144578	0.204819	0	0	Bacteria	Proteobacteria	Gammaproteobacteria	SAR86 clade	uncultured bacterium	uncultured bacterium	uncultured bacterium
afa707e07bac05c7a606fdf83604debb	0.325301	0	0	0	0	0	0	0	0	0	Bacteria	Proteobacteria	Gammaproteobacteria	Xanthomonadales	Xanthomonadaceae	Pseudoxanthomonas	Unassigned
aff2a1d055a48aeea4e4579c2c1e6215	0.216867	0.060241	0	0.210843	0.216867	1.39157	0.433735	0.536145	0.0843373	1.45181	Bacteria	Proteobacteria	Gammaproteobacteria	Oceanospirillales	Litoricolaceae	Litoricola	Unassigned
b00b2c6f546e65a5828af624d48feaf8	0.831325	0	0	0	0	0	0	0	0	0	Bacteria	Firmicutes	Bacilli	Bacillales	Bacillaceae	Bacillus	Unassigned
b0733b39a1192da7a7836620164aa2f7	0.060241	0	0	0	0	0	0	0	0	0	Bacteria	Proteobacteria	Alphaproteobacteria	Sphingomonadales	Sphingomonadaceae	Novosphingobium	Unassigned
b0f418a5639ff0f16e002a3113bc7f1c	0	0	0	0	0	0	0	0	0.0843373	0	Bacteria	Actinobacteria	Actinobacteria	Micrococcales	Micrococcaceae	Arthrobacter	Unassigned
b182c6c42f143c019fcf7fa137a7daf6	0.198795	0	0	0.210843	0	0.403614	0.192771	0.198795	0.0722892	0.506024	Bacteria	Bacteroidetes	Bacteroidia	Flavobacteriales	Flavobacteriaceae	NS5 marine group	Unassigned
b186f423d89fd1e084e6ce5ea73bead9	0	0	0	0.0481928	0	0	0	0	0	0	Bacteria	Proteobacteria	Gammaproteobacteria	Alteromonadales	Pseudoalteromonadaceae	Algicola	Unassigned
b1e95a802b02b4c4c959601fb0025ba0	0	0	0	0	0	0.0120482	0	0	0	0	Bacteria	Proteobacteria	Gammaproteobacteria	Oceanospirillales	Litoricolaceae	Litoricola	Unassigned
b2f2cd92ce73d014a2601f26c52baf2f	0	0.5	0	0	0	0	0	0	0	0	Bacteria	Proteobacteria	Gammaproteobacteria	Vibrionales	Vibrionaceae	Unassigned	Unassigned
b2f4b20762adb5c9abf7a4a479bfd3d9	0	0	0	0	0	0.0180723	0	0	0	0	Bacteria	Bacteroidetes	Bacteroidia	Flavobacteriales	Flavobacteriaceae	Unassigned	Unassigned
b322500660fd19f01e79ed91668ae7c2	0	0	0	0	0	0.0120482	0	0	0	0	Bacteria	Bacteroidetes	Bacteroidia	Flavobacteriales	Flavobacteriaceae	NS5 marine group	Unassigned
b33247509f14e52b93a6791c3d81e31e	0	0	0	0	0	0	0	0	0	0.060241	Bacteria	Proteobacteria	Deltaproteobacteria	SAR324 clade(Marine group B)	uncultured bacterium	uncultured bacterium	uncultured bacterium
b3970b083aa41f78692e79839dcb115a	0.0240964	0	0	0	0	0	0	0	0	0	Bacteria	Actinobacteria	Actinobacteria	Micrococcales	Demequinaceae	Demequina	Unassigned
b3bc026ffadc1d46064c71501978634a	0	0	0	0	0	0	0.0662651	0	0	0	Bacteria	Proteobacteria	Gammaproteobacteria	Vibrionales	Vibrionaceae	Grimontia	Unassigned
b3c02cca394da467ae5148b198857f11	0	0	0	0	0	0.0240964	0	0	0	0	Bacteria	Bacteroidetes	Bacteroidia	Chitinophagales	Saprospiraceae	Unassigned	Unassigned
b400fb2461d3fbfcddc3edd4f8291e4c	0	0	0	0.0783133	0	0	0	0	0	0	Bacteria	Actinobacteria	Actinobacteria	Frankiales	Geodermatophilaceae	Geodermatophilus	Unassigned
b42fa403f3f42d1218c9c149b93bb486	0	0	0	0	0	0	0.0722892	0	0	0	Bacteria	Bacteroidetes	Bacteroidia	Flavobacteriales	Flavobacteriaceae	Unassigned	Unassigned
b4385b72b1be574f88d140755a12985a	0.0361446	0	0	0	0	0	0	0	0	0	Bacteria	Proteobacteria	Alphaproteobacteria	uncultured	Unassigned	Unassigned	Unassigned
b440f23de1e222fce59b9f582fbaddfe	0	0	0	0.0542169	0	0	0	0.114458	0	0	Bacteria	Proteobacteria	Gammaproteobacteria	Oceanospirillales	Halomonadaceae	Halomonas	Unassigned
b44ef32e7acc9760956090a648baae64	0	0	0	0	0	0	0	0	0	0.126506	Bacteria	Proteobacteria	Alphaproteobacteria	Rhizobiales	Rhizobiales Incertae Sedis	Dichotomicrobium	uncultured organism
b45809deb76d72796daf0387ce152365	0.060241	0	0	0	0	0	0	0	0	0	Bacteria	Spirochaetes	Spirochaetia	Spirochaetales	Spirochaetaceae	Spirochaeta 2	uncultured organism
b4a4f09e56d353886fafffb9f2338b58	0	0	0	0	0	0.0120482	0	0	0	0	Bacteria	Proteobacteria	Alphaproteobacteria	Thalassobaculales	uncultured	Unassigned	Unassigned
b4c0cb7a6fbc21037981755aa693af3a	0	0	0	0	0	0	0	0.355422	0	0	Bacteria	Proteobacteria	Gammaproteobacteria	Vibrionales	Vibrionaceae	Photobacterium	Unassigned
b4efc8d9cfad53ae7b88f1e275e8b435	0	0.192771	0.36747	0	0	0	0	0	0	0	Bacteria	Proteobacteria	Deltaproteobacteria	Desulfovibrionales	Desulfovibrionaceae	Halodesulfovibrio	Unassigned
b4ffc3984125b4c3493188e475ff72d2	0	0.0120482	0	0	0	0	0	0	0	0	Bacteria	Bacteroidetes	Bacteroidia	Flavobacteriales	NS9 marine group	Unassigned	Unassigned
b5282016019c927370261be717ad91d8	0.26506	0	0.0361446	0	0	0	0	0	0	0	Bacteria	Proteobacteria	Deltaproteobacteria	Desulfovibrionales	Desulfovibrionaceae	Desulfovibrio	Unassigned
b570578289eb6a71c2dcf0d26d96bf07	0	0	0	0.319277	0	0	0	0	0	0	Bacteria	Firmicutes	Bacilli	Bacillales	Staphylococcaceae	Staphylococcus	uncultured bacterium
b579ab4586bb2183a24cf8c63254b840	0	0	0	0	0	0.0120482	0	0	0	0	Bacteria	Proteobacteria	Gammaproteobacteria	Nitrosococcales	Nitrosococcaceae	wb1-P19	uncultured bacterium
b64f12e71238650c2ca23bac8f9ac884	0	0	0	0	0	0	0.0963855	0	0	0.144578	Bacteria	Proteobacteria	Alphaproteobacteria	SAR11 clade	Clade III	Unassigned	Unassigned
b66aae65484751952d76e303c9152924	0	0	0	0	0	0	0	0	0	0.0240964	Bacteria	Proteobacteria	Gammaproteobacteria	Oceanospirillales	Pseudohongiellaceae	Pseudohongiella	Unassigned
b69981c4d225c8fc4db2215082fa4dd5	0	0	0	0	0	0	0	0.060241	0	0	Bacteria	Proteobacteria	Gammaproteobacteria	Unassigned	Unassigned	Unassigned	Unassigned
b6a035da82324268ee2c1a18487857c0	0	0	0	0	0	0.373494	0.0421687	0	0.0963855	0.120482	Bacteria	Cyanobacteria	Oxyphotobacteria	Synechococcales	Cyanobiaceae	Prochlorococcus MIT9313	uncultured bacterium
b6b126bbf6afe50473ab8d51b65a300c	0	0	0	0	0	0.0180723	0	0	0	0	Bacteria	Proteobacteria	Deltaproteobacteria	Oligoflexales	Oligoflexaceae	uncultured	Unassigned
b6bdc11802dc0742d1b7f5c3327f5e1d	0	0.0180723	0	0	0	0	0	0	0	0	Bacteria	Chlamydiae	Chlamydiae	Chlamydiales	Parachlamydiaceae	Unassigned	Unassigned
b6e68b2ad074e7d80d9eab3900d56ab6	0.126506	0	0	0	0	0	0	0	0	0	Bacteria	Firmicutes	Bacilli	Lactobacillales	Streptococcaceae	Streptococcus	Unassigned
b76a8864d19bf4d628b33885445034eb	0	0	0	0	0	0	0	0	0	0.13253	Bacteria	Proteobacteria	Alphaproteobacteria	Rickettsiales	S25-593	uncultured bacterium	uncultured bacterium
b795225dc99876bf0ef7794b1ad8ed6e	0	0	0	0	0	0.0421687	0	0	0	0	Bacteria	Cyanobacteria	Melainabacteria	Caenarcaniphilales	Unassigned	Unassigned	Unassigned
b7d6c81e656a39c36a0cdcaf05e0cc46	0	0	0.915663	0	0	0	0	0	0	0	Bacteria	Bacteroidetes	Ignavibacteria	Ignavibacteriales	Melioribacteraceae	Unassigned	Unassigned
b85483ba9a77a37568cf167dcb5b99be	0	0	0	0	0.0481928	0	0	0	0	0	Bacteria	Proteobacteria	Gammaproteobacteria	Betaproteobacteriales	Burkholderiaceae	Massilia	Unassigned
b85e7261bd4573009ad4cf0b9169b9a4	0	0	0	0	0	0.0120482	0	0	0	0	Bacteria	Proteobacteria	Alphaproteobacteria	SAR11 clade	Clade III	Unassigned	Unassigned
b881a4e8a78f8a61079c75526b68e2b5	0	0	0	0	0	0.0180723	0	0	0	0	Bacteria	Cyanobacteria	Oxyphotobacteria	Eurycoccales	Unassigned	Unassigned	Unassigned
b8e0b0239cc6b67b43501b3d53916c4e	0	0	0	0	0	0	0	0.138554	0	0	Bacteria	Proteobacteria	Alphaproteobacteria	Rhodobacterales	Rhodobacteraceae	Paracoccus	Unassigned
b8e26c6751cf3ad81b54167f630f2922	0	0	0.0060241	0	0	0	0	0	0	0	Bacteria	Proteobacteria	Alphaproteobacteria	Rickettsiales	Unassigned	Unassigned	Unassigned
b9009d26443e3041c6030e8da3fa140d	0	0	0	0	0	0.0361446	0	0	0	0	Bacteria	Proteobacteria	Gammaproteobacteria	Cellvibrionales	Spongiibacteraceae	Spongiibacter	Unassigned
b949bdfbc3a8c46d9f421cc08c278ee5	0	0	0	0	0.114458	0	0	0	0	0	Bacteria	Chlamydiae	Chlamydiae	Chlamydiales	Parachlamydiaceae	Unassigned	Unassigned
b98536138b974cc47ba2ff59f59ba2a6	0	0	0	0	0	0.0240964	0	0	0	0	Bacteria	Proteobacteria	Gammaproteobacteria	Betaproteobacteriales	Methylophilaceae	OM43 clade	Unassigned
b9c8244b6a156d6e73ddcc2f780b9f7a	0	0.144578	0	0	0	0	0	0	0	0	Bacteria	Bacteroidetes	Bacteroidia	Flavobacteriales	Flavobacteriaceae	Tenacibaculum	Unassigned
b9d5aa629b5911e99cca9fe5a5a774f1	0	0	0	0	0	0.0180723	0	0	0	0	Bacteria	Proteobacteria	Alphaproteobacteria	SAR11 clade	Clade I	Clade Ia	uncultured bacterium
ba749bb3cbd8a5a401ec954ad8cb5a43	0.463855	0	0	0.560241	0.355422	2.78916	1.19277	1.15663	0.536145	3.66867	Bacteria	Proteobacteria	Alphaproteobacteria	SAR11 clade	Clade III	Unassigned	Unassigned
bab961d0d57346ca3896a952f710340f	0	0	0	0	0	0	0.0662651	0	0	0	Bacteria	Proteobacteria	Gammaproteobacteria	Pseudomonadales	Moraxellaceae	Acinetobacter	Unassigned
bafe3d491094483d7fc156833e23196a	0	0	0	0	0	0.0301205	0	0	0	0	Bacteria	Bacteroidetes	Bacteroidia	Flavobacteriales	Flavobacteriaceae	NS5 marine group	Unassigned
baffde4cb0664470db6534bc34f9b9f4	0	0	0	0	0	0	0.0060241	0	0	0	Bacteria	Proteobacteria	Deltaproteobacteria	Bdellovibrionales	Bdellovibrionaceae	OM27 clade	Unassigned
bb08a5c0f3f28ae139ccaf617b024891	0	0	0	0	0	0	0	0	0.0120482	0	Bacteria	Proteobacteria	Alphaproteobacteria	Acetobacterales	Acetobacteraceae	Roseomonas	Unassigned
bb632418aa1b565fa8a12119ec7a7a33	0	0	0	0.0120482	0	0	0	0	0	0	Bacteria	Epsilonbacteraeota	Campylobacteria	Campylobacterales	Arcobacteraceae	Arcobacter	uncultured bacterium
bb77ea0fd2fe11a4dd9889fbffd9f665	0.0240964	0	0	0	0	0	0	0	0	0	Bacteria	Bacteroidetes	Bacteroidia	Flavobacteriales	Flavobacteriaceae	Tenacibaculum	Unassigned
bb998339ac172975094e3843524f4448	0	0	0	0	0	0	0	0	0	0.13253	Bacteria	Proteobacteria	Gammaproteobacteria	Vibrionales	Vibrionaceae	Vibrio	Unassigned
bbb258fe746da3c4f5c2a153050512e7	0.26506	0	0.0240964	4.5241	0	0	0	0	0	0	Bacteria	Epsilonbacteraeota	Campylobacteria	Campylobacterales	Unassigned	Unassigned	Unassigned
bbda4001fca2e742316cbd88ada392fa	0	0	0	0	0	0.0120482	0	0	0	0	Bacteria	Planctomycetes	Planctomycetacia	uncultured	uncultured bacterium	uncultured bacterium	uncultured bacterium
bbf8e00e86bafe5c1d648f770e33f078	0	0	0	0	0	0	0	0	0	0.0120482	Bacteria	Epsilonbacteraeota	Campylobacteria	Campylobacterales	Thiovulaceae	Sulfurimonas	uncultured bacterium
bc5263cefe47fc17724324b5b0943e10	0	0	0	0	0	0.0180723	0	0	0	0	Bacteria	Proteobacteria	Gammaproteobacteria	Oceanospirillales	Pseudohongiellaceae	Pseudohongiella	Unassigned
bc5d4f4cda236a7ea0ff1d4bd5652e15	0.0240964	0	0	0	0	0	0	0	0	0	Bacteria	Actinobacteria	Actinobacteria	Micrococcales	Dermabacteraceae	Brachybacterium	Unassigned
bc68580f7a0e0cc8b504bb0d417f6f72	0	0	0	0	0	0.0120482	0	0	0	0	Bacteria	Proteobacteria	Alphaproteobacteria	Rhodobacterales	Rhodobacteraceae	HIMB11	Unassigned
bce0a9f8540d36905f6d458f28d98bb5	0	0	0	0	0	0.0421687	0	0	0	0	Bacteria	Bacteroidetes	Bacteroidia	Flavobacteriales	NS9 marine group	Unassigned	Unassigned
bcf61a466b03468a0930e4a665ee8170	0	0	0	0	0	0.0120482	0	0	0	0	Bacteria	Bacteroidetes	Bacteroidia	Flavobacteriales	Flavobacteriaceae	NS5 marine group	uncultured Flavobacteriaceae bacterium
bd2e74833a22de88b02e7fd6c8b0b67a	0	0.150602	0	0.174699	0	0.295181	0.0783133	0.512048	0.13253	0.46988	Bacteria	Bacteroidetes	Bacteroidia	Flavobacteriales	Flavobacteriaceae	NS5 marine group	uncultured Flavobacteriaceae bacterium
bd508d5066ebc15dd45cedab7a0d1923	0.259036	0	0	0	0	0.403614	0	0	0	0.512048	Bacteria	Bacteroidetes	Bacteroidia	Flavobacteriales	NS9 marine group	uncultured bacterium	uncultured bacterium
bdd1b3d2c81aaa03853354a2472210eb	0	0	0	0	0	0.0120482	0	0	0	0	Bacteria	Bacteroidetes	Bacteroidia	Flavobacteriales	NS9 marine group	uncultured bacterium	uncultured bacterium
bdd2c15502391922217326388f349a35	0	0	0	0	0	0	0.0301205	0	0	0	Bacteria	Planctomycetes	vadinHA49	uncultured organism	uncultured organism	uncultured organism	uncultured organism
be45aa4b24fad13959592236dd7b4bc3	0	0	0	0	0	0.0180723	0	0	0	0	Bacteria	Proteobacteria	Gammaproteobacteria	SAR86 clade	Unassigned	Unassigned	Unassigned
bf1ae997939b8752a0b060304553ed93	0.0240964	0	0	0	0	0	0	0	0	0	Bacteria	Acidobacteria	Thermoanaerobaculia	Thermoanaerobaculales	Thermoanaerobaculaceae	Subgroup 10	uncultured bacterium
bf57c63b4b673f2d74bf47777276e5bd	0	0.0240964	0	0	0	0	0	0	0	0	Bacteria	Bacteroidetes	Bacteroidia	Flavobacteriales	Flavobacteriaceae	Unassigned	Unassigned
bfd1543819ec25b2d7a0f0243b337ad1	0	0	0	0.120482	0	0.0542169	0	0	0	0.114458	Bacteria	Proteobacteria	Gammaproteobacteria	SAR86 clade	Unassigned	Unassigned	Unassigned
c03f5b8e55a2cddcb650bfb7a92cbb83	0	0	0.0060241	0.0361446	0	0.13253	0	0	0	0	Bacteria	Proteobacteria	Gammaproteobacteria	SAR86 clade	uncultured bacterium	uncultured bacterium	uncultured bacterium
c107533ab5cdc90814b0ff4b8f93f241	0	0	0	0	0.10241	0	0	0	0	0	Bacteria	Bacteroidetes	Bacteroidia	Bacteroidales	Bacteroidaceae	Bacteroides	uncultured bacterium
c13034e52529a980e069031a846c59a9	0	0	0	0	0	0	0.0722892	0	0	0	Bacteria	Proteobacteria	Gammaproteobacteria	Pseudomonadales	Pseudomonadaceae	Pseudomonas	Unassigned
c16c10951f174ff62a2aa93886111eed	0	0	0	0	0	0	0	0.138554	0	0	Bacteria	Bacteroidetes	Bacteroidia	Flavobacteriales	Weeksellaceae	Cloacibacterium	uncultured bacterium
c1aee876fbe9570d71fbeef1969a9122	0	0	0	0	0.126506	0	0	0	0	0	Bacteria	Proteobacteria	Gammaproteobacteria	Oceanospirillales	Pseudohongiellaceae	Pseudohongiella	Unassigned
c1e0a591d71e005e9f60ee1dcd9b2c03	0	0	0	0	0.0542169	0	0.0180723	0	0	0	Bacteria	Proteobacteria	Alphaproteobacteria	Caulobacterales	Caulobacteraceae	Brevundimonas	Unassigned
c24a44b59fb7719954b2df2c7883ce4a	0	0	0	0	0	0	0.0361446	0	0	0	Bacteria	Chloroflexi	Anaerolineae	Anaerolineales	Anaerolineaceae	uncultured	uncultured bacterium
c261e58d783c74f2b27e4445682096d3	0	0	0	0	0	0.0180723	0	0	0	0	Bacteria	Actinobacteria	Acidimicrobiia	Actinomarinales	Actinomarinaceae	Candidatus Actinomarina	Unassigned
c263728fef6ca744b85578345d781fcf	0	0	0.0481928	0	0	0	0	0	0	0	Bacteria	Proteobacteria	Gammaproteobacteria	Alteromonadales	Colwelliaceae	Thalassotalea	Unassigned
c274c413b0e3a127f1248d876e0fa699	0	0	0	0	0.313253	0	0	0	0	0	Bacteria	Dependentiae	Babeliae	Babeliales	uncultured bacterium	uncultured bacterium	uncultured bacterium
c2ae0d2f3beb613fb7b5b57084adf7a5	1.50602	0.246988	0.0783133	0.584337	1.15663	1.42169	1.06627	1.33133	0.337349	2.76506	Bacteria	Bacteroidetes	Bacteroidia	Flavobacteriales	Flavobacteriaceae	NS5 marine group	Unassigned
c2d5cdc4e33e516e8331de6c2908666c	0	0	0	0	0.0722892	0	0	0	0	0	Bacteria	Actinobacteria	Actinobacteria	Actinomycetales	Actinomycetaceae	Actinomyces	Unassigned
c347ecf3ccc0f881308de3574236900e	0	0	0.0060241	0	0	0	0	0	0	0	Bacteria	Bacteroidetes	Bacteroidia	Flavobacteriales	Flavobacteriaceae	Ulvibacter	Unassigned
c41b02db1af4ebd92910a4a1bb10f624	0	0	0	0	0	0.0120482	0	0	0	0	Bacteria	Proteobacteria	Deltaproteobacteria	Myxococcales	Nannocystaceae	Unassigned	Unassigned
c4543259cb7b008e3c3e8315d5878b5e	0	0	0	0	0	0	0	0	0.0301205	0	Bacteria	Proteobacteria	Gammaproteobacteria	Pseudomonadales	Moraxellaceae	Enhydrobacter	Unassigned
c48b7b40426b244349e9cbd4426aee8d	0.63253	0	0	0	0.295181	1.37952	0.222892	0.493976	0	1.74096	Bacteria	Proteobacteria	Alphaproteobacteria	Puniceispirillales	SAR116 clade	uncultured bacterium	uncultured bacterium
c57a4ca41940e78ee2ff3a7455fe60a7	0	0	0.240964	0	0	0	0	0	0	0	Bacteria	Proteobacteria	Gammaproteobacteria	Vibrionales	Vibrionaceae	Vibrio	Vibrio parahaemolyticus
c59469ac9daac8f41543f36604569d25	0	0	0	0	0	0	0.0903614	0	0	0	Bacteria	Proteobacteria	Gammaproteobacteria	Coxiellales	Coxiellaceae	Coxiella	uncultured bacterium
c5b3b36aeda8ba51aa5e55249422433c	0	0	0	0	0	0	0	0.0361446	0.0361446	0	Bacteria	Firmicutes	Bacilli	Lactobacillales	Streptococcaceae	Streptococcus	uncultured bacterium
c5dcfe29cc717047d4ed1a5d2a708e50	0	0	0	0	0	0	0	0	0	0.0843373	Bacteria	Proteobacteria	Gammaproteobacteria	Oceanospirillales	Endozoicomonadaceae	Endozoicomonas	uncultured bacterium
c5f18b6cc669c23980264526d985c1a3	0.108434	0.0421687	0	0	0	0	0.180723	0	0	0	Bacteria	Proteobacteria	Gammaproteobacteria	Pseudomonadales	Moraxellaceae	Acinetobacter	Unassigned
c60eab180e4378bc50c58caefb64b175	0	0	0	0	0	0.144578	0	0.222892	0	0.608434	Bacteria	Proteobacteria	Alphaproteobacteria	Puniceispirillales	SAR116 clade	uncultured bacterium	uncultured bacterium
c62f61734a466a04b2b10776e114ad15	0	0	0	0	0.114458	0	0	0	0	0	Bacteria	Proteobacteria	Alphaproteobacteria	SAR11 clade	Clade II	uncultured bacterium	uncultured bacterium
c6459e22466ad578f940d88c82edad65	0	0	0.0361446	0	0	0	0	0	0	0	Bacteria	Proteobacteria	Alphaproteobacteria	Thalassobaculales	uncultured	Unassigned	Unassigned
c65343fbfa966a7ec478774e617ac3f3	0.0481928	0	0	0	0	0	0	0	0	0	Bacteria	Actinobacteria	Acidimicrobiia	Microtrichales	Microtrichaceae	IMCC26207	uncultured bacterium
c6584e2ec174446e8538e8b89345d7ba	0	0	0	0	0	0.0180723	0	0	0	0	Bacteria	Bacteroidetes	Bacteroidia	Flavobacteriales	Flavobacteriaceae	NS5 marine group	Unassigned
c6ab3fcebaac4e3c7475ba2edcb18470	0	0	0	0	0	0.0120482	0	0	0	0	Bacteria	Proteobacteria	Alphaproteobacteria	Rhodobacterales	Rhodobacteraceae	HIMB11	uncultured bacterium
c71357bc5ee7ed762958cf9366d250e6	0	0	0	0	0	0.0361446	0	0	0	0	Bacteria	Proteobacteria	Alphaproteobacteria	Puniceispirillales	SAR116 clade	Unassigned	Unassigned
c751502e5e5fbb0260c2165db9423b98	0	0	0	0	0	0.0722892	0.0542169	0.210843	0	0.198795	Bacteria	Bacteroidetes	Bacteroidia	Flavobacteriales	Flavobacteriaceae	NS4 marine group	Unassigned
c7b06eb2b21f1bcfd05dd11cfe219b61	0.162651	0	0	0.0783133	0	0.746988	0	0.253012	0	0.39759	Bacteria	Proteobacteria	Gammaproteobacteria	Betaproteobacteriales	Methylophilaceae	OM43 clade	Unassigned
c7e136040de2248b48b63ed95424cac6	0.060241	0	0	0	0	0	0	0	0	0	Bacteria	Actinobacteria	Actinobacteria	Bifidobacteriales	Bifidobacteriaceae	Bifidobacterium	Unassigned
c7e76e25fe2861b64383713f1097b819	0.0481928	0	0	0	0.120482	0.13253	0.114458	0	0	0.849398	Bacteria	Proteobacteria	Alphaproteobacteria	Puniceispirillales	SAR116 clade	Unassigned	Unassigned
c7eed1f6457f219636a0983ba4d36fde	0	0.180723	0	0	0	0	0	0	0	0	Bacteria	Proteobacteria	Gammaproteobacteria	Oceanospirillales	Nitrincolaceae	Unassigned	Unassigned
c813f28fb50a14b1a0fe6589da8591a6	0	0	0	0	0	0.150602	0.0542169	0	0	0	Bacteria	Proteobacteria	Alphaproteobacteria	Rhodospirillales	AEGEAN-169 marine group	uncultured bacterium	uncultured bacterium
c8544d26be6b6d15707b2e4cb093181c	0	0	0	0.0180723	0	0	0	0	0	0	Bacteria	Actinobacteria	Actinobacteria	Micrococcales	Micrococcaceae	Kocuria	Unassigned
c85fd44c7a218c726f52a9fc373930af	0	0	0	0	0	0	0	0.0903614	0	0	Bacteria	Bacteroidetes	Bacteroidia	Flavobacteriales	Flavobacteriaceae	NS5 marine group	Unassigned
c87ef65e18ff8bac031af5290b4fda4e	0	0	0	0.0542169	0	0	0	0	0	0	Bacteria	Gemmatimonadetes	BD2-11 terrestrial group	Unassigned	Unassigned	Unassigned	Unassigned
c8b307d09ccad5cf02ce51a935f2c6b7	0	0	0	0	0.060241	0	0	0	0	0	Bacteria	Proteobacteria	Gammaproteobacteria	Alteromonadales	Alteromonadaceae	Rheinheimera	Unassigned
c8e18d225bbbb39bc23a127155490655	0	0	0	0	0	0.0120482	0	0	0	0	Bacteria	Proteobacteria	Alphaproteobacteria	Puniceispirillales	SAR116 clade	Unassigned	Unassigned
c91272f1c71cbf7adbcfd665f9dd1e68	0.0180723	0	0	0	0	0	0	0	0	0	Bacteria	Patescibacteria	Parcubacteria	uncultured bacterium	uncultured bacterium	uncultured bacterium	uncultured bacterium
c92988288b35dc93b3ba76798eda5d57	0	0	0	0	0	0.0120482	0	0	0	0	Bacteria	Proteobacteria	Alphaproteobacteria	SAR11 clade	Clade I	Clade Ia	uncultured bacterium
c983403dbace9f4f88f6c8f46445ed2a	0	0	0	0	0	0.0120482	0	0	0	0	Archaea	Euryarchaeota	Thermoplasmata	Marine Group II	Unassigned	Unassigned	Unassigned
c9c3e5fc57c14801ee23757733a6388a	0	0	0	0	0	0.0180723	0	0	0	0	Bacteria	Bacteroidetes	Bacteroidia	Flavobacteriales	Flavobacteriaceae	NS4 marine group	Unassigned
c9eb9e107680e9e1ad1ef165c61f5d26	0	0.493976	0	0	0	0	0	0	0	0	Bacteria	Proteobacteria	Gammaproteobacteria	Oceanospirillales	Saccharospirillaceae	Thalassolituus	Unassigned
ca1a7bc36998bb3cdce432a30f5e4a8a	0	0.0301205	0	0	0	0	0	0	0	0	Bacteria	Bacteroidetes	Bacteroidia	Chitinophagales	uncultured	Unassigned	Unassigned
ca23ab618d5553a30324a89b10de24b5	0	0	0	0	0.10241	0	0	0	0	0	Bacteria	Patescibacteria	ABY1	Candidatus Falkowbacteria	uncultured bacterium	uncultured bacterium	uncultured bacterium
ca94f16aad3dd90adc44d6ff8ef47e48	0.0301205	0	0	0	0	0	0	0	0	0	Bacteria	Firmicutes	Bacilli	Bacillales	Paenibacillaceae	Paenibacillus	Unassigned
cacf5050b965074ecffc4cd46ed379c1	0.240964	0	0	0	0	0	0	0	0	0	Bacteria	Bacteroidetes	Bacteroidia	Flavobacteriales	Weeksellaceae	Cloacibacterium	uncultured bacterium
cafcbe473cd72548326324d68c830337	0	0	0	0	0	0.0481928	0	0	0	0	Bacteria	Bacteroidetes	Bacteroidia	Bacteroidales	Marinifilaceae	Marinifilum	uncultured bacterium
cbbf165a84c7825641b1212917714d88	0	0	0.289157	0	0	0	0	0	0	0	Bacteria	Firmicutes	Clostridia	Clostridiales	Clostridiaceae 1	Unassigned	Unassigned
cbc9a4baf7c45f801488a1b9f9278867	0	0	0	0	0	0	0	0	0.0301205	0	Bacteria	Chlamydiae	Chlamydiae	Chlamydiales	Parachlamydiaceae	Unassigned	Unassigned
cc196cc9c0adb5e25782bcaab9c3d42c	0	0	0	0	0	0	0	0	0	0.0240964	Bacteria	Planctomycetes	Pla4 lineage	Unassigned	Unassigned	Unassigned	Unassigned
cc2801cfbf17a0dc0d3dc7dfceb10a1d	0	0	0	0	0	0	0.0361446	0	0	0	Bacteria	Spirochaetes	Leptospirae	Leptospirales	Leptospiraceae	Leptospira	Unassigned
cc304c8d259937c5e3e0f34d7468cfc9	0	0.36747	0.0722892	0	0	0	0	0	0	0	Bacteria	Bacteroidetes	Bacteroidia	Flavobacteriales	Weeksellaceae	Unassigned	Unassigned
ccab2bb812b9fdbc5b88f1b2055b8d82	0	0	0	0.0421687	0	0	0	0	0	0	Bacteria	Acidobacteria	Blastocatellia (Subgroup 4)	Blastocatellales	Blastocatellaceae	Blastocatella	uncultured bacterium
cd07437c08f7e135888f396ff5c7b8bc	1.06627	0.710843	2.34337	0	0.156627	0	0	0	0	0	Bacteria	Proteobacteria	Gammaproteobacteria	Vibrionales	Vibrionaceae	Vibrio	Unassigned
cd6186b233833efe6059df486049b19b	0	0	0	0	0	0	0	0	0.0481928	0	Bacteria	Proteobacteria	Gammaproteobacteria	Oceanospirillales	Halomonadaceae	Cobetia	Unassigned
cdbdd438d648f6a8617600eed3bf410f	0	0.0301205	0	0	0	0	0	0	0	0	Bacteria	Proteobacteria	Gammaproteobacteria	Oceanospirillales	Oleiphilaceae	Oleiphilus	Unassigned
cdee706afb41e3f7a89743a1b68cbd99	0	0.0180723	0	0	0	0	0	0	0	0	Bacteria	Proteobacteria	Gammaproteobacteria	Alteromonadales	Shewanellaceae	Ferrimonas	Unassigned
cec9f4c0c1690fe4fb539b086a26c345	0	0	0	0	0.590361	0	0.108434	0.168675	0	0	Bacteria	Proteobacteria	Gammaproteobacteria	Xanthomonadales	Xanthomonadaceae	Stenotrophomonas	Unassigned
cecb258446ab6b04c767032a44fadeed	0.680723	0	0	0	0	0	0	0	0	0	Bacteria	Firmicutes	Bacilli	Lactobacillales	Enterococcaceae	Enterococcus	Unassigned
cf5deb6194a7978f96c6ecb7e3d9b27c	0	0.0120482	0	0	0	0	0	0	0	0	Bacteria	Proteobacteria	Gammaproteobacteria	Alteromonadales	Colwelliaceae	Thalassotalea	Unassigned
cf6c3ed8e1a4e4571c639377b0745562	0	0	0	0	0	0.307229	0	0	0	0.180723	Bacteria	Proteobacteria	Gammaproteobacteria	Cellvibrionales	Halieaceae	OM60(NOR5) clade	uncultured bacterium
cf92d61b013f8d3de96ddaf46c8d8c23	0	0	0	0	0	0.0180723	0	0	0	0	Bacteria	Proteobacteria	Deltaproteobacteria	Oligoflexales	Oligoflexaceae	uncultured	uncultured bacterium
cfecb912dc814381cc0b8c664532e41f	0	0	0	0	0	0.0542169	0	0	0	0	Bacteria	Proteobacteria	Alphaproteobacteria	Rhodobacterales	Rhodobacteraceae	Unassigned	Unassigned
d024467a0c35d2e731871572e11a5ea2	0	0	0.307229	0	0	0	0	0	0	0	Bacteria	Proteobacteria	Gammaproteobacteria	Vibrionales	Vibrionaceae	Vibrio	Unassigned
d03737ff09620ee940ab62f9525905a3	0	0	0.0060241	0	0	0	0	0	0	0	Bacteria	Proteobacteria	Gammaproteobacteria	Betaproteobacteriales	Methylophilaceae	OM43 clade	Unassigned
d082132e6cba447c9d37eeb11e652ffb	0	0	0	0	0	0	0	0.162651	0	0	Bacteria	Proteobacteria	Gammaproteobacteria	Pseudomonadales	Moraxellaceae	Psychrobacter	Unassigned
d09ffeebfc52625a1aa08ab2d031ff66	0.0120482	0	0	0	0	0	0	0	0	0	Bacteria	Proteobacteria	Gammaproteobacteria	Vibrionales	Vibrionaceae	Vibrio	Unassigned
d0beb7aaac345b531b8a3d67a9f81ca0	0.222892	2.24096	1.62651	0	0	0	0	0	0	0	Bacteria	Proteobacteria	Gammaproteobacteria	Vibrionales	Vibrionaceae	Enterovibrio	Unassigned
d0cb96461edaccc13a230486e439c470	0	0	0	0	0	0	0	0	0	0.0180723	Bacteria	Proteobacteria	Alphaproteobacteria	Rickettsiales	Midichloriaceae	Candidatus Midichloria	Unassigned
d13f5373dbfe2eb51a73d89536766e53	0	0	0	0	0	0	0	0	0	0.0301205	Bacteria	Cyanobacteria	Oxyphotobacteria	Nostocales	Phormidiaceae	Trichodesmium IMS101	Unassigned
d14806f151dfc2f033ca0a53c48e346a	0	0	0	0	0	0	0	0	0	0.0180723	Bacteria	Proteobacteria	Deltaproteobacteria	Unassigned	Unassigned	Unassigned	Unassigned
d15aae1ffc6a8980c3738dbc9e51e4bf	0.174699	0	0	0	0	0	0	0	0	0	Bacteria	Actinobacteria	Actinobacteria	Corynebacteriales	Corynebacteriaceae	Corynebacterium	Unassigned
d16078127bbf4dd1180730b85d960658	0	0	0	0	0.0783133	0	0	0	0	0	Bacteria	Proteobacteria	Gammaproteobacteria	Alteromonadales	Shewanellaceae	Shewanella	Unassigned
d194865a04ad525849ebd6e18ffcd038	0.0722892	0.0240964	0	0.144578	0	0	0	0	0	0	Bacteria	Proteobacteria	Gammaproteobacteria	Betaproteobacteriales	Burkholderiaceae	Achromobacter	Unassigned
d197dba98cb9337569ef3b444b9090a7	0	0	0	0	0	0	0	0.138554	0	0	Bacteria	Bacteroidetes	Bacteroidia	Flavobacteriales	Crocinitomicaceae	Crocinitomix	Unassigned
d1d39ffc75559577727d5ff2963581bc	0	0	0	0	0.174699	0	0	0	0	0	Bacteria	Marinimicrobia (SAR406 clade)	uncultured bacterium	uncultured bacterium	uncultured bacterium	uncultured bacterium	uncultured bacterium
d2173074346da9ec15ac832a1a52f9ac	0.0963855	0	0	0	0	0	0	0	0	0	Bacteria	Firmicutes	Clostridia	Clostridiales	Ruminococcaceae	Ruminococcus 1	uncultured bacterium
d31fe84f7b9848e4f08821332a9d598e	0	0	0	0	0	0	0	0.108434	0	0	Bacteria	Proteobacteria	Gammaproteobacteria	Vibrionales	Vibrionaceae	Photobacterium	Unassigned
d3715ade13ddc01ee8cf2afececbb6f6	0.0542169	0	0	0	0	0	0	0	0	0	Bacteria	Proteobacteria	Gammaproteobacteria	Pseudomonadales	Moraxellaceae	Acinetobacter	uncultured bacterium
d39d4b3dae1589b4ab40ce3811944fa5	0	0	0	0	0	0	0	0	0.0421687	0	Bacteria	Unassigned	Unassigned	Unassigned	Unassigned	Unassigned	Unassigned
d3bcb81e254f1a093fe483f23985d10b	7.30723	1.24096	1.68072	0	0.259036	0	0	0	0	0	Bacteria	Proteobacteria	Gammaproteobacteria	Vibrionales	Vibrionaceae	Vibrio	Vibrio parahaemolyticus
d42772c1484ad6cf67acba764ce1f45f	0	0	0	0	0	0.0240964	0	0	0	0	Bacteria	Proteobacteria	Gammaproteobacteria	SAR86 clade	uncultured bacterium	uncultured bacterium	uncultured bacterium
d48cf1e7234285f853edfa0aaa039c03	0	0	0	0.10241	0	0	0	0	0	0	Bacteria	Proteobacteria	Gammaproteobacteria	Xanthomonadales	Xanthomonadaceae	Stenotrophomonas	Unassigned
d49e326d690c9323c91474a321a4b59f	0	0.0662651	0	0	0	0	0	0	0	0	Bacteria	Proteobacteria	Gammaproteobacteria	Alteromonadales	Pseudoalteromonadaceae	Algicola	Unassigned
d556f2089c5e95a56db493ea7d818212	0	0	0	0	0	0	0	0	0	0.0240964	Bacteria	Bacteroidetes	Bacteroidia	Chitinophagales	Saprospiraceae	uncultured	uncultured bacterium
d5e4d5956d17ca4d39e743205ddfab62	0	0	0	0	0.0180723	0	0	0	0	0	Bacteria	Bacteroidetes	Bacteroidia	Flavobacteriales	Unassigned	Unassigned	Unassigned
d5ff109f85174dc3ca9532fa1725cc87	0	0	0	0	0	0	1.70482	0	0	0	Bacteria	Bacteroidetes	Chlorobia	Chlorobiales	Chlorobiaceae	Prosthecochloris	Unassigned
d60fefe85b7b091c4f229d6ba4b1d7f3	0	0	0	0	0	0.10241	0	0	0	0	Bacteria	Proteobacteria	Alphaproteobacteria	Rhodobacterales	Rhodobacteraceae	Unassigned	Unassigned
d65aea00f9c0248def7f92f225258cc6	0	0	0	0	0	0	0	0.120482	0	0	Bacteria	Proteobacteria	Deltaproteobacteria	Oligoflexales	Oligoflexaceae	uncultured	uncultured bacterium
d665dead564a40a3f194fe61017303d4	0	0	0.0722892	0	0	0	0	0	0	0	Bacteria	Firmicutes	Clostridia	Clostridiales	Ruminococcaceae	Ruminococcaceae UCG-012	uncultured organism
d679e96e7a136636500edfdc414422e1	0	0	0	0	0	0	0.0180723	0	0	0	Bacteria	Proteobacteria	Alphaproteobacteria	Unassigned	Unassigned	Unassigned	Unassigned
d68d47171f15107f8ed657b5b39f0496	0.120482	0	0	0	0	0	0	0	0	0	Bacteria	Firmicutes	Bacilli	Bacillales	Family X	Thermicanus	Unassigned
d6ab93f4eccee1dfa309894b1dc67337	0	0	0	0	0	0	0	0	0.0662651	0	Bacteria	Firmicutes	Bacilli	Lactobacillales	Carnobacteriaceae	Granulicatella	uncultured bacterium
d6d48a19435f69accbb96dc43f880b6b	0	0	0	0	0	0	0.0481928	0	0	0	Bacteria	Proteobacteria	Gammaproteobacteria	Pseudomonadales	Pseudomonadaceae	Pseudomonas	Unassigned
d6dab475e181ff6ae84ee623b10cc223	0	0	0	0	0	0	0	0	0	0.0180723	Bacteria	Proteobacteria	Alphaproteobacteria	Unassigned	Unassigned	Unassigned	Unassigned
d71ab97fd90b69e0ef20a6732e762dab	0	0	0	0	0	0	0	0.0722892	0	0	Bacteria	Proteobacteria	Gammaproteobacteria	Pseudomonadales	Pseudomonadaceae	Pseudomonas	Unassigned
d74386ed3463116f9a28809da40ed08a	0	0.10241	0	0.060241	0	0.343373	0	0.108434	0	0.379518	Bacteria	Bacteroidetes	Bacteroidia	Flavobacteriales	NS9 marine group	Unassigned	Unassigned
d75b03fc14e816df28594a4bfc1da95d	0	0	0	0	0.138554	0	0	0	0	0	Bacteria	Firmicutes	Clostridia	Clostridiales	Family XI	Anaerococcus	uncultured bacterium
d75bee44c48868d546f2fb31891fda3a	0	0	0	0	0	0	0	0.373494	0.060241	0	Bacteria	Proteobacteria	Alphaproteobacteria	Rhodovibrionales	Kiloniellaceae	Tistlia	Unassigned
d7a2a6d3d5c67181f1710acaf4e2bc53	0.0903614	0	0	0	0	0	0	0	0	0	Bacteria	Proteobacteria	Deltaproteobacteria	Bdellovibrionales	Bacteriovoracaceae	uncultured	Unassigned
d7cde922505e1dd73674e001c45aa67c	0	0	0	0.0963855	0.0722892	0	0	0.0301205	0	0	Bacteria	Bacteroidetes	Bacteroidia	Cytophagales	Flammeovirgaceae	Flammeovirga	Unassigned
d7f69d1b7e3d59f26729932463883fb6	0	0	0	0	0	0.0120482	0	0	0	0	Bacteria	Bacteroidetes	Bacteroidia	Flavobacteriales	Cryomorphaceae	uncultured	Unassigned
d8210e953b8c92a2d0776a46f0e8c91a	0	0	0	0	0	0	0	0	0.0542169	0	Bacteria	Proteobacteria	Gammaproteobacteria	Vibrionales	Vibrionaceae	Vibrio	Unassigned
d86bbe517af039b3445ba4d93169d060	0	0	0	0	0	0.0180723	0	0	0	0	Bacteria	Bacteroidetes	Bacteroidia	Flavobacteriales	NS9 marine group	uncultured bacterium	uncultured bacterium
d8cbdff09431820caeb3d663eda996dd	0.0963855	0	0	0.0903614	0	0.180723	0	0	0	0.0542169	Bacteria	Bacteroidetes	Bacteroidia	Flavobacteriales	Flavobacteriaceae	uncultured	Unassigned
d929629bccf3945822c214351bda69ae	0	0	0	0	0	0	0.0662651	0	0	0	Bacteria	Proteobacteria	Alphaproteobacteria	Rhodospirillales	Terasakiellaceae	Terasakiella	Unassigned
d94171be5c597009becba3a9db2f49c5	0	0	0.590361	0	0	0	0	0	0	0	Bacteria	Firmicutes	Clostridia	Clostridiales	Unassigned	Unassigned	Unassigned
da0c25ef3ec99e2ce0ff3250297e151b	0	0	0	0	0	0.060241	0	0	0	0	Bacteria	Margulisbacteria	uncultured bacterium	uncultured bacterium	uncultured bacterium	uncultured bacterium	uncultured bacterium
dabf066c2ff5ce27beaca2efb5aff5c8	0.126506	0	0	0	0	0	0	0	0	0	Bacteria	Bacteroidetes	Bacteroidia	Sphingobacteriales	Sphingobacteriaceae	Sphingobacterium	uncultured bacterium
dadff80cb99347e29f902551ced47f84	1.13855	0.927711	0.271084	5.43976	5.45181	0	3.3494	4.44578	7.36747	0.060241	Bacteria	Proteobacteria	Gammaproteobacteria	Pseudomonadales	Pseudomonadaceae	Pseudomonas	Unassigned
dadffe9a008fc67460bd410422fa3fd3	0.409639	0.596386	1.16265	0	0	0	0	0	0	0	Bacteria	Proteobacteria	Deltaproteobacteria	Desulfovibrionales	Desulfovibrionaceae	Halodesulfovibrio	Unassigned
db41efa393bb2f0d31386a5ddbb01eef	0	0	0	0	0	0	0	0.156627	0	0.307229	Bacteria	Proteobacteria	Alphaproteobacteria	Puniceispirillales	SAR116 clade	Unassigned	Unassigned
db4a4deb668c06e7696b2de7b17d18fe	0.0120482	0	0	0	0	0	0	0	0	0	Bacteria	Bacteroidetes	Bacteroidia	Chitinophagales	uncultured	uncultured bacterium	uncultured bacterium
db6ac9b2f1fd80942eb962e1dbfdc105	0	0	0	0	0	0	0	0	0	0.192771	Bacteria	Proteobacteria	Gammaproteobacteria	Oceanospirillales	Halomonadaceae	Halomonas	uncultured Halomonas sp.
db6c08d4181bb39f1e87b8b031553a4b	0	0	0	0	0	0	0	0	0	0.0120482	Bacteria	Bacteroidetes	Bacteroidia	Cytophagales	Cyclobacteriaceae	Unassigned	Unassigned
db786035831a61afed9d09f9f4eab07a	0	0	0	0	0	0	0.0240964	0	0	0	Bacteria	Bacteroidetes	Bacteroidia	Cytophagales	Cyclobacteriaceae	uncultured	Unassigned
db7d526ed762b60b155cbd5a2bd3919f	0	0	0	0	0	0.0180723	0	0	0	0	Bacteria	Proteobacteria	Deltaproteobacteria	Bdellovibrionales	Bacteriovoracaceae	Peredibacter	Unassigned
dba667c4ee090ab626324028f8c150e3	0.439759	0	0	0	0	0.554217	0.180723	0.108434	0.186747	1.08434	Bacteria	Proteobacteria	Alphaproteobacteria	Puniceispirillales	SAR116 clade	Unassigned	Unassigned
dbb610aebb25eb5eea9d9d34bc154771	0	0	0	0	0	0	0.0361446	0	0	0	Bacteria	Proteobacteria	Gammaproteobacteria	Pseudomonadales	Pseudomonadaceae	Pseudomonas	Unassigned
dbe162a838af2bbce93947a8f043004f	0	0	0.10241	0	0	0	0	0	0	0	Bacteria	Spirochaetes	Spirochaetia	Spirochaetales	Spirochaetaceae	Spirochaeta 2	Unassigned
dc23f58346a9dad5ab72fda5044b07aa	0	0	0	0	0.144578	0	0	0	0	0	Bacteria	Proteobacteria	Alphaproteobacteria	Rhodospirillales	Magnetospiraceae	uncultured	uncultured bacterium
dc2dc4e33aa873928bc4b3ddba1eec86	0.0421687	0	0	0	0	0	0	0	0	0	Bacteria	Proteobacteria	Deltaproteobacteria	Bdellovibrionales	Bdellovibrionaceae	OM27 clade	uncultured bacterium
dc7aeb8a3ade7b59c54923c9487d439a	0	0	0	0.120482	0	0	0	0	0	0	Bacteria	Proteobacteria	Deltaproteobacteria	Oligoflexales	Oligoflexaceae	uncultured	uncultured bacterium
dc8794a956571c5bee2836475853a137	0	0	0	0	0	0	0.0662651	0	0	0	Bacteria	Acetothermia	Acetothermiia	uncultured bacterium	uncultured bacterium	uncultured bacterium	uncultured bacterium
dca87229ed701daf6b5d5f7fe7b36321	0	0	0	0	0	0.0180723	0	0	0	0	Bacteria	Proteobacteria	Alphaproteobacteria	Rhodospirillales	AEGEAN-169 marine group	uncultured bacterium	uncultured bacterium
dcaadd78c5028ea8d6f50e9972e74d62	0	0	0	0	0	0	1.22289	0	0	0	Archaea	Diapherotrites	Iainarchaeia	Iainarchaeales	uncultured archaeon	uncultured archaeon	uncultured archaeon
dd0e3e6caeaec2f4f04fe1d3208dc133	0	0	0	0	0	0	0	0.0722892	0	0	Bacteria	Proteobacteria	Gammaproteobacteria	Oceanospirillales	Endozoicomonadaceae	Endozoicomonas	uncultured bacterium
dd15d27a9438ba0c692400e416eead15	0	0	0	0	0	0	0.277108	0	0	0	Bacteria	Proteobacteria	Gammaproteobacteria	Pseudomonadales	Moraxellaceae	Acinetobacter	uncultured bacterium
dd1b74e9cc286f4536a3e375395505a6	0	0	0	0	0	0	0.0963855	0	0	0	Bacteria	Bacteroidetes	Bacteroidia	Bacteroidales	Prolixibacteraceae	Sunxiuqinia	Unassigned
dd418824ac76cd0cdccb1f5edc5f2076	0	0	0	0	0.0421687	0	0	0	0.0361446	0	Bacteria	Proteobacteria	Gammaproteobacteria	Pseudomonadales	Moraxellaceae	Acinetobacter	Unassigned
ddbcee944b03b957d0a33a22f281c0e1	0	0	0	0	0.0120482	0	0	0	0	0	Bacteria	Bacteroidetes	Bacteroidia	Flavobacteriales	Schleiferiaceae	Schleiferia	Unassigned
ddeb406623586f77dc0933a7bcb072b8	0.114458	0	0	0	0	0	0	0	0	0	Bacteria	Proteobacteria	Gammaproteobacteria	Run-SP154	uncultured bacterium	uncultured bacterium	uncultured bacterium
de5e9a0139c9a1c80310451a0b035fd8	0	0	0	0	0.0481928	0.909639	0.180723	0.162651	0	0.710843	Bacteria	Proteobacteria	Alphaproteobacteria	SAR11 clade	Clade II	uncultured bacterium	uncultured bacterium
de6a6e4dc3a9c8e7bb462ad4d9e34e11	0	0	0	0	0	0.0120482	0	0	0	0	Bacteria	Proteobacteria	Alphaproteobacteria	SAR11 clade	Clade III	Unassigned	Unassigned
de922d2d380a2c37c5a990aaffa2b7b0	0	0.0722892	0	0	0	0	0	0	0	0	Bacteria	Bacteroidetes	Bacteroidia	Bacteroidales	Unassigned	Unassigned	Unassigned
de979d3f228403236bc3bd42055b110c	0.295181	0.0361446	0	0.421687	0	0.993976	0.144578	0.156627	0.0843373	0.704819	Bacteria	Bacteroidetes	Bacteroidia	Sphingobacteriales	NS11-12 marine group	Unassigned	Unassigned
de9dc8d0c8f1c6dbef937ac7c4cd462d	0	0	0	0	0	0	0.692771	0	0	0	Bacteria	Proteobacteria	Gammaproteobacteria	Vibrionales	Vibrionaceae	Photobacterium	Unassigned
dea064b6006ba6873ad526b92176e8c6	0.23494	0	0	0.216867	0	0	0	0	0	0	Bacteria	Firmicutes	Bacilli	Bacillales	Family X	Thermicanus	Unassigned
deaf6cb1ce73b58480f70564a9098bca	0	0	0	0	0	0	0	0	2.27711	0	Archaea	Nanoarchaeaeota	Woesearchaeia	Unassigned	Unassigned	Unassigned	Unassigned
deb46787c2051ff0693e3c19f9cd6602	0.331325	0	0	0	0	0	0	0	0	0	Bacteria	Bacteroidetes	Bacteroidia	Flavobacteriales	Cryomorphaceae	uncultured	uncultured bacterium
debf6532bd39d9485da2608a34e98b1c	0	0	0	0	0	0	0	0	0	0.0662651	Bacteria	Bacteroidetes	Bacteroidia	Flavobacteriales	Flavobacteriaceae	uncultured	Unassigned
deca0f2134e101684aa8e6ed94e7a4b6	0	0	0.162651	0	0	0	0	0	0	0	Bacteria	Bacteroidetes	Bacteroidia	Cytophagales	Cyclobacteriaceae	Unassigned	Unassigned
df4cdfd6acf085770826829d361b440b	0	0	0.210843	0	0	0	0	0	0	0	Bacteria	Proteobacteria	Alphaproteobacteria	Rhodovibrionales	Kiloniellaceae	Tistlia	Unassigned
df74065f8aa23c8844e412b4f66bd09e	0	0	0	0	0.0240964	0	0	0	0	0	Bacteria	Spirochaetes	Leptospirae	Leptospirales	Leptospiraceae	Leptospira	Unassigned
df7e0a653758eb60af0eb77f5c9015cc	0	0	0	0	0	0	0.343373	0	0	0	Bacteria	Proteobacteria	Gammaproteobacteria	Vibrionales	Vibrionaceae	Photobacterium	Unassigned
df9c0e867ffc1c67aef0c46350e1aa7d	0.198795	0	0	0	0	0	0.060241	0	0	0	Bacteria	Actinobacteria	Actinobacteria	Micrococcales	Bogoriellaceae	Georgenia	Unassigned
dfa68c3aa31f890a32e02051b9a526f2	0	0	0	0	0	0	0.0421687	0	0	0	Bacteria	Proteobacteria	Deltaproteobacteria	Bdellovibrionales	Bacteriovoracaceae	Peredibacter	Unassigned
e0955fb700080f84fe898b9f53095b56	0	0	0	0	0	0	1.37349	0	0.451807	0	Bacteria	Bacteroidetes	Bacteroidia	Cytophagales	Cyclobacteriaceae	Fabibacter	Unassigned
e0ccdc625f3d349201a6fb3b99975909	0.114458	0	0	0	0.144578	0	0.0783133	0.216867	0.0542169	0	Bacteria	Spirochaetes	Spirochaetia	Spirochaetales	Spirochaetaceae	Spirochaeta 2	uncultured organism
e15ecd6392fe395a11aee7e576bfeafd	0.0120482	0	0	0	0	0	0	0	0	0	Bacteria	Bacteroidetes	Bacteroidia	Chitinophagales	Saprospiraceae	Unassigned	Unassigned
e17a8854b52eb20a6b00a9bb1e0abce2	0	0	0	0	0	0.0722892	0	0	0	0	Bacteria	Proteobacteria	Alphaproteobacteria	Puniceispirillales	SAR116 clade	Unassigned	Unassigned
e17c38aa5b9e418375cc7a38b7081677	0	0	0	0	0	0.506024	0	0.0903614	0	0.144578	Bacteria	Bacteroidetes	Bacteroidia	Flavobacteriales	NS9 marine group	uncultured bacterium	uncultured bacterium
e246ee986ee70fe1beba1fb3bfe40298	0	0	0	0.0481928	0	0	0	0	0	0	Bacteria	Proteobacteria	Alphaproteobacteria	Rhodospirillales	Rhodopirillaceae	Defluviicoccus	Unassigned
e290089914f88d461cd95837345573af	0	0	0	0	0	0.0120482	0	0	0	0	Bacteria	Proteobacteria	Gammaproteobacteria	Chromatiales	Chromatiaceae	Candidatus Thiobios	Unassigned
e2dc3cfaf40b7f7577f5ad250f08f4fd	0	0	0	0	0	0.192771	0	0	0	0	Bacteria	Proteobacteria	Alphaproteobacteria	Parvibaculales	PS1 clade	Unassigned	Unassigned
e2f486f92b8b6fb8ca1b13c2ea0eef50	0.614458	2.77711	0.0722892	0	0.0903614	0	0	0	0	0	Bacteria	Lentisphaerae	Oligosphaeria	P.palmC41	uncultured bacterium	uncultured bacterium	uncultured bacterium
e2f9763c204bcea41788e2d5f15cab00	0	0	0.210843	0	0	0	0	0	0	0	Bacteria	Firmicutes	Clostridia	Clostridiales	Unassigned	Unassigned	Unassigned
e30e86bdb95fbcfa3aeec52d7c23f53a	0.0180723	0	0	0	0.186747	0.174699	0	0	0	0	Bacteria	Bacteroidetes	Bacteroidia	Flavobacteriales	Flavobacteriaceae	NS5 marine group	uncultured bacterium
e3528670b3200caea47a7bb67eccf042	0	0.156627	5.66265	0	0	0	0	0	0	0	Bacteria	Firmicutes	Clostridia	Clostridiales	Clostridiaceae 1	Unassigned	Unassigned
e355a3b16e15acc2857e7fe759645f96	0.0361446	0	0	0	0	0	0	0	0	0	Bacteria	Chloroflexi	Anaerolineae	SBR1031	A4b	Unassigned	Unassigned
e35ed39826421a40ab355042cd93af1a	0	0	0.0060241	0	0	0	0	0	0	0	Bacteria	Bacteroidetes	Bacteroidia	Bacteroidales	Prolixibacteraceae	Roseimarinus	uncultured Bacteroidetes bacterium
e45f49dfb733db6226ee1bc17948cdc9	0	0	0	0	0	0	0.0481928	1.69277	0	0	Bacteria	Proteobacteria	Alphaproteobacteria	Rhodospirillales	Terasakiellaceae	uncultured	uncultured alpha proteobacterium
e499ea52baaa34d45ffcec49990ea502	0	0	0	0	0	0.0120482	0	0	0	0	Bacteria	Proteobacteria	Gammaproteobacteria	Chromatiales	Chromatiaceae	Candidatus Thiobios	Unassigned
e4f333f78d116311d513b796d5dc996e	0	0	0	0	0	0	0.0722892	0	0	0	Bacteria	Actinobacteria	Actinobacteria	Corynebacteriales	Corynebacteriaceae	Corynebacterium 1	uncultured bacterium
e50109509fa8bc5f47873eb42eb0dafa	0	0	0	0	0	0	0.0361446	0	0	0	Bacteria	Proteobacteria	Deltaproteobacteria	SAR324 clade(Marine group B)	Unassigned	Unassigned	Unassigned
e50d79574767bb43de3a55c97e0028bb	0.283133	0	0	0.379518	0	0.716867	0.355422	0.753012	0	1.18675	Bacteria	Proteobacteria	Alphaproteobacteria	Puniceispirillales	SAR116 clade	Unassigned	Unassigned
e5765e85a13171ad1705c2d8e806c134	0	0	0	0	0.150602	0.222892	0.0722892	0	0	0	Bacteria	Proteobacteria	Alphaproteobacteria	Puniceispirillales	SAR116 clade	Unassigned	Unassigned
e57c2e30c70db9b610ca2b1fed1e289a	0	0	0	0	0	0	0	0.0120482	0	0	Bacteria	Bacteroidetes	Bacteroidia	Flavobacteriales	Flavobacteriaceae	Unassigned	Unassigned
e57f4876bee636765aa161486404d5ef	0	0	0	0	0	0	0	0.0783133	0	0	Bacteria	Proteobacteria	Alphaproteobacteria	SAR11 clade	Clade II	uncultured bacterium	uncultured bacterium
e59937ecebb0f1aa71412468c8e4780a	0.126506	0	0	0	0	0	0	0	0	0	Bacteria	Patescibacteria	Gracilibacteria	JGI 0000069-P22	Unassigned	Unassigned	Unassigned
e5c174a778e7f444b16198776cdb0081	0.0240964	0	0	0	0	0	0	0	0	0	Bacteria	Actinobacteria	Actinobacteria	Frankiales	Cryptosporangiaceae	Fodinicola	Unassigned
e655a4b69d03c72adc03ec084f0d23f3	0	0	0	0	0	0.0060241	0	0	0	0	Bacteria	Bacteroidetes	Bacteroidia	Flavobacteriales	NS9 marine group	uncultured bacterium	uncultured bacterium
e713d7830f951a37be18c422a9d24b78	0	0.722892	0.0843373	0	0	0	0	0	0	0	Bacteria	Proteobacteria	Gammaproteobacteria	Vibrionales	Vibrionaceae	Vibrio	Unassigned
e71a009d9be3d72b5fd9a2875da8c1aa	0.0662651	0	0	0	0	0	0	0	0	0	Bacteria	Proteobacteria	Alphaproteobacteria	SAR11 clade	Clade I	Clade Ib	uncultured bacterium
e72b50f24e8c9fb89820e0f3e1b4ac15	0	0	0	0.26506	0.120482	0	0	0	0.0843373	0	Bacteria	Firmicutes	Bacilli	Bacillales	Staphylococcaceae	Staphylococcus	Unassigned
e73eb9f41420e73e5eb493e438a48ddb	0	0	0.114458	0	0	0	0	0	0	0	Bacteria	Proteobacteria	Gammaproteobacteria	Oceanospirillales	Halomonadaceae	Oceanospirillum	Unassigned
e743998f0dc664fdfd73c72f04f373d2	0	0	0	0	0.0120482	0	0	0	0	0	Bacteria	Proteobacteria	Gammaproteobacteria	Alteromonadales	Shewanellaceae	Shewanella	Unassigned
e789d1e0daa2f58460885aa6599417c7	0	0	0	0	0	0.0120482	0	0	0	0	Bacteria	Proteobacteria	Deltaproteobacteria	Oligoflexales	Oligoflexaceae	uncultured	uncultured bacterium
e794dbe4e108317c18ac761c0dfbe074	0.120482	0	0	0	0	0	0	0	0	0	Bacteria	Proteobacteria	Gammaproteobacteria	Pseudomonadales	Moraxellaceae	Psychrobacter	Unassigned
e7cf83224f04747f983b4e5f2e6f7e84	0	0	0	0	0	0	0	0	0	0.0301205	Bacteria	Proteobacteria	Alphaproteobacteria	Caulobacterales	Hyphomonadaceae	uncultured	Unassigned
e7d3cb5a4dc839485161f270d2752848	0	0	0	0	0	0.144578	0	0	0	0.060241	Bacteria	Proteobacteria	Gammaproteobacteria	SAR86 clade	uncultured bacterium	uncultured bacterium	uncultured bacterium
e81f5d09f4f22d4236cced50de7ae35b	0	0	0	0	0	0	0	0	0	0.0843373	Bacteria	Proteobacteria	Gammaproteobacteria	Betaproteobacteriales	Burkholderiaceae	Massilia	Unassigned
e85ef7cd12e2ec24d4cab614570c650b	0.0361446	0	0	0	0.0542169	0.174699	0	0	0	0	Bacteria	Bacteroidetes	Bacteroidia	Flavobacteriales	Flavobacteriaceae	NS5 marine group	Unassigned
e8a5639258aab5ade947bb5995ca7b81	0	0	0	0	0	0.0120482	0	0	0	0	Bacteria	Proteobacteria	Alphaproteobacteria	Puniceispirillales	SAR116 clade	uncultured bacterium	uncultured bacterium
e8b52a45fac143ed86d455d61a485b75	0	0	0	0	0	0	0	0	0	0.0361446	Bacteria	Bacteroidetes	Bacteroidia	Chitinophagales	uncultured	Unassigned	Unassigned
e8ba3976f4ded8b7165d66426f76dceb	0	0	0	0	0	0	0	0	0	0.0542169	Bacteria	Bacteroidetes	Bacteroidia	Flavobacteriales	Flavobacteriaceae	NS5 marine group	Unassigned
e933d1c7f59280422dd26429c29c4067	0	0	0	0	0	0	0	0.108434	0	0	Bacteria	Spirochaetes	Spirochaetia	Spirochaetales	Spirochaetaceae	Spirochaeta 2	uncultured bacterium
e971fc3b6088eeb91530f909da59c759	0	0	0	0	0	0.0301205	0	0	0	0	Bacteria	Proteobacteria	Gammaproteobacteria	Cellvibrionales	Spongiibacteraceae	Spongiibacter	Unassigned
e9b0f449c0328301a08dadca5fe4dbaa	0	0	0	0.144578	0	0	0	0.126506	0	0	Bacteria	Proteobacteria	Gammaproteobacteria	Betaproteobacteriales	Burkholderiaceae	Delftia	Unassigned
e9c7e3abd9a44f201a6d44923fb1805d	0	0	0	0	0	0	0	0	0	0.0120482	Bacteria	Proteobacteria	Gammaproteobacteria	Pseudomonadales	Moraxellaceae	Acinetobacter	Unassigned
ea508dcceebae80b2b0872c1fc543431	0	0	0	0	0	0	0	0	0	0.126506	Bacteria	Proteobacteria	Gammaproteobacteria	Betaproteobacteriales	Burkholderiaceae	Massilia	Unassigned
ead6a32a0f8fb0eef1a86e5ed69c21e6	0	0.0240964	0	0	0	0	0	0	0	0	Bacteria	Actinobacteria	Acidimicrobiia	Actinomarinales	uncultured	uncultured bacterium	uncultured bacterium
eb0a6060563fc0dade6b30f15b293558	0	0	0	0	0	0	0.060241	0	0	0	Bacteria	Proteobacteria	Gammaproteobacteria	Alteromonadales	Shewanellaceae	Shewanella	Unassigned
eb9a48407c62fdae2920970971ec5781	0	0	0	0	0	0.0542169	0	0	0	0	Bacteria	Bacteroidetes	Bacteroidia	Cytophagales	Flammeovirgaceae	Flammeovirga	Unassigned
ebeabbab3497d2dd79ceb2ed167d40a1	0.385542	0.204819	0.307229	0	0	0	0	0	0	0	Bacteria	Bacteroidetes	Bacteroidia	Flavobacteriales	Blattabacteriaceae	uncultured	uncultured bacterium
ebfeebd60373ae8adc0ae9ad0700928f	0	0	0	0	0	0.186747	0.0963855	0	0	0.192771	Bacteria	Bacteroidetes	Bacteroidia	Flavobacteriales	Flavobacteriaceae	Unassigned	Unassigned
ec351e8abc5f4654e9185b3d9877167e	0	0	0	0	0	0	0	0	0	0.0240964	Bacteria	Proteobacteria	Gammaproteobacteria	Francisellales	Francisellaceae	Unassigned	Unassigned
eca2ed7d0b6f752b0385d8958c954be1	0	0	0	0	0	0.0542169	0	0	0	0	Bacteria	Proteobacteria	Deltaproteobacteria	Bdellovibrionales	Bacteriovoracaceae	Peredibacter	Unassigned
ecf8c738d5b5ca77d2d3776b356fe700	0	0	0	0	0.150602	0	0	0	0	0	Bacteria	Proteobacteria	Gammaproteobacteria	Enterobacteriales	Enterobacteriaceae	Enterobacter	Unassigned
ed67ef3fd81d7b5c70549acba8767b1b	0	0	0	0	0	0.0120482	0	0	0	0	Bacteria	Bacteroidetes	Bacteroidia	Flavobacteriales	NS9 marine group	Unassigned	Unassigned
ed96ef04db70c8b09144cf6e0f4c8ae1	0	0	0	0	0.108434	0.457831	0	0	0	0.186747	Bacteria	Proteobacteria	Alphaproteobacteria	SAR11 clade	Clade I	Clade Ib	uncultured bacterium
eda9a7bd39d3f8f1582dfdaf533b7354	0	0	0	0	0	0	0.108434	0	0	0	Bacteria	Proteobacteria	Gammaproteobacteria	Vibrionales	Vibrionaceae	Vibrio	Unassigned
ede1db82b1d6544fdf48e24d676fddc6	0	0	0	0	0	0	0.0783133	0	0	0	Bacteria	Actinobacteria	Actinobacteria	Corynebacteriales	Unassigned	Unassigned	Unassigned
ee048eac61feae007274123b94a4daef	0.319277	0.144578	0.945783	0	0	0	0	0	0	0	Bacteria	Firmicutes	Clostridia	Clostridiales	Lachnospiraceae	Vallitalea	uncultured bacterium
ee5764ff4152ad29117f0814dd4b9374	0	0	0	0	0	0	0	0.0662651	0	0	Bacteria	Proteobacteria	Alphaproteobacteria	Rhodobacterales	Rhodobacteraceae	Unassigned	Unassigned
ee5af0736bcacf332d904764a320b3ac	0	0	0	0	0	0	0	0.126506	0	0	Bacteria	Proteobacteria	Gammaproteobacteria	Pseudomonadales	Moraxellaceae	Acinetobacter	Unassigned
eea4428850fcc2fb2affb151de0dd1d9	1	0	0	0	0	0	0	0	0	0	Bacteria	Firmicutes	Bacilli	Lactobacillales	Enterococcaceae	Enterococcus	Unassigned
eeb63e7602e2eba31a85235e1b7f6a1f	0	0	0	0	0	0.0120482	0	0	0	0	Bacteria	Bacteroidetes	Bacteroidia	Flavobacteriales	Flavobacteriaceae	NS5 marine group	Unassigned
eebb6af51961f518165ab4af3cf33e85	2.04819	0.457831	0.192771	1.99398	3.37349	14.5	2.41566	2.19277	0.445783	10.6566	Bacteria	Proteobacteria	Alphaproteobacteria	Rhodobacterales	Rhodobacteraceae	HIMB11	Unassigned
ef01d86c414fd19ea0e666e49e78f988	0	0	0	0	0	0	0	0	0	0.0060241	Bacteria	Proteobacteria	Deltaproteobacteria	Oligoflexales	Oligoflexaceae	Pseudobacteriovorax	Unassigned
efcca40bb69c16d2ad111e5194bbeb61	0	0	0	0	0	0.0180723	0	0	0	0	Bacteria	Proteobacteria	Alphaproteobacteria	Puniceispirillales	SAR116 clade	Unassigned	Unassigned
efe44c2605a91098ee4a7019eb2874cd	0	0	0	0	0.0421687	0	0	0	0	0	Bacteria	Actinobacteria	Rubrobacteria	Rubrobacterales	Rubrobacteriaceae	Rubrobacter	uncultured bacterium
f02daae6a8e3f6ad4c619c7294fdc6cb	0	0	0	0	0	0.0542169	0	0	0	0	Bacteria	Planctomycetes	Phycisphaerae	Phycisphaerales	Phycisphaeraceae	Urania-1B-19 marine sediment group	uncultured bacterium
f0413572681349400c96a3b09c93b7ca	0	0	0	0	0	0	0	0	0	0.0301205	Bacteria	Proteobacteria	Gammaproteobacteria	Unassigned	Unassigned	Unassigned	Unassigned
f05ae580f2dadbd8855562bc3bbe4feb	0	0	0	0	0	0.198795	0	0.0060241	0	0.186747	Archaea	Euryarchaeota	Thermoplasmata	Marine Group II	Unassigned	Unassigned	Unassigned
f16fcb31a1785d125b70a073c407bf64	0	0.0180723	0	0.0843373	0.5	0	0.0662651	0.150602	0.114458	0	Bacteria	Proteobacteria	Alphaproteobacteria	Rhodobacterales	Rhodobacteraceae	Paracoccus	uncultured bacterium
f1c912829b87ad7c4ee29877fe9e81f3	0	0	0.0421687	0	0	0	0	0	0	0	Bacteria	Epsilonbacteraeota	Campylobacteria	Campylobacterales	Sulfurovaceae	Sulfurovum	uncultured bacterium
f1e94f474babcb7c271d5ffcabb09ea5	0	0	0	0	0	0	0.0481928	0	0	0	Bacteria	Bacteroidetes	Bacteroidia	Flavobacteriales	NS9 marine group	uncultured bacterium	uncultured bacterium
f215894341e86f02373eb9ff69f7820a	0	0	0	0	0	0.0120482	0	0	0	0	Bacteria	Proteobacteria	Gammaproteobacteria	Cellvibrionales	Halieaceae	OM60(NOR5) clade	uncultured bacterium
f21ebf088dc5d9eadfd2899641334c30	0	0	0	0	0	0	0.421687	0	0	0	Bacteria	Proteobacteria	Gammaproteobacteria	Vibrionales	Vibrionaceae	Vibrio	Unassigned
f23394e6125798721ebf3ea7564af3cf	0	0.0481928	0	0	0	0	0	0	0	0	Bacteria	Lentisphaerae	Oligosphaeria	P.palmC41	Unassigned	Unassigned	Unassigned
f2601f2f9f4ba86823bb712068aeb0c5	0	0	0	0	0	0.198795	0.0722892	0.36747	0	0.53012	Bacteria	Bacteroidetes	Bacteroidia	Flavobacteriales	NS7 marine group	uncultured bacterium	uncultured bacterium
f265d17a7f8bdfe6a8744c66d3701b35	0.0421687	0	0	0	0	0	0	0	0	0	Bacteria	Proteobacteria	Deltaproteobacteria	PB19	Unassigned	Unassigned	Unassigned
f2cd16c11c545eacd04188273c5f0cc3	0	0	0	0	0	0	0	0	0	0.060241	Bacteria	Epsilonbacteraeota	Campylobacteria	Campylobacterales	Arcobacteraceae	Arcobacter	uncultured bacterium
f2e90a3a1e86b69f6430644e7fafd395	0	0	0	0	0	0.0120482	0	0	0	0	Bacteria	Proteobacteria	Deltaproteobacteria	Desulfobacterales	Desulfobacteraceae	Desulfocella	Unassigned
f2fda1352a4664c7f47d353d1a02e3da	0	0	0	0	0	0.0240964	0	0	0	0	Bacteria	Proteobacteria	Alphaproteobacteria	SAR11 clade	Clade I	Clade Ia	Unassigned
f309c442370db20f80ef92f644aa0b85	0	0	0	0	0	0.0662651	0	0	0	0	Bacteria	Proteobacteria	Gammaproteobacteria	Oceanospirillales	Litoricolaceae	Litoricola	uncultured bacterium
f3397f57189506303b5f8eda7de128fd	0	0	0	0.126506	0.10241	0.13253	0	0	0	0.0421687	Bacteria	Proteobacteria	Gammaproteobacteria	Thiomicrospirales	Thioglobaceae	SUP05 cluster	uncultured bacterium
f3b271e9c3d66e0c15ba059b4b2ee2ea	0	0	0	0.108434	0	0	0	0	0	0	Bacteria	Proteobacteria	Alphaproteobacteria	Unassigned	Unassigned	Unassigned	Unassigned
f3e14311faed1d945f407b7833cd322a	0	0	0	0	0	0.0120482	0	0	0	0	Bacteria	Proteobacteria	Alphaproteobacteria	Puniceispirillales	SAR116 clade	Unassigned	Unassigned
f43ad2813fa33701a1f5a234af5e39d4	0	0	0	0	0	0	0	0.0662651	0	0	Bacteria	Actinobacteria	Actinobacteria	Micrococcales	Brevibacteriaceae	Brevibacterium	Unassigned
f451dfb4f855ca7f1064bebcddb05729	0	0	0	0	0	0.114458	0	0	0	0	Bacteria	Verrucomicrobia	Verrucomicrobiae	Verrucomicrobiales	Rubritaleaceae	Rubritalea	Unassigned
f458488bd2d4b2c6f04e4f05289c8ff0	0	0	0.0301205	0	0	0	0	0	0	0	Bacteria	Proteobacteria	Alphaproteobacteria	Rhodospirillales	AEGEAN-169 marine group	Unassigned	Unassigned
f49327cba067dc57b0e432325d1c931f	0	0	0	0.144578	0.10241	1.21084	0.771084	0.120482	0.626506	3.95783	Bacteria	Bacteroidetes	Bacteroidia	Flavobacteriales	Flavobacteriaceae	NS5 marine group	uncultured Flavobacteriaceae bacterium
f56cca8b597c163c85905ca0f652eb22	0	0	0	0	0	0.0301205	0	0	0	0	Bacteria	Proteobacteria	Deltaproteobacteria	Bdellovibrionales	Bacteriovoracaceae	Peredibacter	uncultured bacterium
f57b310a474da63fbde427c434b918b7	0	0	0	0	0.222892	0	0	0.26506	0.156627	0	Bacteria	Proteobacteria	Gammaproteobacteria	Oceanospirillales	Endozoicomonadaceae	Endozoicomonas	uncultured bacterium
f5e217f6272bf273260bfb72df1efbfa	0	0	0	0.0722892	0	0	0	0	0	0	Bacteria	Proteobacteria	Gammaproteobacteria	Coxiellales	Coxiellaceae	Coxiella	Unassigned
f65d20f260aeef3634e4a7afda5df4a5	0	0	0	0	0.0120482	0	0	0	0	0	Bacteria	Acidobacteria	Unassigned	Unassigned	Unassigned	Unassigned	Unassigned
f778c209307508947d9e1eeaf23e6588	0	0	0	0	0	0	0.0542169	0	0	0	Bacteria	Proteobacteria	Deltaproteobacteria	Desulfobacterales	Desulfobacteraceae	Desulfotignum	Unassigned
f78ecd3bf27b1498e61567a1c04fec40	0	0	0	0.0662651	0	0	0	0	0	0	Bacteria	Proteobacteria	Gammaproteobacteria	Alteromonadales	Shewanellaceae	Shewanella	Unassigned
f79527c7476876b7e62e33d84aa73cb9	0	0.0361446	0	0	0	0.813253	0	0.126506	0	0.361446	Archaea	Euryarchaeota	Thermoplasmata	Marine Group II	Unassigned	Unassigned	Unassigned
f7da26164a2a779d5bde746facbc2da5	0	0	0	0	0	0	0	0	0	0.060241	Bacteria	Proteobacteria	Deltaproteobacteria	Bdellovibrionales	Bdellovibrionaceae	OM27 clade	Unassigned
f7e35d1ca76b695d2d20182c88f36aa0	0	0	0	0	0	0.0120482	0	0	0	0	Bacteria	Proteobacteria	Gammaproteobacteria	Unassigned	Unassigned	Unassigned	Unassigned
f828f6a3bb3ae8c4a7782dcbea93478b	1.80723	0.590361	0.39759	3.40964	1.95181	12.5723	3.13253	3.43373	1.3012	9.07229	Bacteria	Proteobacteria	Alphaproteobacteria	SAR11 clade	Clade I	Clade Ia	Unassigned
f85a5d770c1fb7991a66e2bf5297e684	0	0	0	0	0	0	0	0.0963855	0	0	Bacteria	Firmicutes	Bacilli	Lactobacillales	Streptococcaceae	Lactococcus	Unassigned
f861fb5645d4ae08231b80179ad2b2e2	0	0	0	0	0.060241	0	0	0	0	0	Bacteria	Proteobacteria	Gammaproteobacteria	Pseudomonadales	Pseudomonadaceae	Pseudomonas	Unassigned
f89a3eb34337e6eca4ef8eaa7a1e21f1	0	0	0	0	0	0	0.0301205	0	0	0	Bacteria	Proteobacteria	Gammaproteobacteria	Steroidobacterales	Woeseiaceae	Woeseia	Unassigned
f8a275ad0fe187a4a0eba14f44530412	0	0	0	0	0	0	0	0	0	0.0120482	Bacteria	Proteobacteria	Alphaproteobacteria	Rhodobacterales	Rhodobacteraceae	HIMB11	Unassigned
f936dc866bac4ac495c010cd4d23d20c	0	0	0	0	0	0.0120482	0	0	0	0	Bacteria	Proteobacteria	Gammaproteobacteria	SAR86 clade	uncultured bacterium	uncultured bacterium	uncultured bacterium
f9568afa9233a42c37d6559c96e79b1c	0	0	0	0.210843	0	0	0	0	0	0	Bacteria	Epsilonbacteraeota	Campylobacteria	Campylobacterales	Arcobacteraceae	Arcobacter	uncultured bacterium
f97121eb65cc5dba931b86c607c816e9	0	0	0	0.120482	0.10241	0	0	0	0.0361446	0	Bacteria	Actinobacteria	Actinobacteria	Corynebacteriales	Corynebacteriaceae	Corynebacterium 1	Unassigned
f97af527fa7f513766932f0d69a31f67	0	0	0	0	0	0.0180723	0	0	0	0	Bacteria	Proteobacteria	Gammaproteobacteria	SAR86 clade	Unassigned	Unassigned	Unassigned
f9e289f67f361ce5bcb72f5ec568ebae	0.0240964	0	0	0	0	0	0	0	0	0	Bacteria	Proteobacteria	Gammaproteobacteria	Aeromonadales	Aeromonadaceae	Unassigned	Unassigned
fa6ddf701856c268376e6b5f33e631e7	0	0	0	0	0	0	0	0	0	0.0240964	Bacteria	Proteobacteria	Gammaproteobacteria	SAR86 clade	Unassigned	Unassigned	Unassigned
fa82a14ddac288d5ab8772842485d3f6	0.210843	0	0	0	0.114458	0	0	0	0	0	Bacteria	Bacteroidetes	Bacteroidia	Cytophagales	Cyclobacteriaceae	Unassigned	Unassigned
fa82ad0487de8893edc5b9e45f209677	0	0	0	0	0	0	0.0481928	0	0	0	Bacteria	Proteobacteria	Gammaproteobacteria	Steroidobacterales	Woeseiaceae	Woeseia	Unassigned
fb4f6ea5e561c364aaa3a9f6c88e188f	0	0	0	0	0.0722892	0	0	0	0.060241	0	Bacteria	Actinobacteria	Actinobacteria	Corynebacteriales	Corynebacteriaceae	Corynebacterium 1	uncultured bacterium
fbc3017101c0dc7a355b3efb49ca6eba	0	0	0	0	0	0.271084	0	0	0	0.0783133	Bacteria	Proteobacteria	Gammaproteobacteria	Oceanospirillales	Alcanivoracaceae	Alcanivorax	Unassigned
fbfe6db7af64ec676828c4e74938f2f5	0	0	0	0	0	0	0.0301205	0	0	0.487952	Bacteria	Proteobacteria	Gammaproteobacteria	Pseudomonadales	Moraxellaceae	Acinetobacter	Unassigned
fc02c407947a20722e44dfce0ce6c146	0	0	0	0	0.26506	0	0	0	0	0	Bacteria	Firmicutes	Bacilli	Bacillales	Staphylococcaceae	Staphylococcus	uncultured bacterium
fc2ac0f250b5fa962fc1debfb3d6d661	0	0.13253	0	0	0	0	0	0	0	0	Bacteria	Proteobacteria	Alphaproteobacteria	Rhodospirillales	Rhodospirillaceae	Candidatus Riegeria	Unassigned
fc4d5f5d27daa3b6779c39a253d3a669	0	0	0	0	0	0.0240964	0	0	0	0	Bacteria	Proteobacteria	Gammaproteobacteria	Oceanospirillales	Alcanivoracaceae	Alcanivorax	Unassigned
fe35b25084823b8e397f0f93a04baf89	0	0	0	0	0	0.0421687	0	0	0	0	Bacteria	Bacteroidetes	Bacteroidia	Flavobacteriales	NS9 marine group	uncultured bacterium	uncultured bacterium
fe6f57085527d491704730ecd73a20fa	0	0.0662651	0	0	0	0	0	0	0	0	Bacteria	Bacteroidetes	Bacteroidia	Bacteroidales	Prolixibacteraceae	Roseimarinus	uncultured Bacteroidetes bacterium
fe7888beb49ffd54f8e509ab24ee977a	0	0	0	0	0	0	0.0301205	0	0	0	Bacteria	Proteobacteria	Gammaproteobacteria	Cellvibrionales	Halieaceae	Unassigned	Unassigned
fe9511cc92d95adefd77dd1f86225ec9	0	0	0	0	0.0301205	0.114458	0	0	0	0	Bacteria	Proteobacteria	Gammaproteobacteria	SAR86 clade	Unassigned	Unassigned	Unassigned
feb1881b89bdc99501a62d559e84f06b	0	0	0	0	0	0	0	0	0.0843373	0	Bacteria	Proteobacteria	Gammaproteobacteria	Cellvibrionales	Unassigned	Unassigned	Unassigned
feef2d689d45dc32a53a349fc407a5fb	0	0	0	0	0	0.0843373	0	0	0	0	Bacteria	Bacteroidetes	Bacteroidia	Flavobacteriales	NS9 marine group	uncultured bacterium	uncultured bacterium
feefc5a3f5d670e24555d3f3d2b0088e	0	0	0.0421687	0	0	0	0	0	0	0	Bacteria	Proteobacteria	Gammaproteobacteria	Oceanospirillales	Saccharospirillaceae	Oleibacter	uncultured bacterium
ff28bdf705c7a06ff4adb295cb5e90b6	0	0	0	0	0	0	0.0963855	0	0	0	Bacteria	Proteobacteria	Gammaproteobacteria	Oceanospirillales	Endozoicomonadaceae	Endozoicomonas	uncultured bacterium
ff4c88793e9325e407ad352eada4d594	0.481928	0.13253	0	0.180723	0.343373	1.26506	0.698795	1.27711	0.138554	2.25301	Bacteria	Bacteroidetes	Bacteroidia	Flavobacteriales	Flavobacteriaceae	NS5 marine group	Unassigned
ff59d5dc4c36e2b70fdc3911cfab779c	0	0	0	0	0	0.0903614	0	0	0	0	Bacteria	Proteobacteria	Deltaproteobacteria	SAR324 clade(Marine group B)	uncultured bacterium	uncultured bacterium	uncultured bacterium
ff9d54e967b7699e926cdfd7dea8f81d	0	0	0.0361446	0	0	0	0	0	0	0	Bacteria	Firmicutes	Clostridia	Clostridiales	Caldicoprobacteraceae	Caldicoprobacter	Unassigned
